# Supplementary material for: Transcriptional profiling of sugarcane leaves and roots under progressive osmotic stress reveals a regulated coordination of gene expression in a spatiotemporal manner
Source: PubMed Central journal article supplement (PMC5724895; doi:10.1371/journal.pone.0189271), 2017-12-11
Supplement: pone.0189271.s002.pdf [file pone.0189271.s002.pdf]

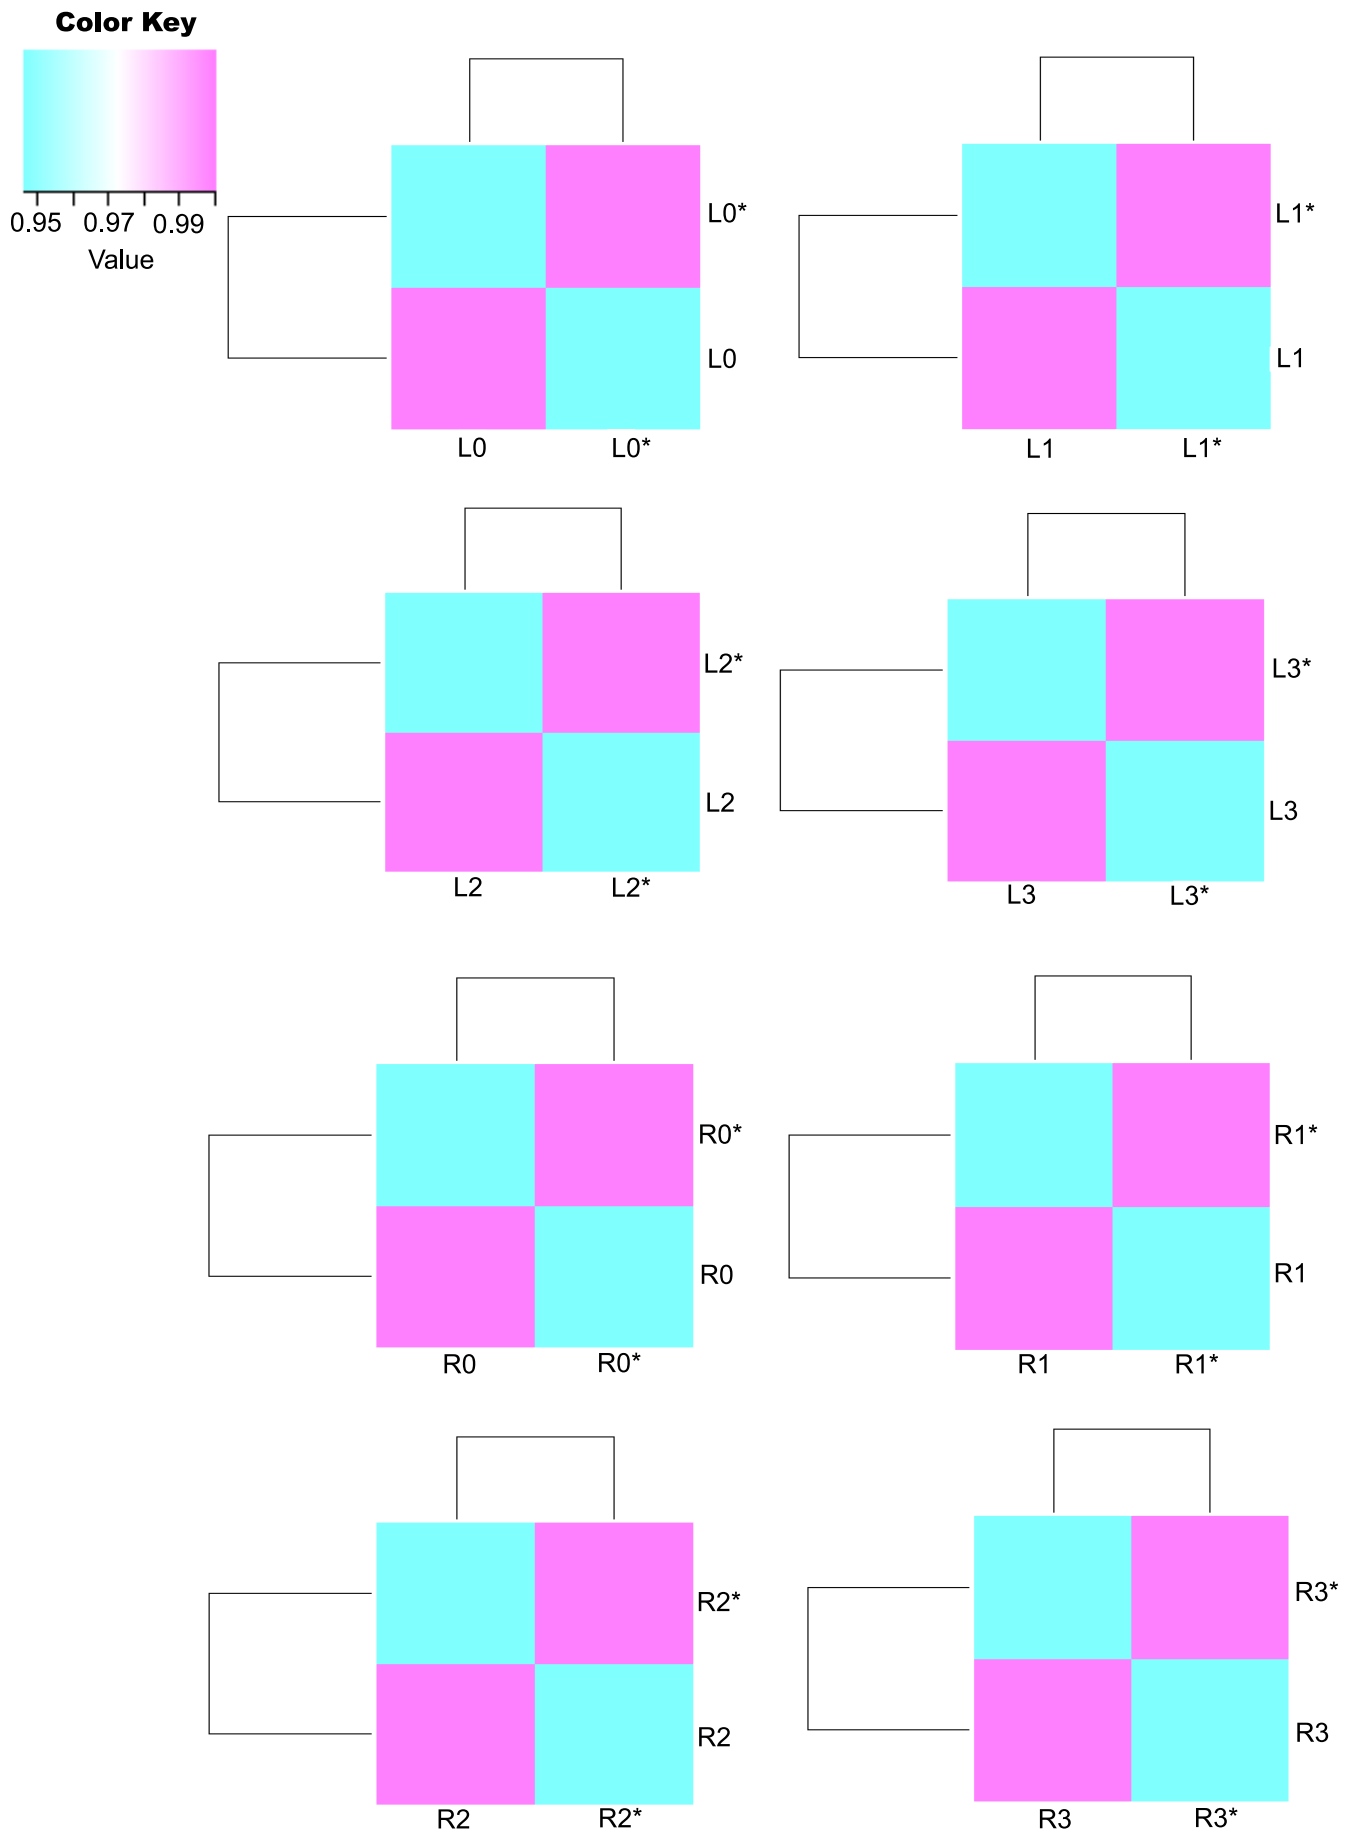

**Figure S1.** Pearson's correlation analysis among replicates of each biological sample. L=leaf, R=root, L0 and R0= non-stress treatment, L1 and R1=24 h treatment ASI, L2 and R2=48 h treatment ASI, L3 and R3=72 h treatment ASI. \*=biological replicate.
