# Supplementary material for: Transcriptional profiling of sugarcane leaves and roots under progressive osmotic stress reveals a regulated coordination of gene expression in a spatiotemporal manner
Source: PubMed Central journal article supplement (PMC5724895; doi:10.1371/journal.pone.0189271), 2017-12-11
Supplement: pone.0189271.s003.pdf [file pone.0189271.s003.pdf]

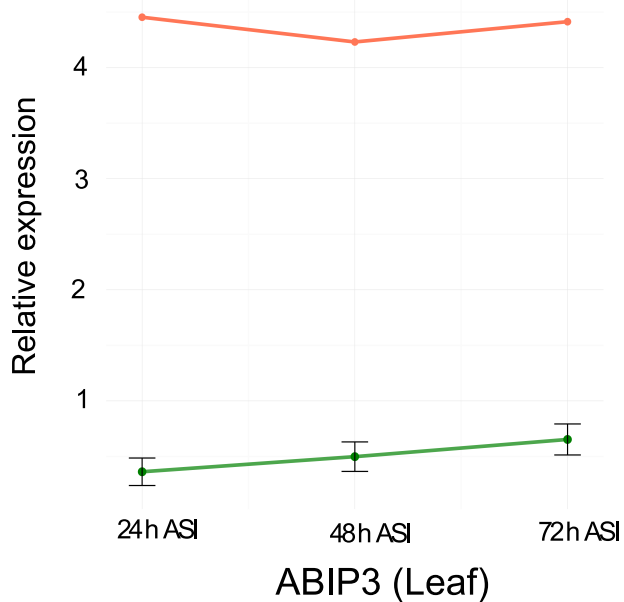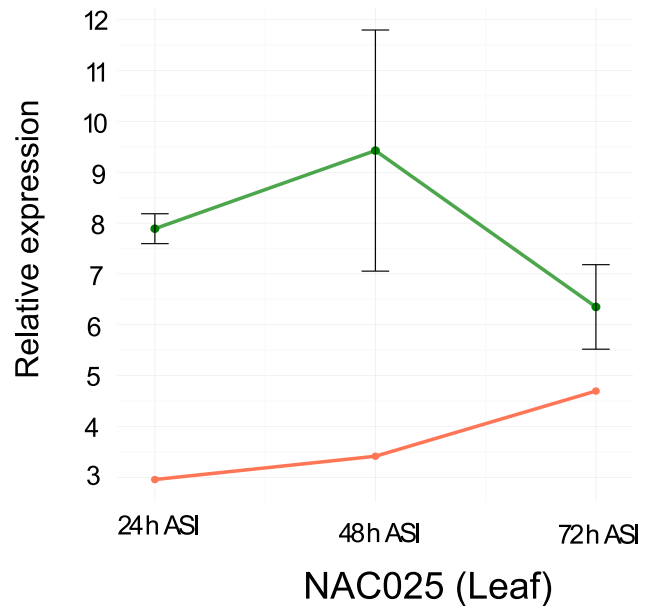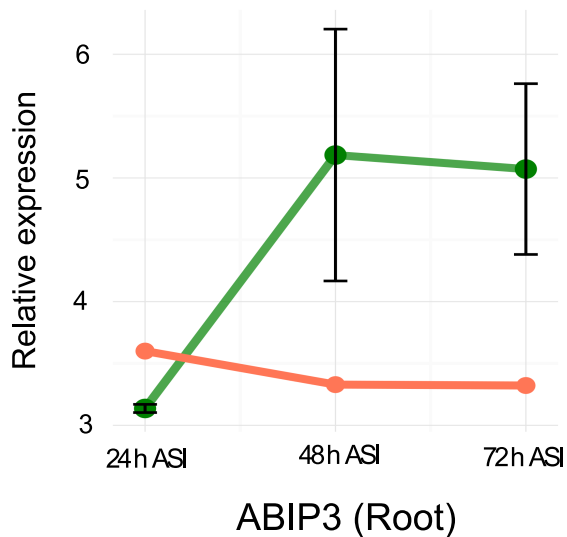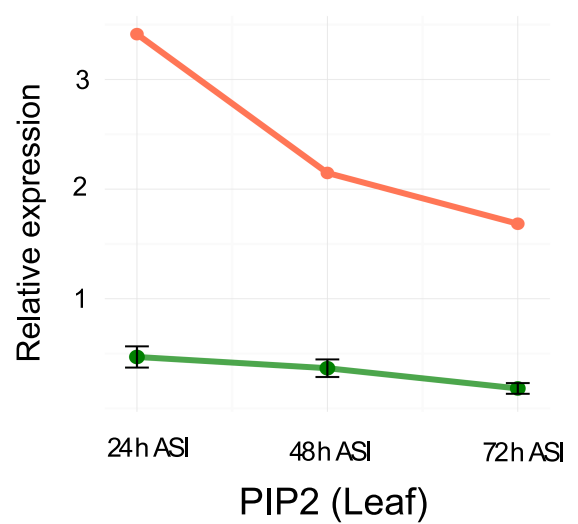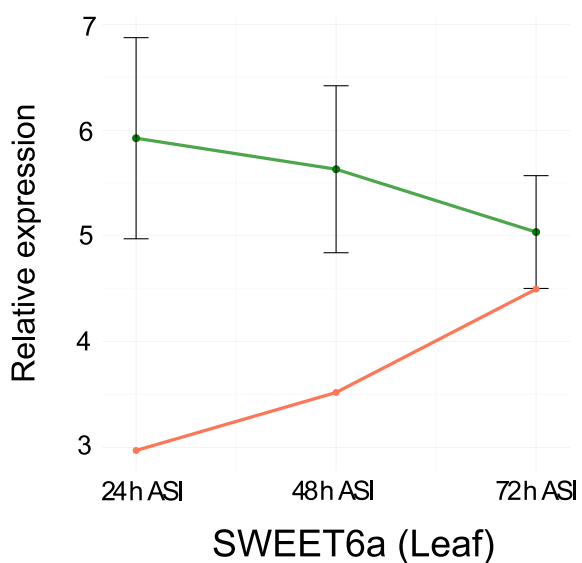

—●— RNA-Seq (Log2FC)  
 —●— qRT-PCR ( $2^{\Delta\Delta CT}$ )

**Figure S2.** qRT-PCR analysis of five significantly regulated genes randomly selected into the osmotic stress treatments. The x-axis represent the three times of stress treatments, y-axis represent the relative gene expression levels. Error bars were obtained from three technical replicates.
