# Supplementary material for: Transcriptional profiling of sugarcane leaves and roots under progressive osmotic stress reveals a regulated coordination of gene expression in a spatiotemporal manner
Source: PLoS One. 2017 Dec 11;12(12):e0189271. doi: 10.1371/journal.pone.0189271 (PMC5724895; doi:10.1371/journal.pone.0189271)
Supplement: S2 File — (XLSX) [file pone.0189271.s005.xlsx]

## Sheet: Hoja1
S2 File. Unigenes with homology match detected in the Kyoto Encyclopedia of Genes and Genomes (KEGG) biochemical pathways.
Pathway	Seqs in Pathway	Enzyme	Ezyme ID	Seqs of Enzyme	Seqs	Pathway ID
alpha-Linolenic acid metabolism	13	A2	ec:3.1.1.4	3	TRINITY_DN44941_c1_g1_i1, TRINITY_DN45446_c0_g1_i1, TRINITY_DN59876_c1_g1_i1	map00592
alpha-Linolenic acid metabolism	13	A1	ec:3.1.1.32	1	TRINITY_DN57970_c0_g2_i1	map00592
alpha-Linolenic acid metabolism	13	dehydrogenase	ec:1.1.1.1	1	TRINITY_DN47826_c0_g1_i1	map00592
alpha-Linolenic acid metabolism	13	hydratase	ec:4.2.1.17	1	TRINITY_DN50255_c0_g1_i1	map00592
alpha-Linolenic acid metabolism	13	oxidase	ec:1.3.3.6	7	TRINITY_DN47587_c3_g1_i1, TRINITY_DN64695_c1_g4_i1, TRINITY_DN51542_c14_g1_i1, TRINITY_DN47587_c4_g1_i1, TRINITY_DN47587_c2_g1_i1, TRINITY_DN47587_c0_g2_i1, TRINITY_DN47587_c0_g1_i1	map00592
Biosynthesis of unsaturated fatty acids	10	hydratase	ec:4.2.1.17	1	TRINITY_DN50255_c0_g1_i1	map01040
Biosynthesis of unsaturated fatty acids	10	9-desaturase	ec:1.14.19.2	2	TRINITY_DN49680_c1_g1_i1, TRINITY_DN51113_c0_g1_i1	map01040
Biosynthesis of unsaturated fatty acids	10	oxidase	ec:1.3.3.6	7	TRINITY_DN47587_c3_g1_i1, TRINITY_DN64695_c1_g4_i1, TRINITY_DN51542_c14_g1_i1, TRINITY_DN47587_c4_g1_i1, TRINITY_DN47587_c2_g1_i1, TRINITY_DN47587_c0_g2_i1, TRINITY_DN47587_c0_g1_i1	map01040
Linoleic acid metabolism	3	A2	ec:3.1.1.4	3	TRINITY_DN44941_c1_g1_i1, TRINITY_DN45446_c0_g1_i1, TRINITY_DN59876_c1_g1_i1	map00591
Arachidonic acid metabolism	13	peroxidase	ec:1.11.1.9	9	TRINITY_DN62674_c5_g2_i1, TRINITY_DN48171_c2_g1_i1, TRINITY_DN44915_c0_g2_i1, TRINITY_DN51100_c4_g1_i1, TRINITY_DN44915_c0_g1_i1, TRINITY_DN59513_c1_g1_i1, TRINITY_DN46442_c0_g1_i1, TRINITY_DN41396_c0_g1_i1, TRINITY_DN48171_c3_g1_i1	map00590
Arachidonic acid metabolism	13	A2	ec:3.1.1.4	3	TRINITY_DN44941_c1_g1_i1, TRINITY_DN45446_c0_g1_i1, TRINITY_DN59876_c1_g1_i1	map00590
Arachidonic acid metabolism	13	1-monooxygenase	ec:1.14.15.3	1	TRINITY_DN48590_c6_g1_i1	map00590
Taurine and hypotaurine metabolism	9	decarboxylase	ec:4.1.1.15	6	TRINITY_DN46881_c1_g1_i1, TRINITY_DN53632_c0_g1_i1, TRINITY_DN53632_c0_g2_i1, TRINITY_DN46881_c0_g1_i1, TRINITY_DN53632_c1_g1_i1, TRINITY_DN53632_c1_g2_i1	map00430
Taurine and hypotaurine metabolism	9	glutamyl transpeptidase	ec:2.3.2.2	2	TRINITY_DN59740_c0_g1_i1, TRINITY_DN58310_c1_g1_i1	map00430
Taurine and hypotaurine metabolism	9	dehydrogenase	ec:1.4.1.2	1	TRINITY_DN57263_c4_g1_i1	map00430
Sulfur metabolism	26	sulfurtransferase	ec:2.8.1.1	2	TRINITY_DN44712_c2_g1_i1, TRINITY_DN53839_c4_g1_i1	map00920
Sulfur metabolism	26	sulfite reductase (ferredoxin)	ec:1.8.7.1	1	TRINITY_DN50915_c1_g1_i1	map00920
Sulfur metabolism	26	adenosine 5-phosphosulfate sulfohydrolase	ec:3.6.2.1	2	TRINITY_DN49177_c2_g1_i1, TRINITY_DN58152_c0_g1_i1	map00920
Sulfur metabolism	26	reductase (thioredoxin)	ec:1.8.4.8	1	TRINITY_DN52503_c0_g1_i1	map00920
Sulfur metabolism	26	adenylyltransferase	ec:2.7.7.4	3	TRINITY_DN58337_c3_g1_i1, TRINITY_DN58337_c3_g2_i1, TRINITY_DN37475_c0_g3_i1	map00920
Sulfur metabolism	26	adenylyltransferase (ADP)	ec:2.7.7.5	1	TRINITY_DN58152_c0_g1_i1	map00920
Sulfur metabolism	26	oxidase	ec:1.8.3.1	1	TRINITY_DN54159_c6_g1_i1	map00920
Sulfur metabolism	26	O-acetyltransferase	ec:2.3.1.30	4	TRINITY_DN50292_c1_g1_i1, TRINITY_DN40150_c0_g1_i1, TRINITY_DN51529_c8_g1_i1, TRINITY_DN50292_c1_g3_i1	map00920
Sulfur metabolism	26	dioxygenase	ec:1.13.11.18	1	TRINITY_DN49352_c3_g1_i1	map00920
Sulfur metabolism	26	synthase	ec:2.5.1.47	11	TRINITY_DN52394_c8_g1_i1, TRINITY_DN67124_c0_g1_i1, TRINITY_DN48120_c1_g1_i1, TRINITY_DN52394_c3_g1_i1, TRINITY_DN59181_c3_g1_i1, TRINITY_DN52394_c5_g1_i1, TRINITY_DN55897_c0_g1_i1, TRINITY_DN52394_c6_g1_i1, TRINITY_DN68631_c0_g1_i1, TRINITY_DN52394_c6_g2_i1, TRINITY_DN48120_c4_g1_i1	map00920
Steroid degradation	9	dehydrogenase	ec:1.1.1.145	7	TRINITY_DN45334_c5_g2_i1, TRINITY_DN65521_c1_g2_i1, TRINITY_DN56129_c2_g1_i1, TRINITY_DN51421_c3_g1_i1, TRINITY_DN42587_c0_g1_i1, TRINITY_DN65521_c1_g1_i1, TRINITY_DN45334_c4_g1_i1	map00984
Steroid degradation	9	4-dehydrogenase (acceptor)	ec:1.3.99.5	2	TRINITY_DN52781_c0_g1_i1, TRINITY_DN50533_c0_g1_i1	map00984
Drug metabolism - other enzymes	135	hydantoinase	ec:3.5.2.2	1	TRINITY_DN60538_c10_g1_i1	map00983
Drug metabolism - other enzymes	135	kinase	ec:2.7.1.48	8	TRINITY_DN47892_c1_g1_i1, TRINITY_DN53275_c1_g1_i1, TRINITY_DN64010_c5_g1_i1, TRINITY_DN55737_c2_g1_i1, TRINITY_DN59359_c3_g1_i1, TRINITY_DN57666_c4_g2_i1, TRINITY_DN63954_c4_g1_i1, TRINITY_DN55293_c1_g1_i1	map00983
Drug metabolism - other enzymes	135	deaminase	ec:3.5.4.5	1	TRINITY_DN47078_c0_g1_i1	map00983
Drug metabolism - other enzymes	135	kinase	ec:2.7.1.21	1	TRINITY_DN54218_c1_g1_i1	map00983
Drug metabolism - other enzymes	135	diphosphatase	ec:3.6.1.19	2	TRINITY_DN56256_c0_g1_i1, TRINITY_DN62244_c6_g1_i1	map00983
Drug metabolism - other enzymes	135	oxidase	ec:1.17.3.2	1	TRINITY_DN52936_c3_g1_i1	map00983
Drug metabolism - other enzymes	135	ali-esterase	ec:3.1.1.1	94	TRINITY_DN43261_c1_g1_i1, TRINITY_DN57970_c0_g2_i1, TRINITY_DN53124_c1_g2_i1, TRINITY_DN44941_c1_g1_i1, TRINITY_DN45868_c0_g1_i1, TRINITY_DN57250_c1_g1_i1, TRINITY_DN61818_c2_g1_i1, TRINITY_DN55901_c2_g2_i1, TRINITY_DN46393_c0_g1_i1, TRINITY_DN53007_c3_g1_i1, TRINITY_DN62027_c2_g2_i1, TRINITY_DN46637_c2_g1_i1, TRINITY_DN60809_c2_g1_i1, TRINITY_DN57081_c2_g1_i1, TRINITY_DN43610_c1_g1_i1, TRINITY_D…	map00983
Drug metabolism - other enzymes	135	dehydrogenase	ec:1.1.1.205	2	TRINITY_DN59040_c1_g1_i1, TRINITY_DN46711_c0_g1_i1	map00983
Drug metabolism - other enzymes	135	dehydrogenase (NADP+)	ec:1.3.1.2	2	TRINITY_DN51540_c2_g2_i1, TRINITY_DN51540_c2_g1_i1	map00983
Drug metabolism - other enzymes	135	phosphoribosyltransferase	ec:2.4.2.10	5	TRINITY_DN61891_c6_g1_i1, TRINITY_DN40757_c0_g1_i1, TRINITY_DN61891_c7_g1_i1, TRINITY_DN61891_c5_g1_i1, TRINITY_DN56993_c4_g1_i1	map00983
Drug metabolism - other enzymes	135	1-naphthol glucuronyltransferase	ec:2.4.1.17	17	TRINITY_DN54766_c3_g3_i1, TRINITY_DN55415_c1_g1_i1, TRINITY_DN51499_c1_g1_i1, TRINITY_DN50200_c2_g1_i1, TRINITY_DN61696_c1_g2_i1, TRINITY_DN52822_c6_g1_i1, TRINITY_DN49341_c0_g2_i1, TRINITY_DN58223_c3_g1_i1, TRINITY_DN54252_c2_g2_i1, TRINITY_DN61696_c1_g8_i1, TRINITY_DN40695_c0_g2_i1, TRINITY_DN62211_c2_g1_i1, TRINITY_DN52822_c1_g1_i1, TRINITY_DN62544_c0_g1_i1, TRINITY_DN52378_c0_g1_i1, TRINITY_D…	map00983
Drug metabolism - other enzymes	135	phosphoribosyltransferase	ec:2.4.2.8	1	TRINITY_DN53896_c4_g1_i1	map00983
Drug metabolism - cytochrome P450	259	transferase	ec:2.5.1.18	197	TRINITY_DN53584_c1_g1_i1, TRINITY_DN46500_c1_g1_i1, TRINITY_DN58380_c3_g1_i1, TRINITY_DN49304_c1_g1_i1, TRINITY_DN48967_c2_g1_i1, TRINITY_DN62743_c2_g3_i1, TRINITY_DN65544_c6_g1_i1, TRINITY_DN47322_c0_g2_i1, TRINITY_DN65544_c10_g1_i1, TRINITY_DN54500_c2_g1_i1, TRINITY_DN65573_c4_g1_i1, TRINITY_DN65486_c2_g1_i1, TRINITY_DN47297_c2_g1_i1, TRINITY_DN61230_c1_g1_i1, TRINITY_DN50443_c1_g1_i1, TRINITY_…	map00982
Drug metabolism - cytochrome P450	259	dehydrogenase	ec:1.1.1.1	1	TRINITY_DN47826_c0_g1_i1	map00982
Drug metabolism - cytochrome P450	259	monooxygenase	ec:1.14.13.8	31	TRINITY_DN60604_c0_g1_i1, TRINITY_DN49630_c1_g1_i1, TRINITY_DN60604_c0_g3_i1, TRINITY_DN43898_c2_g2_i1, TRINITY_DN51557_c2_g1_i1, TRINITY_DN52194_c2_g1_i1, TRINITY_DN64936_c2_g1_i1, TRINITY_DN59038_c3_g1_i1, TRINITY_DN59193_c0_g1_i1, TRINITY_DN4283_c0_g1_i1, TRINITY_DN52111_c1_g1_i1, TRINITY_DN41973_c1_g1_i1, TRINITY_DN64936_c0_g1_i1, TRINITY_DN70279_c0_g1_i1, TRINITY_DN7547_c0_g1_i1, TRINITY_DN5…	map00982
Drug metabolism - cytochrome P450	259	dehydrogenase [NAD(P)+]	ec:1.2.1.5	2	TRINITY_DN57151_c1_g1_i1, TRINITY_DN52174_c4_g1_i1	map00982
Drug metabolism - cytochrome P450	259	oxidase	ec:1.2.3.1	11	TRINITY_DN44040_c2_g1_i1, TRINITY_DN65607_c2_g4_i1, TRINITY_DN43565_c1_g1_i1, TRINITY_DN9832_c0_g1_i1, TRINITY_DN44040_c1_g1_i1, TRINITY_DN7612_c0_g1_i1, TRINITY_DN44040_c0_g2_i1, TRINITY_DN65607_c2_g1_i1, TRINITY_DN65607_c2_g2_i1, TRINITY_DN65607_c2_g3_i1, TRINITY_DN44040_c0_g1_i1	map00982
Drug metabolism - cytochrome P450	259	1-naphthol glucuronyltransferase	ec:2.4.1.17	17	TRINITY_DN54766_c3_g3_i1, TRINITY_DN55415_c1_g1_i1, TRINITY_DN51499_c1_g1_i1, TRINITY_DN50200_c2_g1_i1, TRINITY_DN61696_c1_g2_i1, TRINITY_DN52822_c6_g1_i1, TRINITY_DN49341_c0_g2_i1, TRINITY_DN58223_c3_g1_i1, TRINITY_DN54252_c2_g2_i1, TRINITY_DN61696_c1_g8_i1, TRINITY_DN40695_c0_g2_i1, TRINITY_DN62211_c2_g1_i1, TRINITY_DN52822_c1_g1_i1, TRINITY_DN62544_c0_g1_i1, TRINITY_DN52378_c0_g1_i1, TRINITY_D…	map00982
Metabolism of xenobiotics by cytochrome P450	217	transferase	ec:2.5.1.18	197	TRINITY_DN53584_c1_g1_i1, TRINITY_DN46500_c1_g1_i1, TRINITY_DN58380_c3_g1_i1, TRINITY_DN49304_c1_g1_i1, TRINITY_DN48967_c2_g1_i1, TRINITY_DN62743_c2_g3_i1, TRINITY_DN65544_c6_g1_i1, TRINITY_DN47322_c0_g2_i1, TRINITY_DN65544_c10_g1_i1, TRINITY_DN54500_c2_g1_i1, TRINITY_DN65573_c4_g1_i1, TRINITY_DN65486_c2_g1_i1, TRINITY_DN47297_c2_g1_i1, TRINITY_DN61230_c1_g1_i1, TRINITY_DN50443_c1_g1_i1, TRINITY_…	map00980
Metabolism of xenobiotics by cytochrome P450	217	dehydrogenase	ec:1.1.1.1	1	TRINITY_DN47826_c0_g1_i1	map00980
Metabolism of xenobiotics by cytochrome P450	217	dehydrogenase [NAD(P)+]	ec:1.2.1.5	2	TRINITY_DN57151_c1_g1_i1, TRINITY_DN52174_c4_g1_i1	map00980
Metabolism of xenobiotics by cytochrome P450	217	1-naphthol glucuronyltransferase	ec:2.4.1.17	17	TRINITY_DN54766_c3_g3_i1, TRINITY_DN55415_c1_g1_i1, TRINITY_DN51499_c1_g1_i1, TRINITY_DN50200_c2_g1_i1, TRINITY_DN61696_c1_g2_i1, TRINITY_DN52822_c6_g1_i1, TRINITY_DN49341_c0_g2_i1, TRINITY_DN58223_c3_g1_i1, TRINITY_DN54252_c2_g2_i1, TRINITY_DN61696_c1_g8_i1, TRINITY_DN40695_c0_g2_i1, TRINITY_DN62211_c2_g1_i1, TRINITY_DN52822_c1_g1_i1, TRINITY_DN62544_c0_g1_i1, TRINITY_DN52378_c0_g1_i1, TRINITY_D…	map00980
Arginine and proline metabolism	23	aminotransferase	ec:2.6.1.13	3	TRINITY_DN59495_c0_g1_i1, TRINITY_DN54531_c5_g1_i1, TRINITY_DN59495_c0_g2_i1	map00330
Arginine and proline metabolism	23	5-kinase	ec:2.7.2.11	4	TRINITY_DN57559_c1_g1_i1, TRINITY_DN61982_c2_g1_i1, TRINITY_DN59329_c2_g1_i1, TRINITY_DN61982_c1_g1_i1	map00330
Arginine and proline metabolism	23	dehydrogenase	ec:1.2.1.41	3	TRINITY_DN61982_c2_g1_i1, TRINITY_DN59329_c2_g1_i1, TRINITY_DN61982_c1_g1_i1	map00330
Arginine and proline metabolism	23	synthase	ec:2.5.1.16	3	TRINITY_DN51616_c5_g1_i1, TRINITY_DN57639_c1_g1_i1, TRINITY_DN51751_c5_g1_i1	map00330
Arginine and proline metabolism	23	oxidase (propane-1,3-diamine-forming)	ec:1.5.3.14	2	TRINITY_DN47418_c1_g1_i1, TRINITY_DN54301_c7_g1_i1	map00330
Arginine and proline metabolism	23	synthase	ec:2.5.1.22	1	TRINITY_DN46136_c0_g1_i1	map00330
Arginine and proline metabolism	23	decarboxylase	ec:4.1.1.17	1	TRINITY_DN55340_c0_g1_i1	map00330
Arginine and proline metabolism	23	dehydrogenase (NAD+)	ec:1.2.1.3	4	TRINITY_DN57151_c1_g1_i1, TRINITY_DN58156_c3_g1_i1, TRINITY_DN52174_c4_g1_i1, TRINITY_DN50807_c0_g1_i1	map00330
Arginine and proline metabolism	23	reductase	ec:1.5.1.2	5	TRINITY_DN43504_c0_g2_i1, TRINITY_DN6056_c0_g1_i1, TRINITY_DN48659_c2_g1_i1, TRINITY_DN55804_c11_g1_i1, TRINITY_DN55804_c9_g1_i1	map00330
Caffeine metabolism	2	oxidase	ec:1.17.3.2	1	TRINITY_DN52936_c3_g1_i1	map00232
Caffeine metabolism	2	urate hydroxylase	ec:1.7.3.3	1	TRINITY_DN55124_c2_g1_i1	map00232
Purine metabolism	651	cyclo-ligase	ec:6.3.3.1	3	TRINITY_DN49806_c2_g1_i1, TRINITY_DN63008_c3_g3_i1, TRINITY_DN63008_c3_g4_i1	map00230
Purine metabolism	651	formyltransferase	ec:2.1.2.2	1	TRINITY_DN50459_c0_g1_i1	map00230
Purine metabolism	651	kinase	ec:2.7.4.8	2	TRINITY_DN52167_c2_g1_i1, TRINITY_DN56228_c3_g1_i1	map00230
Purine metabolism	651	kinase	ec:2.7.4.6	7	TRINITY_DN55837_c0_g1_i1, TRINITY_DN50251_c2_g2_i1, TRINITY_DN47052_c1_g1_i1, TRINITY_DN43673_c0_g1_i1, TRINITY_DN52024_c3_g2_i1, TRINITY_DN52024_c3_g1_i1, TRINITY_DN52952_c0_g1_i1	map00230
Purine metabolism	651	kinase	ec:2.7.4.3	4	TRINITY_DN45859_c0_g1_i1, TRINITY_DN51249_c0_g1_i1, TRINITY_DN54375_c0_g1_i1, TRINITY_DN54375_c0_g2_i1	map00230
Purine metabolism	651	ec:3.5.2.5 allantoinase	ec:3.5.2.5	1	TRINITY_DN55149_c0_g1_i1	map00230
Purine metabolism	651	adenylpyrophosphatase	ec:3.6.1.3	234	TRINITY_DN50906_c8_g1_i1, TRINITY_DN65260_c2_g1_i1, TRINITY_DN65398_c1_g2_i1, TRINITY_DN47298_c0_g1_i1, TRINITY_DN57229_c1_g1_i1, TRINITY_DN60574_c0_g2_i1, TRINITY_DN64180_c2_g1_i1, TRINITY_DN62976_c0_g1_i1, TRINITY_DN47202_c5_g1_i1, TRINITY_DN61706_c0_g2_i1, TRINITY_DN40279_c0_g3_i1, TRINITY_DN42396_c0_g1_i1, TRINITY_DN62337_c2_g1_i1, TRINITY_DN63101_c2_g1_i1, TRINITY_DN64023_c3_g1_i1, TRINITY_D…	map00230
Purine metabolism	651	diphosphate phosphatase	ec:3.6.1.6	2	TRINITY_DN56880_c0_g2_i1, TRINITY_DN56880_c0_g1_i1	map00230
Purine metabolism	651	diphosphatase	ec:3.6.1.9	2	TRINITY_DN60369_c4_g3_i1, TRINITY_DN47658_c0_g1_i1	map00230
Purine metabolism	651	carboxylase	ec:4.1.1.21	2	TRINITY_DN52971_c1_g1_i1, TRINITY_DN62114_c2_g1_i1	map00230
Purine metabolism	651	deiminase	ec:3.5.3.9	1	TRINITY_DN51091_c6_g1_i1	map00230
Purine metabolism	651	deaminase	ec:3.5.4.4	4	TRINITY_DN65507_c0_g1_i1, TRINITY_DN65507_c0_g2_i1, TRINITY_DN42208_c0_g1_i1, TRINITY_DN57279_c2_g1_i1	map00230
Purine metabolism	651	reductase	ec:1.17.4.1	4	TRINITY_DN63259_c0_g1_i1, TRINITY_DN61117_c2_g1_i1, TRINITY_DN59118_c0_g1_i1, TRINITY_DN61117_c1_g2_i1	map00230
Purine metabolism	651	kinase	ec:2.7.1.40	15	TRINITY_DN60343_c2_g2_i1, TRINITY_DN54738_c2_g1_i1, TRINITY_DN57432_c4_g1_i1, TRINITY_DN50106_c3_g1_i1, TRINITY_DN50106_c2_g6_i1, TRINITY_DN50106_c4_g1_i1, TRINITY_DN50106_c2_g3_i1, TRINITY_DN50106_c2_g1_i1, TRINITY_DN62057_c1_g1_i1, TRINITY_DN62658_c0_g1_i1, TRINITY_DN50214_c1_g1_i1, TRINITY_DN49957_c7_g1_i1, TRINITY_DN50106_c5_g1_i1, TRINITY_DN49957_c3_g1_i1, TRINITY_DN60343_c2_g1_i1	map00230
Purine metabolism	651	deaminase	ec:3.5.4.6	3	TRINITY_DN58229_c2_g1_i1, TRINITY_DN66970_c0_g2_i1, TRINITY_DN66970_c0_g1_i1	map00230
Purine metabolism	651	synthase	ec:6.3.2.6	2	TRINITY_DN52971_c1_g1_i1, TRINITY_DN62114_c2_g1_i1	map00230
Purine metabolism	651	phosphatase	ec:3.6.1.15	523	TRINITY_DN50906_c8_g1_i1, TRINITY_DN65260_c2_g1_i1, TRINITY_DN65398_c1_g2_i1, TRINITY_DN47298_c0_g1_i1, TRINITY_DN58799_c3_g1_i1, TRINITY_DN42396_c0_g1_i1, TRINITY_DN63101_c2_g1_i1, TRINITY_DN39452_c2_g1_i1, TRINITY_DN46985_c2_g1_i1, TRINITY_DN51158_c4_g1_i1, TRINITY_DN49425_c0_g1_i1, TRINITY_DN39716_c0_g1_i1, TRINITY_DN49176_c12_g1_i1, TRINITY_DN53496_c1_g1_i1, TRINITY_DN65447_c3_g1_i1, TRINITY_…	map00230
Purine metabolism	651	diphosphatase	ec:3.6.1.19	2	TRINITY_DN56256_c0_g1_i1, TRINITY_DN62244_c6_g1_i1	map00230
Purine metabolism	651	adenylyltransferase	ec:2.7.7.4	3	TRINITY_DN58337_c3_g1_i1, TRINITY_DN58337_c3_g2_i1, TRINITY_DN37475_c0_g3_i1	map00230
Purine metabolism	651	diphosphatase	ec:3.6.1.21	1	TRINITY_DN58708_c0_g1_i1	map00230
Purine metabolism	651	RNA polymerase	ec:2.7.7.6	8	TRINITY_DN52892_c0_g2_i1, TRINITY_DN63783_c5_g5_i1, TRINITY_DN63783_c5_g3_i1, TRINITY_DN56224_c0_g1_i1, TRINITY_DN63783_c5_g4_i1, TRINITY_DN50061_c4_g1_i1, TRINITY_DN62307_c5_g1_i1, TRINITY_DN58995_c0_g1_i1	map00230
Purine metabolism	651	DNA polymerase	ec:2.7.7.7	1	TRINITY_DN65597_c0_g4_i1	map00230
Purine metabolism	651	nucleotidyltransferase	ec:2.7.7.8	2	TRINITY_DN60161_c0_g1_i1, TRINITY_DN59666_c3_g1_i1	map00230
Purine metabolism	651	oxidase	ec:1.17.3.2	1	TRINITY_DN52936_c3_g1_i1	map00230
Purine metabolism	651	ligase	ec:6.3.4.13	7	TRINITY_DN64129_c5_g5_i1, TRINITY_DN59776_c2_g1_i1, TRINITY_DN64129_c5_g2_i1, TRINITY_DN64129_c5_g1_i1, TRINITY_DN64129_c5_g4_i1, TRINITY_DN57587_c1_g1_i1, TRINITY_DN59776_c3_g1_i1	map00230
Purine metabolism	651	diphosphokinase	ec:2.7.6.5	6	TRINITY_DN61070_c4_g1_i1, TRINITY_DN60816_c5_g1_i1, TRINITY_DN38788_c1_g1_i1, TRINITY_DN55815_c1_g1_i1, TRINITY_DN60502_c1_g1_i1, TRINITY_DN46355_c1_g1_i1	map00230
Purine metabolism	651	diphosphokinase	ec:2.7.6.1	3	TRINITY_DN49532_c0_g1_i1, TRINITY_DN52424_c1_g1_i1, TRINITY_DN49718_c0_g1_i1	map00230
Purine metabolism	651	dehydrogenase	ec:1.17.1.4	18	TRINITY_DN65607_c2_g4_i1, TRINITY_DN43565_c1_g1_i1, TRINITY_DN43157_c0_g1_i1, TRINITY_DN7612_c0_g1_i1, TRINITY_DN65607_c2_g1_i1, TRINITY_DN38187_c0_g1_i1, TRINITY_DN38187_c3_g1_i1, TRINITY_DN43157_c1_g1_i1, TRINITY_DN65607_c2_g2_i1, TRINITY_DN65607_c2_g3_i1, TRINITY_DN64424_c4_g1_i1, TRINITY_DN44040_c2_g1_i1, TRINITY_DN9832_c0_g1_i1, TRINITY_DN52936_c3_g1_i1, TRINITY_DN44040_c1_g1_i1, TRINITY_DN4…	map00230
Purine metabolism	651	urate hydroxylase	ec:1.7.3.3	1	TRINITY_DN55124_c2_g1_i1	map00230
Purine metabolism	651	uridine 5'-nucleotidase	ec:3.1.3.5	2	TRINITY_DN56408_c3_g1_i1, TRINITY_DN59734_c0_g2_i1	map00230
Purine metabolism	651	hydrolase	ec:3.5.2.17	1	TRINITY_DN56567_c1_g1_i1	map00230
Purine metabolism	651	deoxy-GTPase	ec:3.1.5.1	1	TRINITY_DN57979_c3_g1_i1	map00230
Purine metabolism	651	nucleosidase	ec:3.2.2.2	1	TRINITY_DN54612_c2_g1_i1	map00230
Purine metabolism	651	nucleosidase	ec:3.2.2.1	14	TRINITY_DN38806_c2_g1_i1, TRINITY_DN38806_c3_g1_i1, TRINITY_DN52513_c8_g1_i1, TRINITY_DN38806_c3_g2_i1, TRINITY_DN58016_c4_g3_i1, TRINITY_DN54612_c2_g1_i1, TRINITY_DN63279_c0_g4_i1, TRINITY_DN63279_c0_g3_i1, TRINITY_DN63279_c0_g1_i1, TRINITY_DN44207_c2_g1_i1, TRINITY_DN63279_c0_g2_i1, TRINITY_DN58016_c4_g1_i1, TRINITY_DN54173_c1_g1_i1, TRINITY_DN38806_c1_g1_i1	map00230
Purine metabolism	651	dehydrogenase	ec:1.1.1.205	2	TRINITY_DN59040_c1_g1_i1, TRINITY_DN46711_c0_g1_i1	map00230
Purine metabolism	651	3'-diphosphatase	ec:3.1.7.2	7	TRINITY_DN61070_c4_g1_i1, TRINITY_DN60816_c5_g1_i1, TRINITY_DN38788_c1_g1_i1, TRINITY_DN47658_c0_g1_i1, TRINITY_DN55815_c1_g1_i1, TRINITY_DN60502_c1_g1_i1, TRINITY_DN46355_c1_g1_i1	map00230
Purine metabolism	651	(alpha-D-glucose-1,6-bisphosphate-dependent)	ec:5.4.2.2	2	TRINITY_DN48711_c0_g2_i1, TRINITY_DN46429_c0_g1_i1	map00230
Purine metabolism	651	synthase	ec:6.3.5.3	2	TRINITY_DN65056_c1_g1_i1, TRINITY_DN44498_c0_g1_i1	map00230
Purine metabolism	651	phosphoribosyldiphosphate 5-amidotransferase	ec:2.4.2.14	2	TRINITY_DN50059_c0_g1_i1, TRINITY_DN64842_c1_g1_i1	map00230
Purine metabolism	651	phosphoribosyltransferase	ec:2.4.2.8	1	TRINITY_DN53896_c4_g1_i1	map00230
Purine metabolism	651	ec:3.5.1.5 urease	ec:3.5.1.5	1	TRINITY_DN63949_c4_g1_i1	map00230
Naphthalene degradation	1	dehydrogenase	ec:1.1.1.1	1	TRINITY_DN47826_c0_g1_i1	map00626
Carbon fixation pathways in prokaryotes	43	ligase	ec:6.3.4.3	1	TRINITY_DN65759_c8_g1_i1	map00720
Carbon fixation pathways in prokaryotes	43	reductase [NAD(P)H]	ec:1.5.1.20	2	TRINITY_DN57476_c1_g1_i1, TRINITY_DN61724_c4_g4_i1	map00720
Carbon fixation pathways in prokaryotes	43	dehydrogenase	ec:1.3.5.1	9	TRINITY_DN56479_c0_g3_i1, TRINITY_DN56479_c0_g4_i1, TRINITY_DN56479_c0_g2_i1, TRINITY_DN56479_c0_g1_i1, TRINITY_DN9593_c0_g1_i1, TRINITY_DN56479_c0_g6_i1, TRINITY_DN60143_c0_g1_i1, TRINITY_DN56479_c0_g5_i1, TRINITY_DN52451_c6_g1_i1	map00720
Carbon fixation pathways in prokaryotes	43	carboxylase	ec:4.1.1.31	9	TRINITY_DN54642_c4_g1_i1, TRINITY_DN47061_c1_g1_i1, TRINITY_DN42266_c0_g1_i1, TRINITY_DN53498_c0_g1_i1, TRINITY_DN50194_c4_g2_i1, TRINITY_DN55579_c2_g1_i1, TRINITY_DN49378_c0_g1_i1, TRINITY_DN53769_c0_g1_i1, TRINITY_DN53769_c0_g2_i1	map00720
Carbon fixation pathways in prokaryotes	43	hydratase	ec:4.2.1.2	1	TRINITY_DN55398_c0_g1_i1	map00720
Carbon fixation pathways in prokaryotes	43	cyclohydrolase	ec:3.5.4.9	1	TRINITY_DN65759_c8_g1_i1	map00720
Carbon fixation pathways in prokaryotes	43	ligase (ADP-forming)	ec:6.2.1.5	2	TRINITY_DN54712_c10_g1_i1, TRINITY_DN46133_c0_g1_i1	map00720
Carbon fixation pathways in prokaryotes	43	hydratase	ec:4.2.1.17	1	TRINITY_DN50255_c0_g1_i1	map00720
Carbon fixation pathways in prokaryotes	43	phosphate dikinase	ec:2.7.9.1	2	TRINITY_DN51242_c0_g1_i1, TRINITY_DN52015_c7_g1_i1	map00720
Carbon fixation pathways in prokaryotes	43	dehydrogenase	ec:1.1.1.37	11	TRINITY_DN57405_c1_g1_i1, TRINITY_DN57923_c4_g1_i1, TRINITY_DN57405_c1_g2_i1, TRINITY_DN63686_c6_g1_i1, TRINITY_DN47042_c0_g1_i1, TRINITY_DN57405_c1_g3_i1, TRINITY_DN41712_c0_g1_i1, TRINITY_DN50197_c3_g3_i1, TRINITY_DN45225_c0_g1_i1, TRINITY_DN57405_c0_g1_i1, TRINITY_DN57923_c3_g1_i1	map00720
Carbon fixation pathways in prokaryotes	43	dehydrogenase	ec:1.1.1.35	3	TRINITY_DN61363_c1_g1_i1, TRINITY_DN50255_c0_g1_i1, TRINITY_DN56052_c5_g1_i1	map00720
Carbon fixation pathways in prokaryotes	43	dehydrogenase (NADP+)	ec:1.1.1.42	3	TRINITY_DN54141_c0_g1_i1, TRINITY_DN54398_c6_g1_i1, TRINITY_DN44433_c2_g1_i1	map00720
Carbon fixation pathways in prokaryotes	43	dehydrogenase (NADP+)	ec:1.5.1.5	1	TRINITY_DN65759_c8_g1_i1	map00720
Lipoic acid metabolism	10	synthase	ec:2.8.1.8	9	TRINITY_DN42136_c0_g1_i1, TRINITY_DN53204_c5_g2_i1, TRINITY_DN45673_c0_g5_i1, TRINITY_DN45673_c0_g2_i1, TRINITY_DN52365_c3_g1_i1, TRINITY_DN45673_c0_g6_i1, TRINITY_DN45673_c0_g1_i1, TRINITY_DN45673_c0_g3_i1, TRINITY_DN45673_c0_g4_i1	map00785
Lipoic acid metabolism	10	transferase	ec:2.3.1.181	1	TRINITY_DN65401_c2_g3_i1	map00785
Chloroalkane and chloroalkene degradation	5	dehydrogenase	ec:1.1.1.1	1	TRINITY_DN47826_c0_g1_i1	map00625
Chloroalkane and chloroalkene degradation	5	dehydrogenase (NAD+)	ec:1.2.1.3	4	TRINITY_DN57151_c1_g1_i1, TRINITY_DN58156_c3_g1_i1, TRINITY_DN52174_c4_g1_i1, TRINITY_DN50807_c0_g1_i1	map00625
Toluene degradation	4	maleylacetate enol-lactonase	ec:3.1.1.45	1	TRINITY_DN49807_c2_g1_i1	map00623
Toluene degradation	4	dehydrogenase	ec:1.1.1.35	3	TRINITY_DN61363_c1_g1_i1, TRINITY_DN50255_c0_g1_i1, TRINITY_DN56052_c5_g1_i1	map00623
Valine, leucine and isoleucine biosynthesis	4	dehydratase	ec:4.2.1.9	1	TRINITY_DN54972_c0_g1_i1	map00290
Valine, leucine and isoleucine biosynthesis	4	ammonia-lyase	ec:4.3.1.19	1	TRINITY_DN47697_c0_g2_i1	map00290
Valine, leucine and isoleucine biosynthesis	4	reductoisomerase (NADP+)	ec:1.1.1.86	2	TRINITY_DN58270_c3_g1_i1, TRINITY_DN57895_c0_g1_i1	map00290
Photosynthesis	5	reductase	ec:1.10.9.1	1	TRINITY_DN50078_c1_g5_i1	map00195
Photosynthesis	5	reductase	ec:1.18.1.2	4	TRINITY_DN55490_c2_g2_i1, TRINITY_DN55490_c2_g1_i1, TRINITY_DN55696_c1_g1_i1, TRINITY_DN59100_c4_g1_i1	map00195
Ubiquinone and other terpenoid-quinone biosynthesis	8	synthase	ec:2.2.1.9	1	TRINITY_DN64301_c1_g1_i1	map00130
Ubiquinone and other terpenoid-quinone biosynthesis	8	4-monooxygenase	ec:1.14.13.11	2	TRINITY_DN52051_c9_g2_i1, TRINITY_DN52051_c2_g1_i1	map00130
Ubiquinone and other terpenoid-quinone biosynthesis	8	ligase	ec:6.2.1.26	1	TRINITY_DN9776_c0_g1_i1	map00130
Ubiquinone and other terpenoid-quinone biosynthesis	8	ligase	ec:6.2.1.12	1	TRINITY_DN54217_c4_g1_i1	map00130
Ubiquinone and other terpenoid-quinone biosynthesis	8	dehydrogenase (quinone)	ec:1.6.5.2	1	TRINITY_DN52240_c2_g1_i1	map00130
Ubiquinone and other terpenoid-quinone biosynthesis	8	synthase	ec:5.4.4.2	2	TRINITY_DN41583_c0_g1_i1, TRINITY_DN46816_c1_g1_i1	map00130
Pyruvate metabolism	71	carboxykinase (ATP)	ec:4.1.1.49	1	TRINITY_DN52281_c2_g1_i1	map00620
Pyruvate metabolism	71	acetylphosphatase	ec:3.6.1.7	1	TRINITY_DN39613_c0_g1_i1	map00620
Pyruvate metabolism	71	carboxylase	ec:4.1.1.31	9	TRINITY_DN54642_c4_g1_i1, TRINITY_DN47061_c1_g1_i1, TRINITY_DN42266_c0_g1_i1, TRINITY_DN53498_c0_g1_i1, TRINITY_DN50194_c4_g2_i1, TRINITY_DN55579_c2_g1_i1, TRINITY_DN49378_c0_g1_i1, TRINITY_DN53769_c0_g1_i1, TRINITY_DN53769_c0_g2_i1	map00620
Pyruvate metabolism	71	hydratase	ec:4.2.1.2	1	TRINITY_DN55398_c0_g1_i1	map00620
Pyruvate metabolism	71	kinase	ec:2.7.1.40	15	TRINITY_DN60343_c2_g2_i1, TRINITY_DN54738_c2_g1_i1, TRINITY_DN57432_c4_g1_i1, TRINITY_DN50106_c3_g1_i1, TRINITY_DN50106_c2_g6_i1, TRINITY_DN50106_c4_g1_i1, TRINITY_DN50106_c2_g3_i1, TRINITY_DN50106_c2_g1_i1, TRINITY_DN62057_c1_g1_i1, TRINITY_DN62658_c0_g1_i1, TRINITY_DN50214_c1_g1_i1, TRINITY_DN49957_c7_g1_i1, TRINITY_DN50106_c5_g1_i1, TRINITY_DN49957_c3_g1_i1, TRINITY_DN60343_c2_g1_i1	map00620
Pyruvate metabolism	71	acetyltransferase	ec:2.3.1.12	2	TRINITY_DN53098_c4_g1_i1, TRINITY_DN51962_c0_g1_i1	map00620
Pyruvate metabolism	71	dehydrogenase	ec:1.8.1.4	3	TRINITY_DN52639_c1_g1_i1, TRINITY_DN54423_c0_g2_i1, TRINITY_DN62095_c1_g1_i1	map00620
Pyruvate metabolism	71	hydrolase	ec:3.1.2.6	4	TRINITY_DN53131_c2_g2_i1, TRINITY_DN53131_c2_g1_i1, TRINITY_DN54317_c5_g1_i1, TRINITY_DN47122_c2_g1_i1	map00620
Pyruvate metabolism	71	reductase (NADP+)	ec:1.1.1.79	4	TRINITY_DN57444_c0_g1_i1, TRINITY_DN47591_c1_g1_i1, TRINITY_DN44549_c5_g1_i1, TRINITY_DN51070_c0_g1_i1	map00620
Pyruvate metabolism	71	phosphate dikinase	ec:2.7.9.1	2	TRINITY_DN51242_c0_g1_i1, TRINITY_DN52015_c7_g1_i1	map00620
Pyruvate metabolism	71	dehydrogenase (NAD+)	ec:1.2.1.3	4	TRINITY_DN57151_c1_g1_i1, TRINITY_DN58156_c3_g1_i1, TRINITY_DN52174_c4_g1_i1, TRINITY_DN50807_c0_g1_i1	map00620
Pyruvate metabolism	71	dehydrogenase (NADP+)	ec:1.1.1.82	1	TRINITY_DN51464_c0_g1_i1	map00620
Pyruvate metabolism	71	dehydrogenase	ec:1.1.1.37	11	TRINITY_DN57405_c1_g1_i1, TRINITY_DN57923_c4_g1_i1, TRINITY_DN57405_c1_g2_i1, TRINITY_DN63686_c6_g1_i1, TRINITY_DN47042_c0_g1_i1, TRINITY_DN57405_c1_g3_i1, TRINITY_DN41712_c0_g1_i1, TRINITY_DN50197_c3_g3_i1, TRINITY_DN45225_c0_g1_i1, TRINITY_DN57405_c0_g1_i1, TRINITY_DN57923_c3_g1_i1	map00620
Pyruvate metabolism	71	lyase	ec:4.4.1.5	4	TRINITY_DN53733_c1_g1_i1, TRINITY_DN51798_c0_g1_i1, TRINITY_DN45313_c0_g1_i1, TRINITY_DN44732_c0_g1_i1	map00620
Pyruvate metabolism	71	dehydrogenase (decarboxylating)	ec:1.1.1.39	1	TRINITY_DN65314_c3_g1_i1	map00620
Pyruvate metabolism	71	dehydrogenase (oxaloacetate-decarboxylating)	ec:1.1.1.38	1	TRINITY_DN65314_c3_g1_i1	map00620
Pyruvate metabolism	71	synthase	ec:2.3.3.9	2	TRINITY_DN60755_c2_g1_i1, TRINITY_DN60755_c2_g2_i1	map00620
Pyruvate metabolism	71	dehydrogenase (acetyl-transferring)	ec:1.2.4.1	6	TRINITY_DN49780_c0_g1_i1, TRINITY_DN50872_c1_g1_i1, TRINITY_DN51176_c0_g1_i1, TRINITY_DN49780_c5_g1_i1, TRINITY_DN50879_c0_g1_i1, TRINITY_DN49780_c7_g1_i1	map00620
Polyketide sugar unit biosynthesis	1	4,6-dehydratase	ec:4.2.1.46	1	TRINITY_DN46101_c0_g1_i1	map00523
Oxidative phosphorylation	69	diphosphatase	ec:3.6.1.1	20	TRINITY_DN60046_c1_g1_i1, TRINITY_DN55524_c5_g1_i1, TRINITY_DN54223_c6_g1_i1, TRINITY_DN70164_c0_g1_i1, TRINITY_DN51612_c0_g1_i1, TRINITY_DN48250_c0_g1_i1, TRINITY_DN55530_c1_g1_i1, TRINITY_DN52451_c13_g3_i1, TRINITY_DN55841_c0_g1_i1, TRINITY_DN55530_c1_g2_i1, TRINITY_DN54223_c5_g1_i1, TRINITY_DN55530_c3_g1_i1, TRINITY_DN55530_c3_g2_i1, TRINITY_DN55841_c2_g1_i1, TRINITY_DN55841_c1_g1_i1, TRINITY_…	map00190
Oxidative phosphorylation	69	dehydrogenase	ec:1.3.5.1	9	TRINITY_DN56479_c0_g3_i1, TRINITY_DN56479_c0_g4_i1, TRINITY_DN56479_c0_g2_i1, TRINITY_DN56479_c0_g1_i1, TRINITY_DN9593_c0_g1_i1, TRINITY_DN56479_c0_g6_i1, TRINITY_DN60143_c0_g1_i1, TRINITY_DN56479_c0_g5_i1, TRINITY_DN52451_c6_g1_i1	map00190
Oxidative phosphorylation	69	ATPase	ec:3.6.3.6	13	TRINITY_DN59091_c3_g1_i1, TRINITY_DN61167_c5_g1_i1, TRINITY_DN46194_c0_g1_i1, TRINITY_DN61167_c1_g1_i1, TRINITY_DN48137_c0_g1_i1, TRINITY_DN42836_c1_g1_i1, TRINITY_DN61167_c3_g1_i1, TRINITY_DN64315_c2_g1_i1, TRINITY_DN40279_c0_g2_i1, TRINITY_DN40279_c0_g3_i1, TRINITY_DN59091_c0_g1_i1, TRINITY_DN56673_c1_g1_i1, TRINITY_DN61167_c4_g1_i1	map00190
Oxidative phosphorylation	69	oxidase	ec:1.9.3.1	15	TRINITY_DN54734_c3_g2_i1, TRINITY_DN58947_c1_g1_i1, TRINITY_DN49798_c0_g1_i1, TRINITY_DN57281_c6_g2_i1, TRINITY_DN46311_c0_g1_i1, TRINITY_DN42260_c0_g1_i1, TRINITY_DN69841_c0_g1_i1, TRINITY_DN7276_c0_g1_i1, TRINITY_DN48707_c0_g1_i1, TRINITY_DN37990_c0_g1_i1, TRINITY_DN63023_c0_g1_i1, TRINITY_DN59499_c0_g1_i1, TRINITY_DN62234_c3_g1_i1, TRINITY_DN51196_c2_g1_i1, TRINITY_DN7276_c1_g1_i1	map00190
Oxidative phosphorylation	69	reductase (H+-translocating)	ec:1.6.5.3	3	TRINITY_DN60125_c1_g1_i1, TRINITY_DN62234_c4_g1_i1, TRINITY_DN61078_c3_g2_i1	map00190
Oxidative phosphorylation	69	reductase	ec:1.10.2.2	7	TRINITY_DN51172_c0_g1_i1, TRINITY_DN45861_c0_g1_i1, TRINITY_DN58201_c4_g1_i1, TRINITY_DN46606_c0_g1_i1, TRINITY_DN46575_c0_g1_i1, TRINITY_DN47447_c1_g1_i1, TRINITY_DN44057_c0_g1_i1	map00190
Oxidative phosphorylation	69	dehydrogenase	ec:1.6.99.3	5	TRINITY_DN60125_c1_g1_i1, TRINITY_DN62234_c4_g1_i1, TRINITY_DN61078_c3_g2_i1, TRINITY_DN57766_c0_g1_i1, TRINITY_DN52429_c0_g1_i1	map00190
Pentose phosphate pathway	73	1-phosphotransferase	ec:2.7.1.90	7	TRINITY_DN46753_c0_g1_i1, TRINITY_DN49487_c0_g2_i1, TRINITY_DN55050_c0_g1_i1, TRINITY_DN64395_c1_g1_i1, TRINITY_DN46488_c0_g2_i1, TRINITY_DN43087_c0_g1_i1, TRINITY_DN51479_c0_g1_i1	map00030
Pentose phosphate pathway	73	aldolase	ec:4.1.2.13	12	TRINITY_DN42189_c0_g1_i1, TRINITY_DN59861_c4_g2_i1, TRINITY_DN57691_c1_g1_i1, TRINITY_DN57691_c0_g1_i1, TRINITY_DN43211_c0_g1_i1, TRINITY_DN54088_c1_g1_i1, TRINITY_DN37185_c0_g2_i1, TRINITY_DN47696_c0_g1_i1, TRINITY_DN37185_c0_g3_i1, TRINITY_DN57691_c2_g1_i1, TRINITY_DN37185_c0_g1_i1, TRINITY_DN57691_c0_g2_i1	map00030
Pentose phosphate pathway	73	dihydroxyacetonetransferase	ec:2.2.1.2	1	TRINITY_DN52408_c0_g1_i1	map00030
Pentose phosphate pathway	73	glycolaldehydetransferase	ec:2.2.1.1	4	TRINITY_DN62639_c0_g2_i1, TRINITY_DN49657_c0_g1_i1, TRINITY_DN37124_c1_g1_i1, TRINITY_DN62639_c0_g1_i1	map00030
Pentose phosphate pathway	73	deoxyribokinase	ec:2.7.1.15	10	TRINITY_DN50070_c1_g3_i1, TRINITY_DN59738_c9_g1_i1, TRINITY_DN50070_c1_g2_i1, TRINITY_DN54655_c4_g1_i1, TRINITY_DN58196_c0_g2_i1, TRINITY_DN50070_c1_g1_i1, TRINITY_DN56248_c2_g6_i1, TRINITY_DN54655_c2_g1_i1, TRINITY_DN57920_c5_g2_i1, TRINITY_DN54655_c5_g1_i1	map00030
Pentose phosphate pathway	73	phosphohexokinase	ec:2.7.1.11	7	TRINITY_DN46753_c0_g1_i1, TRINITY_DN49487_c0_g2_i1, TRINITY_DN55050_c0_g1_i1, TRINITY_DN64395_c1_g1_i1, TRINITY_DN46488_c0_g2_i1, TRINITY_DN43087_c0_g1_i1, TRINITY_DN51479_c0_g1_i1	map00030
Pentose phosphate pathway	73	3-epimerase	ec:5.1.3.1	2	TRINITY_DN46612_c0_g1_i1, TRINITY_DN49448_c0_g1_i1	map00030
Pentose phosphate pathway	73	hexose diphosphatase	ec:3.1.3.11	5	TRINITY_DN50661_c0_g1_i1, TRINITY_DN54223_c6_g2_i1, TRINITY_DN49443_c6_g1_i1, TRINITY_DN62612_c2_g1_i1, TRINITY_DN46850_c0_g1_i1	map00030
Pentose phosphate pathway	73	diphosphokinase	ec:2.7.6.1	3	TRINITY_DN49532_c0_g1_i1, TRINITY_DN52424_c1_g1_i1, TRINITY_DN49718_c0_g1_i1	map00030
Pentose phosphate pathway	73	phosphogluconolactonase	ec:3.1.1.31	4	TRINITY_DN55447_c1_g1_i1, TRINITY_DN54865_c2_g3_i1, TRINITY_DN48195_c0_g1_i1, TRINITY_DN55901_c2_g2_i1	map00030
Pentose phosphate pathway	73	isomerase	ec:5.3.1.6	3	TRINITY_DN43229_c0_g1_i1, TRINITY_DN52699_c1_g1_i1, TRINITY_DN52699_c1_g2_i1	map00030
Pentose phosphate pathway	73	isomerase	ec:5.3.1.9	2	TRINITY_DN59230_c2_g1_i1, TRINITY_DN52995_c2_g2_i1	map00030
Pentose phosphate pathway	73	dehydrogenase (NADP+-dependent, decarboxylating)	ec:1.1.1.44	12	TRINITY_DN57786_c1_g1_i1, TRINITY_DN53284_c0_g1_i1, TRINITY_DN57786_c1_g2_i1, TRINITY_DN53899_c5_g1_i1, TRINITY_DN57938_c2_g1_i1, TRINITY_DN47591_c1_g1_i1, TRINITY_DN52510_c0_g1_i1, TRINITY_DN57938_c2_g2_i1, TRINITY_DN57786_c2_g1_i1, TRINITY_DN51176_c0_g1_i1, TRINITY_DN57786_c2_g2_i1, TRINITY_DN62227_c2_g1_i1	map00030
Pentose phosphate pathway	73	dehydrogenase (NADP+)	ec:1.1.1.49	6	TRINITY_DN61839_c4_g1_i1, TRINITY_DN49530_c8_g1_i1, TRINITY_DN51476_c7_g1_i1, TRINITY_DN49774_c0_g1_i1, TRINITY_DN54306_c3_g1_i1, TRINITY_DN52501_c1_g1_i1	map00030
Pentose phosphate pathway	73	(alpha-D-glucose-1,6-bisphosphate-dependent)	ec:5.4.2.2	2	TRINITY_DN48711_c0_g2_i1, TRINITY_DN46429_c0_g1_i1	map00030
Methane metabolism	59	hydroxymethyltransferase	ec:2.1.2.1	3	TRINITY_DN56893_c0_g1_i1, TRINITY_DN46831_c1_g1_i1, TRINITY_DN45979_c0_g1_i1	map00680
Methane metabolism	59	aldolase	ec:4.1.2.13	12	TRINITY_DN42189_c0_g1_i1, TRINITY_DN59861_c4_g2_i1, TRINITY_DN57691_c1_g1_i1, TRINITY_DN57691_c0_g1_i1, TRINITY_DN43211_c0_g1_i1, TRINITY_DN54088_c1_g1_i1, TRINITY_DN37185_c0_g2_i1, TRINITY_DN47696_c0_g1_i1, TRINITY_DN37185_c0_g3_i1, TRINITY_DN57691_c2_g1_i1, TRINITY_DN37185_c0_g1_i1, TRINITY_DN57691_c0_g2_i1	map00680
Methane metabolism	59	carboxylase	ec:4.1.1.31	9	TRINITY_DN54642_c4_g1_i1, TRINITY_DN47061_c1_g1_i1, TRINITY_DN42266_c0_g1_i1, TRINITY_DN53498_c0_g1_i1, TRINITY_DN50194_c4_g2_i1, TRINITY_DN55579_c2_g1_i1, TRINITY_DN49378_c0_g1_i1, TRINITY_DN53769_c0_g1_i1, TRINITY_DN53769_c0_g2_i1	map00680
Methane metabolism	59	transaminase	ec:2.6.1.52	1	TRINITY_DN54922_c0_g1_i1	map00680
Methane metabolism	59	phosphohexokinase	ec:2.7.1.11	7	TRINITY_DN46753_c0_g1_i1, TRINITY_DN49487_c0_g2_i1, TRINITY_DN55050_c0_g1_i1, TRINITY_DN64395_c1_g1_i1, TRINITY_DN46488_c0_g2_i1, TRINITY_DN43087_c0_g1_i1, TRINITY_DN51479_c0_g1_i1	map00680
Methane metabolism	59	hexose diphosphatase	ec:3.1.3.11	5	TRINITY_DN50661_c0_g1_i1, TRINITY_DN54223_c6_g2_i1, TRINITY_DN49443_c6_g1_i1, TRINITY_DN62612_c2_g1_i1, TRINITY_DN46850_c0_g1_i1	map00680
Methane metabolism	59	dehydrogenase	ec:1.1.1.95	4	TRINITY_DN53959_c1_g1_i1, TRINITY_DN51642_c2_g1_i1, TRINITY_DN52165_c1_g3_i1, TRINITY_DN6183_c0_g1_i1	map00680
Methane metabolism	59	hydratase	ec:4.2.1.11	7	TRINITY_DN49468_c2_g1_i1, TRINITY_DN48143_c0_g1_i1, TRINITY_DN45589_c0_g1_i1, TRINITY_DN46428_c1_g1_i1, TRINITY_DN52333_c2_g1_i1, TRINITY_DN52333_c1_g1_i1, TRINITY_DN63884_c4_g2_i1	map00680
Methane metabolism	59	dehydrogenase	ec:1.2.1.2	2	TRINITY_DN53959_c1_g1_i1, TRINITY_DN6183_c0_g1_i1	map00680
Methane metabolism	59	dehydrogenase	ec:1.1.1.37	11	TRINITY_DN57405_c1_g1_i1, TRINITY_DN57923_c4_g1_i1, TRINITY_DN57405_c1_g2_i1, TRINITY_DN63686_c6_g1_i1, TRINITY_DN47042_c0_g1_i1, TRINITY_DN57405_c1_g3_i1, TRINITY_DN41712_c0_g1_i1, TRINITY_DN50197_c3_g3_i1, TRINITY_DN45225_c0_g1_i1, TRINITY_DN57405_c0_g1_i1, TRINITY_DN57923_c3_g1_i1	map00680
Amino sugar and nucleotide sugar metabolism	122	transaminase (isomerizing)	ec:2.6.1.16	1	TRINITY_DN58774_c2_g1_i1	map00520
Amino sugar and nucleotide sugar metabolism	122	galacturonokinase (phosphorylating) D-galacturonic acid kinase	ec:2.7.1.44	1	TRINITY_DN60163_c6_g1_i1	map00520
Amino sugar and nucleotide sugar metabolism	122	glucokinase (phosphorylating)	ec:2.7.1.2	7	TRINITY_DN57730_c1_g2_i1, TRINITY_DN55934_c5_g1_i1, TRINITY_DN56800_c0_g1_i1, TRINITY_DN58525_c4_g1_i1, TRINITY_DN60263_c1_g1_i1, TRINITY_DN58506_c0_g1_i1, TRINITY_DN62623_c2_g1_i1	map00520
Amino sugar and nucleotide sugar metabolism	122	hexokinase type IV glucokinase	ec:2.7.1.1	10	TRINITY_DN57730_c1_g2_i1, TRINITY_DN55934_c5_g1_i1, TRINITY_DN56800_c0_g1_i1, TRINITY_DN56248_c2_g6_i1, TRINITY_DN58525_c4_g1_i1, TRINITY_DN60263_c1_g1_i1, TRINITY_DN58506_c0_g1_i1, TRINITY_DN47932_c0_g1_i1, TRINITY_DN57954_c1_g1_i1, TRINITY_DN62623_c2_g1_i1	map00520
Amino sugar and nucleotide sugar metabolism	122	mannokinase (phosphorylating)	ec:2.7.1.7	7	TRINITY_DN57730_c1_g2_i1, TRINITY_DN55934_c5_g1_i1, TRINITY_DN56800_c0_g1_i1, TRINITY_DN58525_c4_g1_i1, TRINITY_DN60263_c1_g1_i1, TRINITY_DN58506_c0_g1_i1, TRINITY_DN62623_c2_g1_i1	map00520
Amino sugar and nucleotide sugar metabolism	122	galactokinase (phosphorylating)	ec:2.7.1.6	2	TRINITY_DN60163_c6_g1_i1, TRINITY_DN55260_c1_g1_i1	map00520
Amino sugar and nucleotide sugar metabolism	122	fructokinase (phosphorylating)	ec:2.7.1.4	10	TRINITY_DN57730_c1_g2_i1, TRINITY_DN55934_c5_g1_i1, TRINITY_DN56800_c0_g1_i1, TRINITY_DN56248_c2_g6_i1, TRINITY_DN58525_c4_g1_i1, TRINITY_DN60263_c1_g1_i1, TRINITY_DN58506_c0_g1_i1, TRINITY_DN47932_c0_g1_i1, TRINITY_DN57954_c1_g1_i1, TRINITY_DN62623_c2_g1_i1	map00520
Amino sugar and nucleotide sugar metabolism	122	4-epimerase	ec:5.1.3.2	3	TRINITY_DN54634_c4_g1_i1, TRINITY_DN63118_c0_g1_i1, TRINITY_DN52526_c4_g1_i1	map00520
Amino sugar and nucleotide sugar metabolism	122	synthase	ec:1.1.1.271	1	TRINITY_DN51917_c0_g1_i1	map00520
Amino sugar and nucleotide sugar metabolism	122	isomerase	ec:5.3.1.8	6	TRINITY_DN57952_c7_g1_i1, TRINITY_DN57952_c7_g2_i1, TRINITY_DN57952_c1_g2_i1, TRINITY_DN57952_c1_g1_i1, TRINITY_DN50029_c0_g1_i1, TRINITY_DN57952_c5_g1_i1	map00520
Amino sugar and nucleotide sugar metabolism	122	isomerase	ec:5.3.1.9	2	TRINITY_DN59230_c2_g1_i1, TRINITY_DN52995_c2_g2_i1	map00520
Amino sugar and nucleotide sugar metabolism	122	end alpha-L-arabinofuranosidase	ec:3.2.1.55	15	TRINITY_DN55734_c3_g1_i1, TRINITY_DN3864_c0_g1_i1, TRINITY_DN55491_c3_g1_i1, TRINITY_DN57771_c0_g1_i1, TRINITY_DN55491_c2_g1_i1, TRINITY_DN55491_c1_g1_i1, TRINITY_DN64310_c0_g1_i1, TRINITY_DN49000_c3_g1_i1, TRINITY_DN59855_c4_g1_i1, TRINITY_DN62825_c3_g1_i1, TRINITY_DN55546_c2_g1_i1, TRINITY_DN62825_c3_g2_i1, TRINITY_DN55491_c0_g1_i1, TRINITY_DN41485_c0_g1_i1, TRINITY_DN55734_c2_g1_i1	map00520
Amino sugar and nucleotide sugar metabolism	122	adenylyltransferase	ec:2.7.7.27	9	TRINITY_DN61226_c1_g1_i1, TRINITY_DN52044_c3_g2_i1, TRINITY_DN62527_c5_g1_i1, TRINITY_DN53804_c0_g1_i1, TRINITY_DN45696_c0_g1_i1, TRINITY_DN53061_c3_g1_i1, TRINITY_DN53061_c3_g2_i1, TRINITY_DN48285_c0_g1_i1, TRINITY_DN50684_c1_g1_i1	map00520
Amino sugar and nucleotide sugar metabolism	122	diphosphorylase	ec:2.7.7.23	1	TRINITY_DN63178_c2_g1_i1	map00520
Amino sugar and nucleotide sugar metabolism	122	uridylyltransferase	ec:2.7.7.12	1	TRINITY_DN55349_c4_g1_i1	map00520
Amino sugar and nucleotide sugar metabolism	122	N-acetyltransferase	ec:2.3.1.4	1	TRINITY_DN50191_c0_g1_i1	map00520
Amino sugar and nucleotide sugar metabolism	122	(alpha-D-glucose-1,6-bisphosphate-dependent)	ec:5.4.2.2	2	TRINITY_DN48711_c0_g2_i1, TRINITY_DN46429_c0_g1_i1	map00520
Amino sugar and nucleotide sugar metabolism	122	mutase	ec:5.4.2.3	3	TRINITY_DN59138_c0_g1_i1, TRINITY_DN59138_c1_g1_i1, TRINITY_DN59138_c0_g2_i1	map00520
Amino sugar and nucleotide sugar metabolism	122	mannose phosphomutase	ec:5.4.2.8	3	TRINITY_DN47786_c4_g1_i1, TRINITY_DN63438_c3_g1_i1, TRINITY_DN57119_c9_g4_i1	map00520
Amino sugar and nucleotide sugar metabolism	122	6-dehydrogenase	ec:1.1.1.22	1	TRINITY_DN49428_c0_g1_i1	map00520
Amino sugar and nucleotide sugar metabolism	122	4-alpha-galacturonosyltransferase	ec:2.4.1.43	30	TRINITY_DN65373_c3_g6_i1, TRINITY_DN65373_c3_g2_i1, TRINITY_DN45102_c1_g1_i1, TRINITY_DN61934_c2_g1_i1, TRINITY_DN59832_c6_g1_i1, TRINITY_DN65373_c3_g4_i1, TRINITY_DN53491_c2_g1_i1, TRINITY_DN40310_c0_g1_i1, TRINITY_DN60338_c2_g2_i1, TRINITY_DN60414_c2_g1_i1, TRINITY_DN60979_c0_g1_i1, TRINITY_DN60338_c1_g1_i1, TRINITY_DN60645_c2_g1_i1, TRINITY_DN61397_c1_g1_i1, TRINITY_DN43063_c0_g2_i1, TRINITY_D…	map00520
Amino sugar and nucleotide sugar metabolism	122	1,4-beta-xylosidase	ec:3.2.1.37	10	TRINITY_DN64310_c0_g1_i1, TRINITY_DN59855_c4_g1_i1, TRINITY_DN62825_c3_g1_i1, TRINITY_DN3864_c0_g1_i1, TRINITY_DN55491_c3_g1_i1, TRINITY_DN62825_c3_g2_i1, TRINITY_DN55491_c0_g1_i1, TRINITY_DN41485_c0_g1_i1, TRINITY_DN55491_c2_g1_i1, TRINITY_DN55491_c1_g1_i1	map00520
Amino sugar and nucleotide sugar metabolism	122	chitodextrinase	ec:3.2.1.14	31	TRINITY_DN47561_c1_g1_i1, TRINITY_DN58801_c2_g1_i1, TRINITY_DN48572_c2_g1_i1, TRINITY_DN48507_c1_g2_i1, TRINITY_DN39087_c1_g3_i1, TRINITY_DN52946_c1_g3_i1, TRINITY_DN48572_c1_g2_i1, TRINITY_DN39087_c0_g2_i1, TRINITY_DN54463_c0_g2_i1, TRINITY_DN46358_c0_g1_i1, TRINITY_DN48448_c2_g1_i1, TRINITY_DN48572_c0_g1_i1, TRINITY_DN48729_c0_g1_i1, TRINITY_DN52946_c1_g1_i1, TRINITY_DN52956_c0_g1_i1, TRINITY_D…	map00520
Nitrogen metabolism	23	dehydratase	ec:4.2.1.1	1	TRINITY_DN47346_c0_g1_i1	map00910
Nitrogen metabolism	23	ligase	ec:6.3.1.2	6	TRINITY_DN48609_c4_g1_i1, TRINITY_DN48609_c4_g2_i1, TRINITY_DN45063_c0_g1_i1, TRINITY_DN46842_c4_g1_i1, TRINITY_DN61965_c4_g1_i1, TRINITY_DN48609_c3_g1_i1	map00910
Nitrogen metabolism	23	synthase (ferredoxin)	ec:1.4.7.1	1	TRINITY_DN55433_c0_g1_i1	map00910
Nitrogen metabolism	23	monooxygenase	ec:1.13.12.16	3	TRINITY_DN48972_c2_g1_i1, TRINITY_DN55627_c1_g1_i1, TRINITY_DN48972_c3_g1_i1	map00910
Nitrogen metabolism	23	reductase	ec:1.7.99.4	6	TRINITY_DN61794_c4_g2_i1, TRINITY_DN61794_c4_g1_i1, TRINITY_DN61794_c1_g1_i1, TRINITY_DN47743_c0_g1_i1, TRINITY_DN61794_c2_g1_i1, TRINITY_DN61794_c0_g1_i1	map00910
Nitrogen metabolism	23	reductase (NADPH)	ec:1.7.1.3	6	TRINITY_DN61794_c4_g2_i1, TRINITY_DN61794_c4_g1_i1, TRINITY_DN61794_c1_g1_i1, TRINITY_DN47743_c0_g1_i1, TRINITY_DN61794_c2_g1_i1, TRINITY_DN61794_c0_g1_i1	map00910
Nitrogen metabolism	23	cyanate lyase	ec:4.2.1.104	1	TRINITY_DN53543_c2_g1_i1	map00910
Nitrogen metabolism	23	synthase (NADH)	ec:1.4.1.14	3	TRINITY_DN68253_c0_g1_i1, TRINITY_DN48245_c1_g1_i1, TRINITY_DN60481_c1_g1_i1	map00910
Nitrogen metabolism	23	dehydrogenase [NAD(P)+]	ec:1.4.1.3	2	TRINITY_DN57263_c4_g1_i1, TRINITY_DN56394_c2_g1_i1	map00910
Nitrogen metabolism	23	dehydrogenase	ec:1.4.1.2	1	TRINITY_DN57263_c4_g1_i1	map00910
Glutathione metabolism	246	peroxidase	ec:1.11.1.9	9	TRINITY_DN62674_c5_g2_i1, TRINITY_DN48171_c2_g1_i1, TRINITY_DN44915_c0_g2_i1, TRINITY_DN51100_c4_g1_i1, TRINITY_DN44915_c0_g1_i1, TRINITY_DN59513_c1_g1_i1, TRINITY_DN46442_c0_g1_i1, TRINITY_DN41396_c0_g1_i1, TRINITY_DN48171_c3_g1_i1	map00480
Glutathione metabolism	246	reductase	ec:1.17.4.1	4	TRINITY_DN63259_c0_g1_i1, TRINITY_DN61117_c2_g1_i1, TRINITY_DN59118_c0_g1_i1, TRINITY_DN61117_c1_g2_i1	map00480
Glutathione metabolism	246	synthase	ec:6.3.2.3	5	TRINITY_DN63681_c1_g1_i1, TRINITY_DN56109_c4_g2_i1, TRINITY_DN62959_c4_g1_i1, TRINITY_DN62959_c4_g2_i1, TRINITY_DN58811_c5_g1_i1	map00480
Glutathione metabolism	246	ligase	ec:6.3.2.2	1	TRINITY_DN51530_c2_g1_i1	map00480
Glutathione metabolism	246	dehydrogenase (ascorbate)	ec:1.8.5.1	4	TRINITY_DN51287_c1_g1_i1, TRINITY_DN60858_c2_g1_i1, TRINITY_DN60858_c3_g1_i1, TRINITY_DN60860_c1_g5_i1	map00480
Glutathione metabolism	246	synthase	ec:2.5.1.16	3	TRINITY_DN51616_c5_g1_i1, TRINITY_DN57639_c1_g1_i1, TRINITY_DN51751_c5_g1_i1	map00480
Glutathione metabolism	246	transferase	ec:2.5.1.18	197	TRINITY_DN53584_c1_g1_i1, TRINITY_DN46500_c1_g1_i1, TRINITY_DN58380_c3_g1_i1, TRINITY_DN49304_c1_g1_i1, TRINITY_DN48967_c2_g1_i1, TRINITY_DN62743_c2_g3_i1, TRINITY_DN65544_c6_g1_i1, TRINITY_DN47322_c0_g2_i1, TRINITY_DN65544_c10_g1_i1, TRINITY_DN54500_c2_g1_i1, TRINITY_DN65573_c4_g1_i1, TRINITY_DN65486_c2_g1_i1, TRINITY_DN47297_c2_g1_i1, TRINITY_DN61230_c1_g1_i1, TRINITY_DN50443_c1_g1_i1, TRINITY_…	map00480
Glutathione metabolism	246	synthase	ec:2.5.1.22	1	TRINITY_DN46136_c0_g1_i1	map00480
Glutathione metabolism	246	decarboxylase	ec:4.1.1.17	1	TRINITY_DN55340_c0_g1_i1	map00480
Glutathione metabolism	246	reductase	ec:1.8.1.7	3	TRINITY_DN55006_c4_g1_i1, TRINITY_DN42323_c0_g2_i1, TRINITY_DN50039_c3_g1_i1	map00480
Glutathione metabolism	246	dehydrogenase (NADP+-dependent, decarboxylating)	ec:1.1.1.44	12	TRINITY_DN57786_c1_g1_i1, TRINITY_DN53284_c0_g1_i1, TRINITY_DN57786_c1_g2_i1, TRINITY_DN53899_c5_g1_i1, TRINITY_DN57938_c2_g1_i1, TRINITY_DN47591_c1_g1_i1, TRINITY_DN52510_c0_g1_i1, TRINITY_DN57938_c2_g2_i1, TRINITY_DN57786_c2_g1_i1, TRINITY_DN51176_c0_g1_i1, TRINITY_DN57786_c2_g2_i1, TRINITY_DN62227_c2_g1_i1	map00480
Glutathione metabolism	246	dehydrogenase (NADP+)	ec:1.1.1.42	3	TRINITY_DN54141_c0_g1_i1, TRINITY_DN54398_c6_g1_i1, TRINITY_DN44433_c2_g1_i1	map00480
Glutathione metabolism	246	glutamyl transpeptidase	ec:2.3.2.2	2	TRINITY_DN59740_c0_g1_i1, TRINITY_DN58310_c1_g1_i1	map00480
Glutathione metabolism	246	dehydrogenase (NADP+)	ec:1.1.1.49	6	TRINITY_DN61839_c4_g1_i1, TRINITY_DN49530_c8_g1_i1, TRINITY_DN51476_c7_g1_i1, TRINITY_DN49774_c0_g1_i1, TRINITY_DN54306_c3_g1_i1, TRINITY_DN52501_c1_g1_i1	map00480
Glutathione metabolism	246	thioredoxin peroxidase	ec:1.11.1.15	1	TRINITY_DN44360_c0_g1_i1	map00480
Aminoacyl-tRNA biosynthesis	88	formyltransferase	ec:2.1.2.9	1	TRINITY_DN55303_c4_g1_i1	map00970
Aminoacyl-tRNA biosynthesis	88	ligase	ec:6.1.1.6	2	TRINITY_DN62047_c3_g1_i1, TRINITY_DN60255_c1_g1_i1	map00970
Aminoacyl-tRNA biosynthesis	88	ligase	ec:6.1.1.9	14	TRINITY_DN64221_c4_g1_i1, TRINITY_DN46027_c3_g2_i1, TRINITY_DN64049_c5_g1_i1, TRINITY_DN60649_c3_g1_i1, TRINITY_DN42558_c0_g1_i1, TRINITY_DN64221_c3_g1_i1, TRINITY_DN64221_c0_g3_i1, TRINITY_DN50918_c0_g1_i1, TRINITY_DN64221_c0_g1_i1, TRINITY_DN52547_c1_g1_i1, TRINITY_DN64221_c0_g2_i1, TRINITY_DN64221_c2_g2_i1, TRINITY_DN64221_c2_g1_i1, TRINITY_DN62810_c0_g1_i1	map00970
Aminoacyl-tRNA biosynthesis	88	ligase	ec:6.1.1.2	1	TRINITY_DN50221_c1_g1_i1	map00970
Aminoacyl-tRNA biosynthesis	88	ligase	ec:6.1.1.3	2	TRINITY_DN58961_c2_g1_i1, TRINITY_DN51804_c1_g1_i1	map00970
Aminoacyl-tRNA biosynthesis	88	ligase	ec:6.1.1.4	3	TRINITY_DN64033_c3_g1_i1, TRINITY_DN65011_c1_g1_i1, TRINITY_DN46393_c0_g1_i1	map00970
Aminoacyl-tRNA biosynthesis	88	ligase	ec:6.1.1.5	2	TRINITY_DN57250_c1_g1_i1, TRINITY_DN60809_c2_g1_i1	map00970
Aminoacyl-tRNA biosynthesis	88	ligase	ec:6.1.1.1	7	TRINITY_DN46027_c3_g2_i1, TRINITY_DN50918_c0_g1_i1, TRINITY_DN64049_c5_g1_i1, TRINITY_DN60649_c3_g1_i1, TRINITY_DN42558_c0_g1_i1, TRINITY_DN58560_c7_g1_i1, TRINITY_DN59029_c0_g1_i1	map00970
Aminoacyl-tRNA biosynthesis	88	synthase (glutamine-hydrolysing)	ec:6.3.5.7	3	TRINITY_DN60006_c1_g2_i1, TRINITY_DN60006_c1_g1_i1, TRINITY_DN50995_c0_g1_i1	map00970
Aminoacyl-tRNA biosynthesis	88	ligase	ec:6.1.1.18	13	TRINITY_DN47779_c1_g3_i1, TRINITY_DN47779_c1_g4_i1, TRINITY_DN64131_c1_g1_i1, TRINITY_DN47779_c1_g2_i1, TRINITY_DN57325_c4_g1_i1, TRINITY_DN64131_c1_g4_i1, TRINITY_DN64131_c1_g2_i1, TRINITY_DN64131_c1_g3_i1, TRINITY_DN54936_c1_g1_i1, TRINITY_DN54936_c0_g1_i1, TRINITY_DN64131_c2_g1_i1, TRINITY_DN64131_c3_g1_i1, TRINITY_DN64131_c3_g2_i1	map00970
Aminoacyl-tRNA biosynthesis	88	ligase	ec:6.1.1.17	14	TRINITY_DN47779_c1_g3_i1, TRINITY_DN47779_c1_g4_i1, TRINITY_DN64131_c1_g1_i1, TRINITY_DN47779_c1_g2_i1, TRINITY_DN54669_c2_g1_i1, TRINITY_DN52954_c3_g1_i1, TRINITY_DN64131_c1_g4_i1, TRINITY_DN48065_c2_g1_i1, TRINITY_DN64131_c1_g2_i1, TRINITY_DN64131_c1_g3_i1, TRINITY_DN52954_c3_g2_i1, TRINITY_DN64131_c2_g1_i1, TRINITY_DN64131_c3_g1_i1, TRINITY_DN64131_c3_g2_i1	map00970
Aminoacyl-tRNA biosynthesis	88	ligase	ec:6.1.1.14	3	TRINITY_DN58367_c2_g1_i1, TRINITY_DN64524_c1_g1_i1, TRINITY_DN56313_c4_g1_i1	map00970
Aminoacyl-tRNA biosynthesis	88	ligase	ec:6.1.1.16	7	TRINITY_DN53760_c4_g1_i1, TRINITY_DN53760_c3_g2_i1, TRINITY_DN59055_c1_g1_i1, TRINITY_DN59055_c1_g2_i1, TRINITY_DN53760_c5_g2_i1, TRINITY_DN53760_c2_g1_i1, TRINITY_DN53760_c3_g1_i1	map00970
Aminoacyl-tRNA biosynthesis	88	ligase	ec:6.1.1.15	3	TRINITY_DN51964_c1_g1_i1, TRINITY_DN49590_c1_g1_i1, TRINITY_DN53749_c1_g1_i1	map00970
Aminoacyl-tRNA biosynthesis	88	ligase	ec:6.1.1.10	5	TRINITY_DN53166_c4_g2_i1, TRINITY_DN53166_c2_g1_i1, TRINITY_DN53166_c3_g1_i1, TRINITY_DN42971_c4_g1_i1, TRINITY_DN58124_c4_g1_i1	map00970
Aminoacyl-tRNA biosynthesis	88	ligase	ec:6.1.1.11	3	TRINITY_DN68684_c0_g1_i1, TRINITY_DN63750_c1_g1_i1, TRINITY_DN50509_c8_g1_i1	map00970
Aminoacyl-tRNA biosynthesis	88	ligase	ec:6.1.1.21	4	TRINITY_DN59710_c1_g1_i1, TRINITY_DN61796_c4_g1_i1, TRINITY_DN66894_c0_g1_i1, TRINITY_DN66894_c0_g2_i1	map00970
Aminoacyl-tRNA biosynthesis	88	ligase	ec:6.1.1.20	16	TRINITY_DN63541_c4_g1_i1, TRINITY_DN38963_c1_g1_i1, TRINITY_DN50125_c6_g1_i1, TRINITY_DN38963_c6_g1_i1, TRINITY_DN38963_c5_g1_i1, TRINITY_DN38963_c1_g2_i1, TRINITY_DN65553_c2_g1_i1, TRINITY_DN38963_c3_g1_i1, TRINITY_DN65553_c2_g2_i1, TRINITY_DN65553_c2_g3_i1, TRINITY_DN38963_c4_g1_i1, TRINITY_DN54815_c2_g1_i1, TRINITY_DN38963_c2_g1_i1, TRINITY_DN48135_c0_g4_i1, TRINITY_DN65553_c2_g4_i1, TRINITY_D…	map00970
Tryptophan metabolism	29	N-acetyltransferase	ec:2.3.1.87	2	TRINITY_DN50675_c3_g1_i1, TRINITY_DN50675_c3_g2_i1	map00380
Tryptophan metabolism	29	equilase	ec:1.11.1.6	4	TRINITY_DN69219_c0_g1_i1, TRINITY_DN61666_c1_g1_i1, TRINITY_DN51271_c0_g1_i1, TRINITY_DN49272_c1_g1_i1	map00380
Tryptophan metabolism	29	hydratase	ec:4.2.1.17	1	TRINITY_DN50255_c0_g1_i1	map00380
Tryptophan metabolism	29	dehydrogenase (NAD+)	ec:1.2.1.3	4	TRINITY_DN57151_c1_g1_i1, TRINITY_DN58156_c3_g1_i1, TRINITY_DN52174_c4_g1_i1, TRINITY_DN50807_c0_g1_i1	map00380
Tryptophan metabolism	29	dehydrogenase	ec:1.1.1.35	3	TRINITY_DN61363_c1_g1_i1, TRINITY_DN50255_c0_g1_i1, TRINITY_DN56052_c5_g1_i1	map00380
Tryptophan metabolism	29	oxidase	ec:1.2.3.1	11	TRINITY_DN44040_c2_g1_i1, TRINITY_DN65607_c2_g4_i1, TRINITY_DN43565_c1_g1_i1, TRINITY_DN9832_c0_g1_i1, TRINITY_DN44040_c1_g1_i1, TRINITY_DN7612_c0_g1_i1, TRINITY_DN44040_c0_g2_i1, TRINITY_DN65607_c2_g1_i1, TRINITY_DN65607_c2_g2_i1, TRINITY_DN65607_c2_g3_i1, TRINITY_DN44040_c0_g1_i1	map00380
Tryptophan metabolism	29	oxidase	ec:1.2.3.7	11	TRINITY_DN44040_c2_g1_i1, TRINITY_DN65607_c2_g4_i1, TRINITY_DN43565_c1_g1_i1, TRINITY_DN9832_c0_g1_i1, TRINITY_DN44040_c1_g1_i1, TRINITY_DN7612_c0_g1_i1, TRINITY_DN44040_c0_g2_i1, TRINITY_DN65607_c2_g1_i1, TRINITY_DN65607_c2_g2_i1, TRINITY_DN65607_c2_g3_i1, TRINITY_DN44040_c0_g1_i1	map00380
Tryptophan metabolism	29	kynurenine formamidase	ec:3.5.1.9	5	TRINITY_DN58462_c6_g2_i1, TRINITY_DN58462_c6_g1_i1, TRINITY_DN58462_c6_g5_i1, TRINITY_DN51529_c2_g1_i1, TRINITY_DN43733_c2_g2_i1	map00380
Arginine biosynthesis	16	ligase	ec:6.3.1.2	6	TRINITY_DN48609_c4_g1_i1, TRINITY_DN48609_c4_g2_i1, TRINITY_DN45063_c0_g1_i1, TRINITY_DN46842_c4_g1_i1, TRINITY_DN61965_c4_g1_i1, TRINITY_DN48609_c3_g1_i1	map00220
Arginine biosynthesis	16	reductase	ec:1.2.1.38	1	TRINITY_DN56554_c0_g1_i1	map00220
Arginine biosynthesis	16	carbamoyltransferase	ec:2.1.3.3	1	TRINITY_DN50827_c1_g1_i1	map00220
Arginine biosynthesis	16	N-acetyltransferase	ec:2.3.1.1	3	TRINITY_DN61169_c5_g1_i1, TRINITY_DN61169_c3_g1_i1, TRINITY_DN47437_c5_g1_i1	map00220
Arginine biosynthesis	16	dehydrogenase [NAD(P)+]	ec:1.4.1.3	2	TRINITY_DN57263_c4_g1_i1, TRINITY_DN56394_c2_g1_i1	map00220
Arginine biosynthesis	16	dehydrogenase	ec:1.4.1.2	1	TRINITY_DN57263_c4_g1_i1	map00220
Arginine biosynthesis	16	glutaminase I	ec:3.5.1.2	2	TRINITY_DN49682_c1_g1_i1, TRINITY_DN54228_c3_g1_i1	map00220
Arginine biosynthesis	16	ec:3.5.1.5 urease	ec:3.5.1.5	1	TRINITY_DN63949_c4_g1_i1	map00220
Carbon fixation in photosynthetic organisms	78	aldolase	ec:4.1.2.13	12	TRINITY_DN42189_c0_g1_i1, TRINITY_DN59861_c4_g2_i1, TRINITY_DN57691_c1_g1_i1, TRINITY_DN57691_c0_g1_i1, TRINITY_DN43211_c0_g1_i1, TRINITY_DN54088_c1_g1_i1, TRINITY_DN37185_c0_g2_i1, TRINITY_DN47696_c0_g1_i1, TRINITY_DN37185_c0_g3_i1, TRINITY_DN57691_c2_g1_i1, TRINITY_DN37185_c0_g1_i1, TRINITY_DN57691_c0_g2_i1	map00710
Carbon fixation in photosynthetic organisms	78	carboxykinase (ATP)	ec:4.1.1.49	1	TRINITY_DN52281_c2_g1_i1	map00710
Carbon fixation in photosynthetic organisms	78	carboxylase	ec:4.1.1.39	5	TRINITY_DN62914_c5_g1_i1, TRINITY_DN69632_c0_g1_i1, TRINITY_DN54604_c2_g1_i1, TRINITY_DN47668_c0_g2_i1, TRINITY_DN44083_c0_g1_i1	map00710
Carbon fixation in photosynthetic organisms	78	carboxylase	ec:4.1.1.31	9	TRINITY_DN54642_c4_g1_i1, TRINITY_DN47061_c1_g1_i1, TRINITY_DN42266_c0_g1_i1, TRINITY_DN53498_c0_g1_i1, TRINITY_DN50194_c4_g2_i1, TRINITY_DN55579_c2_g1_i1, TRINITY_DN49378_c0_g1_i1, TRINITY_DN53769_c0_g1_i1, TRINITY_DN53769_c0_g2_i1	map00710
Carbon fixation in photosynthetic organisms	78	SBPase	ec:3.1.3.37	3	TRINITY_DN50048_c4_g1_i1, TRINITY_DN54097_c2_g1_i1, TRINITY_DN57599_c2_g1_i1	map00710
Carbon fixation in photosynthetic organisms	78	glycolaldehydetransferase	ec:2.2.1.1	4	TRINITY_DN62639_c0_g2_i1, TRINITY_DN49657_c0_g1_i1, TRINITY_DN37124_c1_g1_i1, TRINITY_DN62639_c0_g1_i1	map00710
Carbon fixation in photosynthetic organisms	78	kinase	ec:2.7.2.3	14	TRINITY_DN54202_c3_g1_i1, TRINITY_DN54202_c3_g2_i1, TRINITY_DN64810_c5_g1_i1, TRINITY_DN59699_c8_g1_i1, TRINITY_DN54788_c0_g1_i1, TRINITY_DN38318_c0_g5_i1, TRINITY_DN38318_c0_g6_i1, TRINITY_DN54202_c4_g1_i1, TRINITY_DN38318_c0_g1_i1, TRINITY_DN38318_c0_g2_i1, TRINITY_DN50862_c0_g1_i1, TRINITY_DN38318_c0_g4_i1, TRINITY_DN38318_c0_g3_i1, TRINITY_DN65010_c4_g1_i1	map00710
Carbon fixation in photosynthetic organisms	78	dehydrogenase (NAD(P)+) (phosphorylating)	ec:1.2.1.59	2	TRINITY_DN62729_c4_g1_i1, TRINITY_DN62729_c5_g1_i1	map00710
Carbon fixation in photosynthetic organisms	78	3-epimerase	ec:5.1.3.1	2	TRINITY_DN46612_c0_g1_i1, TRINITY_DN49448_c0_g1_i1	map00710
Carbon fixation in photosynthetic organisms	78	hexose diphosphatase	ec:3.1.3.11	5	TRINITY_DN50661_c0_g1_i1, TRINITY_DN54223_c6_g2_i1, TRINITY_DN49443_c6_g1_i1, TRINITY_DN62612_c2_g1_i1, TRINITY_DN46850_c0_g1_i1	map00710
Carbon fixation in photosynthetic organisms	78	dehydrogenase (phosphorylating)	ec:1.2.1.12	2	TRINITY_DN62729_c4_g1_i1, TRINITY_DN62729_c5_g1_i1	map00710
Carbon fixation in photosynthetic organisms	78	isomerase	ec:5.3.1.1	3	TRINITY_DN50032_c3_g1_i1, TRINITY_DN49393_c0_g1_i1, TRINITY_DN44464_c0_g1_i1	map00710
Carbon fixation in photosynthetic organisms	78	isomerase	ec:5.3.1.6	3	TRINITY_DN43229_c0_g1_i1, TRINITY_DN52699_c1_g1_i1, TRINITY_DN52699_c1_g2_i1	map00710
Carbon fixation in photosynthetic organisms	78	phosphate dikinase	ec:2.7.9.1	2	TRINITY_DN51242_c0_g1_i1, TRINITY_DN52015_c7_g1_i1	map00710
Carbon fixation in photosynthetic organisms	78	dehydrogenase (NADP+)	ec:1.1.1.82	1	TRINITY_DN51464_c0_g1_i1	map00710
Carbon fixation in photosynthetic organisms	78	dehydrogenase	ec:1.1.1.37	11	TRINITY_DN57405_c1_g1_i1, TRINITY_DN57923_c4_g1_i1, TRINITY_DN57405_c1_g2_i1, TRINITY_DN63686_c6_g1_i1, TRINITY_DN47042_c0_g1_i1, TRINITY_DN57405_c1_g3_i1, TRINITY_DN41712_c0_g1_i1, TRINITY_DN50197_c3_g3_i1, TRINITY_DN45225_c0_g1_i1, TRINITY_DN57405_c0_g1_i1, TRINITY_DN57923_c3_g1_i1	map00710
Carbon fixation in photosynthetic organisms	78	dehydrogenase (decarboxylating)	ec:1.1.1.39	1	TRINITY_DN65314_c3_g1_i1	map00710
Geraniol degradation	3	hydratase	ec:4.2.1.17	1	TRINITY_DN50255_c0_g1_i1	map00281
Geraniol degradation	3	dehydrogenase	ec:1.1.1.35	3	TRINITY_DN61363_c1_g1_i1, TRINITY_DN50255_c0_g1_i1, TRINITY_DN56052_c5_g1_i1	map00281
Valine, leucine and isoleucine degradation	29	synthase	ec:2.3.3.10	4	TRINITY_DN60661_c1_g1_i1, TRINITY_DN56246_c0_g1_i1, TRINITY_DN56246_c1_g2_i1, TRINITY_DN56246_c1_g1_i1	map00280
Valine, leucine and isoleucine degradation	29	carboxylase	ec:6.4.1.4	1	TRINITY_DN59519_c4_g1_i1	map00280
Valine, leucine and isoleucine degradation	29	dehydrogenase (CoA-acylating)	ec:1.2.1.27	1	TRINITY_DN58156_c3_g1_i1	map00280
Valine, leucine and isoleucine degradation	29	(2-methylpropanoyl)transferase	ec:2.3.1.168	1	TRINITY_DN52110_c3_g1_i1	map00280
Valine, leucine and isoleucine degradation	29	dehydrogenase	ec:1.8.1.4	3	TRINITY_DN52639_c1_g1_i1, TRINITY_DN54423_c0_g2_i1, TRINITY_DN62095_c1_g1_i1	map00280
Valine, leucine and isoleucine degradation	29	hydratase	ec:4.2.1.17	1	TRINITY_DN50255_c0_g1_i1	map00280
Valine, leucine and isoleucine degradation	29	dehydrogenase (NAD+)	ec:1.2.1.3	4	TRINITY_DN57151_c1_g1_i1, TRINITY_DN58156_c3_g1_i1, TRINITY_DN52174_c4_g1_i1, TRINITY_DN50807_c0_g1_i1	map00280
Valine, leucine and isoleucine degradation	29	dehydrogenase	ec:1.1.1.35	3	TRINITY_DN61363_c1_g1_i1, TRINITY_DN50255_c0_g1_i1, TRINITY_DN56052_c5_g1_i1	map00280
Valine, leucine and isoleucine degradation	29	dehydrogenase	ec:1.1.1.31	2	TRINITY_DN57938_c2_g1_i1, TRINITY_DN57938_c2_g2_i1	map00280
Valine, leucine and isoleucine degradation	29	oxidase	ec:1.2.3.1	11	TRINITY_DN44040_c2_g1_i1, TRINITY_DN65607_c2_g4_i1, TRINITY_DN43565_c1_g1_i1, TRINITY_DN9832_c0_g1_i1, TRINITY_DN44040_c1_g1_i1, TRINITY_DN7612_c0_g1_i1, TRINITY_DN44040_c0_g2_i1, TRINITY_DN65607_c2_g1_i1, TRINITY_DN65607_c2_g2_i1, TRINITY_DN65607_c2_g3_i1, TRINITY_DN44040_c0_g1_i1	map00280
Primary bile acid biosynthesis	3	dehydrogenase	ec:1.1.1.35	3	TRINITY_DN61363_c1_g1_i1, TRINITY_DN50255_c0_g1_i1, TRINITY_DN56052_c5_g1_i1	map00120
Pantothenate and CoA biosynthesis	23	hydantoinase	ec:3.5.2.2	1	TRINITY_DN60538_c10_g1_i1	map00770
Pantothenate and CoA biosynthesis	23	diphosphatase	ec:3.6.1.9	2	TRINITY_DN60369_c4_g3_i1, TRINITY_DN47658_c0_g1_i1	map00770
Pantothenate and CoA biosynthesis	23	dehydratase	ec:4.2.1.9	1	TRINITY_DN54972_c0_g1_i1	map00770
Pantothenate and CoA biosynthesis	23	ligase (AMP-forming)	ec:6.3.2.1	7	TRINITY_DN56762_c3_g7_i1, TRINITY_DN56762_c3_g4_i1, TRINITY_DN56762_c3_g3_i1, TRINITY_DN56762_c3_g5_i1, TRINITY_DN56762_c3_g6_i1, TRINITY_DN56762_c3_g1_i1, TRINITY_DN56762_c3_g2_i1	map00770
Pantothenate and CoA biosynthesis	23	kinase	ec:2.7.1.33	2	TRINITY_DN57750_c2_g1_i1, TRINITY_DN59089_c4_g1_i1	map00770
Pantothenate and CoA biosynthesis	23	kinase	ec:2.7.1.24	5	TRINITY_DN57424_c1_g1_i1, TRINITY_DN55017_c1_g2_i1, TRINITY_DN57596_c5_g1_i1, TRINITY_DN55017_c1_g1_i1, TRINITY_DN57596_c3_g1_i1	map00770
Pantothenate and CoA biosynthesis	23	adenylyltransferase	ec:2.7.7.3	1	TRINITY_DN57424_c1_g1_i1	map00770
Pantothenate and CoA biosynthesis	23	reductoisomerase (NADP+)	ec:1.1.1.86	2	TRINITY_DN58270_c3_g1_i1, TRINITY_DN57895_c0_g1_i1	map00770
Pantothenate and CoA biosynthesis	23	dehydrogenase (NADP+)	ec:1.3.1.2	2	TRINITY_DN51540_c2_g2_i1, TRINITY_DN51540_c2_g1_i1	map00770
Pantothenate and CoA biosynthesis	23	dehydrogenase (NAD+)	ec:1.3.1.1	1	TRINITY_DN56130_c2_g1_i1	map00770
Other types of O-glycan biosynthesis	21	mannosyltransferase	ec:2.4.1.109	5	TRINITY_DN55842_c3_g1_i1, TRINITY_DN62188_c6_g1_i1, TRINITY_DN55304_c2_g1_i1, TRINITY_DN44656_c0_g1_i1, TRINITY_DN53298_c1_g1_i1	map00514
Other types of O-glycan biosynthesis	21	GDP-L-fucose:polypeptide fucosyltransferase	ec:2.4.1.221	1	TRINITY_DN57787_c0_g1_i1	map00514
Other types of O-glycan biosynthesis	21	3-beta-glucuronosyltransferase	ec:2.4.1.135	15	TRINITY_DN54766_c3_g3_i1, TRINITY_DN55415_c1_g1_i1, TRINITY_DN50200_c2_g1_i1, TRINITY_DN61696_c1_g2_i1, TRINITY_DN52822_c6_g1_i1, TRINITY_DN49341_c0_g2_i1, TRINITY_DN58223_c3_g1_i1, TRINITY_DN54252_c2_g2_i1, TRINITY_DN61696_c1_g8_i1, TRINITY_DN62211_c2_g1_i1, TRINITY_DN52822_c1_g1_i1, TRINITY_DN62544_c0_g1_i1, TRINITY_DN52378_c0_g1_i1, TRINITY_DN61696_c1_g7_i1, TRINITY_DN54252_c2_g1_i1	map00514
Various types of N-glycan biosynthesis	8	3-alpha-L-fucosyltransferase	ec:2.4.1.214	2	TRINITY_DN51069_c5_g1_i1, TRINITY_DN51069_c1_g1_i1	map00513
Various types of N-glycan biosynthesis	8	1,2-alpha-mannosidase	ec:3.2.1.113	6	TRINITY_DN43344_c2_g1_i1, TRINITY_DN40797_c0_g1_i1, TRINITY_DN55869_c4_g1_i1, TRINITY_DN49067_c1_g1_i1, TRINITY_DN55869_c5_g3_i1, TRINITY_DN55919_c0_g2_i1	map00513
Sesquiterpenoid and triterpenoid biosynthesis	1	synthase	ec:2.5.1.21	1	TRINITY_DN63280_c2_g1_i1	map00909
Zeatin biosynthesis	15	O-beta-D-glucosyltransferase	ec:2.4.1.215	3	TRINITY_DN54062_c5_g1_i1, TRINITY_DN43283_c0_g1_i1, TRINITY_DN60137_c0_g1_i1	map00908
Zeatin biosynthesis	15	dimethylallyltransferase	ec:2.5.1.27	1	TRINITY_DN61907_c1_g1_i1	map00908
Zeatin biosynthesis	15	dimethylallyltransferase	ec:2.5.1.75	4	TRINITY_DN55898_c3_g1_i1, TRINITY_DN55898_c0_g1_i1, TRINITY_DN55898_c1_g1_i1, TRINITY_DN61907_c1_g1_i1	map00908
Zeatin biosynthesis	15	dehydrogenase	ec:1.5.99.12	8	TRINITY_DN58031_c3_g1_i1, TRINITY_DN6959_c0_g1_i1, TRINITY_DN63479_c1_g1_i1, TRINITY_DN52821_c3_g1_i1, TRINITY_DN42458_c0_g1_i1, TRINITY_DN48468_c0_g1_i1, TRINITY_DN59081_c0_g4_i1, TRINITY_DN55126_c1_g1_i1	map00908
Other glycan degradation	37	psychosine hydrolase	ec:3.2.1.45	7	TRINITY_DN64122_c2_g2_i1, TRINITY_DN64122_c2_g1_i1, TRINITY_DN57135_c1_g1_i1, TRINITY_DN58328_c5_g1_i1, TRINITY_DN63351_c5_g1_i1, TRINITY_DN59042_c2_g4_i1, TRINITY_DN59042_c2_g1_i1	map00511
Other glycan degradation	37	alpha-fucosidase	ec:3.2.1.51	1	TRINITY_DN54591_c3_g1_i1	map00511
Other glycan degradation	37	aspartylglucosylamine deaspartylase	ec:3.5.1.26	1	TRINITY_DN58774_c3_g1_i1	map00511
Other glycan degradation	37	endo-beta-N-acetylglucosaminidase	ec:3.2.1.96	1	TRINITY_DN63753_c1_g1_i1	map00511
Other glycan degradation	37	alpha-D-mannosidase	ec:3.2.1.24	18	TRINITY_DN58025_c1_g1_i1, TRINITY_DN58025_c7_g1_i1, TRINITY_DN40797_c0_g1_i1, TRINITY_DN58025_c0_g2_i1, TRINITY_DN57223_c0_g1_i1, TRINITY_DN58025_c0_g1_i1, TRINITY_DN58025_c5_g1_i1, TRINITY_DN57223_c8_g1_i1, TRINITY_DN55919_c0_g2_i1, TRINITY_DN43344_c2_g1_i1, TRINITY_DN57223_c2_g1_i1, TRINITY_DN57223_c0_g2_i1, TRINITY_DN55869_c4_g1_i1, TRINITY_DN58025_c4_g1_i1, TRINITY_DN57223_c6_g1_i1, TRINITY_D…	map00511
Other glycan degradation	37	mannanase	ec:3.2.1.25	9	TRINITY_DN57059_c4_g1_i1, TRINITY_DN68172_c0_g1_i1, TRINITY_DN57334_c1_g1_i1, TRINITY_DN58129_c2_g2_i1, TRINITY_DN56192_c1_g2_i1, TRINITY_DN56192_c1_g3_i1, TRINITY_DN56192_c1_g1_i1, TRINITY_DN52121_c0_g1_i1, TRINITY_DN52898_c1_g1_i1	map00511
Citrate cycle (TCA cycle)	47	succinyltransferase	ec:2.3.1.61	2	TRINITY_DN62389_c4_g1_i1, TRINITY_DN62389_c4_g2_i1	map00020
Citrate cycle (TCA cycle)	47	carboxykinase (ATP)	ec:4.1.1.49	1	TRINITY_DN52281_c2_g1_i1	map00020
Citrate cycle (TCA cycle)	47	dehydrogenase	ec:1.3.5.1	9	TRINITY_DN56479_c0_g3_i1, TRINITY_DN56479_c0_g4_i1, TRINITY_DN56479_c0_g2_i1, TRINITY_DN56479_c0_g1_i1, TRINITY_DN9593_c0_g1_i1, TRINITY_DN56479_c0_g6_i1, TRINITY_DN60143_c0_g1_i1, TRINITY_DN56479_c0_g5_i1, TRINITY_DN52451_c6_g1_i1	map00020
Citrate cycle (TCA cycle)	47	hydratase	ec:4.2.1.2	1	TRINITY_DN55398_c0_g1_i1	map00020
Citrate cycle (TCA cycle)	47	ligase (ADP-forming)	ec:6.2.1.5	2	TRINITY_DN54712_c10_g1_i1, TRINITY_DN46133_c0_g1_i1	map00020
Citrate cycle (TCA cycle)	47	ligase (GDP-forming)	ec:6.2.1.4	2	TRINITY_DN54712_c10_g1_i1, TRINITY_DN46133_c0_g1_i1	map00020
Citrate cycle (TCA cycle)	47	acetyltransferase	ec:2.3.1.12	2	TRINITY_DN53098_c4_g1_i1, TRINITY_DN51962_c0_g1_i1	map00020
Citrate cycle (TCA cycle)	47	dehydrogenase	ec:1.8.1.4	3	TRINITY_DN52639_c1_g1_i1, TRINITY_DN54423_c0_g2_i1, TRINITY_DN62095_c1_g1_i1	map00020
Citrate cycle (TCA cycle)	47	dehydrogenase	ec:1.1.1.37	11	TRINITY_DN57405_c1_g1_i1, TRINITY_DN57923_c4_g1_i1, TRINITY_DN57405_c1_g2_i1, TRINITY_DN63686_c6_g1_i1, TRINITY_DN47042_c0_g1_i1, TRINITY_DN57405_c1_g3_i1, TRINITY_DN41712_c0_g1_i1, TRINITY_DN50197_c3_g3_i1, TRINITY_DN45225_c0_g1_i1, TRINITY_DN57405_c0_g1_i1, TRINITY_DN57923_c3_g1_i1	map00020
Citrate cycle (TCA cycle)	47	dehydrogenase (NADP+)	ec:1.1.1.42	3	TRINITY_DN54141_c0_g1_i1, TRINITY_DN54398_c6_g1_i1, TRINITY_DN44433_c2_g1_i1	map00020
Citrate cycle (TCA cycle)	47	dehydrogenase (NAD+)	ec:1.1.1.41	4	TRINITY_DN37280_c0_g1_i1, TRINITY_DN53267_c3_g1_i1, TRINITY_DN53267_c5_g2_i1, TRINITY_DN51626_c3_g1_i1	map00020
Citrate cycle (TCA cycle)	47	(Si)-synthase	ec:2.3.3.1	3	TRINITY_DN42882_c0_g1_i1, TRINITY_DN50789_c4_g2_i1, TRINITY_DN50789_c4_g1_i1	map00020
Citrate cycle (TCA cycle)	47	dehydrogenase (acetyl-transferring)	ec:1.2.4.1	6	TRINITY_DN49780_c0_g1_i1, TRINITY_DN50872_c1_g1_i1, TRINITY_DN51176_c0_g1_i1, TRINITY_DN49780_c5_g1_i1, TRINITY_DN50879_c0_g1_i1, TRINITY_DN49780_c7_g1_i1	map00020
One carbon pool by folate	9	formyltransferase	ec:2.1.2.2	1	TRINITY_DN50459_c0_g1_i1	map00670
One carbon pool by folate	9	hydroxymethyltransferase	ec:2.1.2.1	3	TRINITY_DN56893_c0_g1_i1, TRINITY_DN46831_c1_g1_i1, TRINITY_DN45979_c0_g1_i1	map00670
One carbon pool by folate	9	formyltransferase	ec:2.1.2.9	1	TRINITY_DN55303_c4_g1_i1	map00670
One carbon pool by folate	9	ligase	ec:6.3.4.3	1	TRINITY_DN65759_c8_g1_i1	map00670
One carbon pool by folate	9	reductase [NAD(P)H]	ec:1.5.1.20	2	TRINITY_DN57476_c1_g1_i1, TRINITY_DN61724_c4_g4_i1	map00670
One carbon pool by folate	9	cyclohydrolase	ec:3.5.4.9	1	TRINITY_DN65759_c8_g1_i1	map00670
One carbon pool by folate	9	deformylase	ec:3.5.1.10	1	TRINITY_DN57139_c4_g3_i1	map00670
One carbon pool by folate	9	dehydrogenase (NADP+)	ec:1.5.1.5	1	TRINITY_DN65759_c8_g1_i1	map00670
N-Glycan biosynthesis	14	dolichol diphosphatase	ec:3.6.1.43	1	TRINITY_DN45177_c3_g1_i1	map00510
N-Glycan biosynthesis	14	1,2-alpha-mannosidase	ec:3.2.1.113	6	TRINITY_DN43344_c2_g1_i1, TRINITY_DN40797_c0_g1_i1, TRINITY_DN55869_c4_g1_i1, TRINITY_DN49067_c1_g1_i1, TRINITY_DN55869_c5_g3_i1, TRINITY_DN55919_c0_g2_i1	map00510
N-Glycan biosynthesis	14	beta-D-mannosyltransferase	ec:2.4.1.83	4	TRINITY_DN50212_c4_g1_i1, TRINITY_DN55304_c2_g1_i1, TRINITY_DN59980_c5_g3_i1, TRINITY_DN53298_c1_g1_i1	map00510
N-Glycan biosynthesis	14	glucosidase	ec:3.2.1.106	3	TRINITY_DN54354_c1_g3_i1, TRINITY_DN54354_c1_g1_i1, TRINITY_DN54354_c1_g2_i1	map00510
Carotenoid biosynthesis	8	desaturase	ec:1.3.5.6	1	TRINITY_DN54745_c0_g1_i1	map00906
Carotenoid biosynthesis	8	dioxygenase	ec:1.13.11.51	1	TRINITY_DN62479_c3_g1_i1	map00906
Carotenoid biosynthesis	8	dehydrogenase	ec:1.1.1.288	1	TRINITY_DN47826_c0_g1_i1	map00906
Carotenoid biosynthesis	8	epoxidase	ec:1.14.13.90	5	TRINITY_DN44500_c0_g1_i1, TRINITY_DN61250_c3_g1_i1, TRINITY_DN61250_c3_g3_i1, TRINITY_DN61250_c5_g1_i1, TRINITY_DN61250_c3_g2_i1	map00906
Diterpenoid biosynthesis	13	3beta-dioxygenase	ec:1.14.11.15	4	TRINITY_DN47599_c1_g2_i1, TRINITY_DN47599_c1_g1_i1, TRINITY_DN47599_c1_g3_i1, TRINITY_DN51284_c0_g1_i1	map00904
Diterpenoid biosynthesis	13	2beta-dioxygenase	ec:1.14.11.13	8	TRINITY_DN63136_c3_g2_i1, TRINITY_DN39062_c0_g2_i1, TRINITY_DN39062_c0_g1_i1, TRINITY_DN54349_c0_g1_i1, TRINITY_DN63136_c3_g1_i1, TRINITY_DN57479_c2_g2_i1, TRINITY_DN46546_c1_g1_i1, TRINITY_DN57479_c1_g1_i1	map00904
Diterpenoid biosynthesis	13	oxidase	ec:1.14.13.78	1	TRINITY_DN50512_c1_g1_i1	map00904
Limonene and pinene degradation	5	hydratase	ec:4.2.1.17	1	TRINITY_DN50255_c0_g1_i1	map00903
Limonene and pinene degradation	5	dehydrogenase (NAD+)	ec:1.2.1.3	4	TRINITY_DN57151_c1_g1_i1, TRINITY_DN58156_c3_g1_i1, TRINITY_DN52174_c4_g1_i1, TRINITY_DN50807_c0_g1_i1	map00903
Indole alkaloid biosynthesis	3	synthase	ec:4.3.3.2	3	TRINITY_DN40339_c0_g1_i1, TRINITY_DN40339_c1_g2_i1, TRINITY_DN40339_c1_g1_i1	map00901
beta-Alanine metabolism	46	hydantoinase	ec:3.5.2.2	1	TRINITY_DN60538_c10_g1_i1	map00410
beta-Alanine metabolism	46	ligase (AMP-forming)	ec:6.3.2.1	7	TRINITY_DN56762_c3_g7_i1, TRINITY_DN56762_c3_g4_i1, TRINITY_DN56762_c3_g3_i1, TRINITY_DN56762_c3_g5_i1, TRINITY_DN56762_c3_g6_i1, TRINITY_DN56762_c3_g1_i1, TRINITY_DN56762_c3_g2_i1	map00410
beta-Alanine metabolism	46	decarboxylase	ec:4.1.1.9	1	TRINITY_DN57212_c0_g2_i1	map00410
beta-Alanine metabolism	46	synthase	ec:2.5.1.16	3	TRINITY_DN51616_c5_g1_i1, TRINITY_DN57639_c1_g1_i1, TRINITY_DN51751_c5_g1_i1	map00410
beta-Alanine metabolism	46	oxidase (propane-1,3-diamine-forming)	ec:1.5.3.14	2	TRINITY_DN47418_c1_g1_i1, TRINITY_DN54301_c7_g1_i1	map00410
beta-Alanine metabolism	46	synthase	ec:2.5.1.22	1	TRINITY_DN46136_c0_g1_i1	map00410
beta-Alanine metabolism	46	dehydrogenase (acetylating)	ec:1.2.1.18	1	TRINITY_DN58156_c3_g1_i1	map00410
beta-Alanine metabolism	46	decarboxylase	ec:4.1.1.15	6	TRINITY_DN46881_c1_g1_i1, TRINITY_DN53632_c0_g1_i1, TRINITY_DN53632_c0_g2_i1, TRINITY_DN46881_c0_g1_i1, TRINITY_DN53632_c1_g1_i1, TRINITY_DN53632_c1_g2_i1	map00410
beta-Alanine metabolism	46	hydratase	ec:4.2.1.17	1	TRINITY_DN50255_c0_g1_i1	map00410
beta-Alanine metabolism	46	dehydrogenase [NAD(P)+]	ec:1.2.1.5	2	TRINITY_DN57151_c1_g1_i1, TRINITY_DN52174_c4_g1_i1	map00410
beta-Alanine metabolism	46	dehydrogenase (NAD+)	ec:1.2.1.3	4	TRINITY_DN57151_c1_g1_i1, TRINITY_DN58156_c3_g1_i1, TRINITY_DN52174_c4_g1_i1, TRINITY_DN50807_c0_g1_i1	map00410
beta-Alanine metabolism	46	dehydrogenase (NADP+)	ec:1.3.1.2	2	TRINITY_DN51540_c2_g2_i1, TRINITY_DN51540_c2_g1_i1	map00410
beta-Alanine metabolism	46	dehydrogenase (NAD+)	ec:1.3.1.1	1	TRINITY_DN56130_c2_g1_i1	map00410
beta-Alanine metabolism	46	oxidase	ec:1.4.3.21	17	TRINITY_DN63307_c2_g1_i1, TRINITY_DN63307_c6_g4_i1, TRINITY_DN63307_c1_g1_i1, TRINITY_DN63307_c6_g6_i1, TRINITY_DN63307_c6_g3_i1, TRINITY_DN58046_c2_g1_i1, TRINITY_DN58046_c2_g2_i1, TRINITY_DN63307_c6_g5_i1, TRINITY_DN63307_c5_g1_i1, TRINITY_DN53859_c4_g2_i1, TRINITY_DN51803_c2_g1_i1, TRINITY_DN53859_c4_g1_i1, TRINITY_DN63307_c6_g2_i1, TRINITY_DN63307_c6_g1_i1, TRINITY_DN55298_c0_g1_i1, TRINITY_D…	map00410
Glucosinolate biosynthesis	1	N-monooxygenase	ec:1.14.13.41	1	TRINITY_DN61573_c0_g1_i1	map00966
Terpenoid backbone biosynthesis	25	synthase	ec:2.3.3.10	4	TRINITY_DN60661_c1_g1_i1, TRINITY_DN56246_c0_g1_i1, TRINITY_DN56246_c1_g2_i1, TRINITY_DN56246_c1_g1_i1	map00900
Terpenoid backbone biosynthesis	25	decarboxylase	ec:4.1.1.33	1	TRINITY_DN48247_c0_g1_i1	map00900
Terpenoid backbone biosynthesis	25	synthase	ec:2.2.1.7	3	TRINITY_DN64788_c4_g1_i1, TRINITY_DN61518_c5_g1_i1, TRINITY_DN60585_c5_g1_i1	map00900
Terpenoid backbone biosynthesis	25	kinase	ec:2.7.1.36	2	TRINITY_DN61424_c0_g2_i1, TRINITY_DN61424_c0_g1_i1	map00900
Terpenoid backbone biosynthesis	25	diphosphate synthase	ec:2.5.1.10	3	TRINITY_DN67902_c0_g1_i1, TRINITY_DN52158_c2_g1_i1, TRINITY_DN52158_c5_g1_i1	map00900
Terpenoid backbone biosynthesis	25	diphosphate synthase	ec:2.5.1.29	5	TRINITY_DN63280_c2_g1_i1, TRINITY_DN57620_c1_g1_i1, TRINITY_DN61126_c3_g1_i1, TRINITY_DN61126_c0_g2_i1, TRINITY_DN61126_c0_g1_i1	map00900
Terpenoid backbone biosynthesis	25	oxidase	ec:1.8.3.5	1	TRINITY_DN55328_c3_g1_i1	map00900
Terpenoid backbone biosynthesis	25	geranyl-diphosphate synthase	ec:2.5.1.1	3	TRINITY_DN67902_c0_g1_i1, TRINITY_DN52158_c2_g1_i1, TRINITY_DN52158_c5_g1_i1	map00900
Terpenoid backbone biosynthesis	25	O-methyltransferase	ec:2.1.1.100	1	TRINITY_DN61121_c3_g4_i1	map00900
Terpenoid backbone biosynthesis	25	Delta-isomerase	ec:5.3.3.2	2	TRINITY_DN60177_c7_g1_i1, TRINITY_DN46533_c0_g1_i1	map00900
Terpenoid backbone biosynthesis	25	farnesyltransferase	ec:2.5.1.58	2	TRINITY_DN47797_c0_g1_i1, TRINITY_DN58397_c1_g1_i1	map00900
Terpenoid backbone biosynthesis	25	reductase (NADPH)	ec:1.1.1.34	1	TRINITY_DN52086_c2_g1_i1	map00900
D-Alanine metabolism	1	ligase	ec:6.3.2.4	1	TRINITY_DN63725_c3_g5_i1	map00473
D-Arginine and D-ornithine metabolism	3	racemase	ec:5.1.1.10	3	TRINITY_DN54661_c2_g1_i1, TRINITY_DN53544_c4_g1_i1, TRINITY_DN59581_c3_g1_i1	map00472
D-Glutamine and D-glutamate metabolism	7	racemase	ec:5.1.1.10	3	TRINITY_DN54661_c2_g1_i1, TRINITY_DN53544_c4_g1_i1, TRINITY_DN59581_c3_g1_i1	map00471
D-Glutamine and D-glutamate metabolism	7	dehydrogenase [NAD(P)+]	ec:1.4.1.3	2	TRINITY_DN57263_c4_g1_i1, TRINITY_DN56394_c2_g1_i1	map00471
D-Glutamine and D-glutamate metabolism	7	glutaminase I	ec:3.5.1.2	2	TRINITY_DN49682_c1_g1_i1, TRINITY_DN54228_c3_g1_i1	map00471
Lysine degradation	63	succinyltransferase	ec:2.3.1.61	2	TRINITY_DN62389_c4_g1_i1, TRINITY_DN62389_c4_g2_i1	map00310
Lysine degradation	63	N-methyltransferase	ec:2.1.1.43	54	TRINITY_DN49215_c1_g1_i1, TRINITY_DN47277_c0_g1_i1, TRINITY_DN63957_c0_g1_i1, TRINITY_DN62781_c2_g1_i1, TRINITY_DN64005_c0_g1_i1, TRINITY_DN41757_c1_g1_i1, TRINITY_DN56953_c3_g1_i1, TRINITY_DN59826_c4_g1_i1, TRINITY_DN60710_c6_g1_i1, TRINITY_DN47939_c0_g1_i1, TRINITY_DN39676_c0_g1_i1, TRINITY_DN60710_c3_g1_i1, TRINITY_DN64486_c4_g3_i1, TRINITY_DN51603_c0_g1_i1, TRINITY_DN60228_c3_g1_i1, TRINITY_D…	map00310
Lysine degradation	63	hydratase	ec:4.2.1.17	1	TRINITY_DN50255_c0_g1_i1	map00310
Lysine degradation	63	dehydrogenase (NAD+)	ec:1.2.1.3	4	TRINITY_DN57151_c1_g1_i1, TRINITY_DN58156_c3_g1_i1, TRINITY_DN52174_c4_g1_i1, TRINITY_DN50807_c0_g1_i1	map00310
Lysine degradation	63	dehydrogenase	ec:1.1.1.35	3	TRINITY_DN61363_c1_g1_i1, TRINITY_DN50255_c0_g1_i1, TRINITY_DN56052_c5_g1_i1	map00310
Tropane, piperidine and pyridine alkaloid biosynthesis	19	transaminase	ec:2.6.1.9	2	TRINITY_DN53959_c1_g1_i1, TRINITY_DN64808_c0_g1_i1	map00960
Tropane, piperidine and pyridine alkaloid biosynthesis	19	oxidase	ec:1.4.3.21	17	TRINITY_DN63307_c2_g1_i1, TRINITY_DN63307_c6_g4_i1, TRINITY_DN63307_c1_g1_i1, TRINITY_DN63307_c6_g6_i1, TRINITY_DN63307_c6_g3_i1, TRINITY_DN58046_c2_g1_i1, TRINITY_DN58046_c2_g2_i1, TRINITY_DN63307_c6_g5_i1, TRINITY_DN63307_c5_g1_i1, TRINITY_DN53859_c4_g2_i1, TRINITY_DN51803_c2_g1_i1, TRINITY_DN53859_c4_g1_i1, TRINITY_DN63307_c6_g2_i1, TRINITY_DN63307_c6_g1_i1, TRINITY_DN55298_c0_g1_i1, TRINITY_D…	map00960
Porphyrin and chlorophyll metabolism	76	decarboxylase	ec:4.1.1.37	2	TRINITY_DN53117_c0_g1_i1, TRINITY_DN46822_c0_g1_i1	map00860
Porphyrin and chlorophyll metabolism	76	oxidoreductase	ec:1.3.7.4	1	TRINITY_DN58677_c3_g1_i1	map00860
Porphyrin and chlorophyll metabolism	76	chlorophyllide a 8-vinyl-reductase	ec:1.3.1.75	1	TRINITY_DN52100_c0_g1_i1	map00860
Porphyrin and chlorophyll metabolism	76	dehydrogenase	ec:1.3.1.76	1	TRINITY_DN52106_c1_g1_i1	map00860
Porphyrin and chlorophyll metabolism	76	synthase	ec:4.2.1.75	1	TRINITY_DN57476_c1_g1_i1	map00860
Porphyrin and chlorophyll metabolism	76	ferrochelatase	ec:4.99.1.4	1	TRINITY_DN45069_c4_g1_i1	map00860
Porphyrin and chlorophyll metabolism	76	cobaltochelatase	ec:4.99.1.3	1	TRINITY_DN45069_c4_g1_i1	map00860
Porphyrin and chlorophyll metabolism	76	ferro-protoporphyrin chelatase	ec:4.99.1.1	4	TRINITY_DN45069_c4_g1_i1, TRINITY_DN62461_c9_g1_i1, TRINITY_DN62461_c6_g1_i1, TRINITY_DN53313_c2_g1_i1	map00860
Porphyrin and chlorophyll metabolism	76	CLH	ec:3.1.1.14	4	TRINITY_DN60656_c0_g2_i1, TRINITY_DN61259_c1_g3_i1, TRINITY_DN49717_c1_g1_i1, TRINITY_DN39219_c0_g1_i1	map00860
Porphyrin and chlorophyll metabolism	76	ceruloplasmin	ec:1.16.3.1	4	TRINITY_DN60485_c2_g1_i1, TRINITY_DN61976_c2_g2_i1, TRINITY_DN61976_c1_g1_i1, TRINITY_DN47569_c1_g1_i1	map00860
Porphyrin and chlorophyll metabolism	76	b reductase	ec:1.1.1.294	2	TRINITY_DN55505_c4_g1_i1, TRINITY_DN55745_c2_g2_i1	map00860
Porphyrin and chlorophyll metabolism	76	C-methyltransferase	ec:2.1.1.107	1	TRINITY_DN52106_c1_g1_i1	map00860
Porphyrin and chlorophyll metabolism	76	protoporphyrin IX methyltransferase	ec:2.1.1.11	1	TRINITY_DN56123_c3_g1_i1	map00860
Porphyrin and chlorophyll metabolism	76	reductase	ec:1.3.1.33	2	TRINITY_DN53217_c0_g1_i1, TRINITY_DN44608_c0_g1_i1	map00860
Porphyrin and chlorophyll metabolism	76	synthase	ec:4.2.1.24	2	TRINITY_DN69686_c0_g1_i1, TRINITY_DN45814_c1_g1_i1	map00860
Porphyrin and chlorophyll metabolism	76	synthase	ec:2.5.1.62	1	TRINITY_DN46904_c1_g2_i1	map00860
Porphyrin and chlorophyll metabolism	76	synthase	ec:2.5.1.61	2	TRINITY_DN43148_c1_g1_i1, TRINITY_DN41043_c0_g1_i1	map00860
Porphyrin and chlorophyll metabolism	76	oxygenase	ec:1.14.13.122	4	TRINITY_DN53589_c1_g1_i1, TRINITY_DN53913_c3_g1_i1, TRINITY_DN58859_c1_g1_i1, TRINITY_DN57730_c3_g2_i1	map00860
Porphyrin and chlorophyll metabolism	76	2,1-aminomutase	ec:5.4.3.8	1	TRINITY_DN49302_c0_g1_i1	map00860
Porphyrin and chlorophyll metabolism	76	IX monomethyl ester (oxidative) cyclase	ec:1.14.13.81	1	TRINITY_DN43556_c0_g1_i1	map00860
Porphyrin and chlorophyll metabolism	76	ligase	ec:6.1.1.17	14	TRINITY_DN47779_c1_g3_i1, TRINITY_DN47779_c1_g4_i1, TRINITY_DN64131_c1_g1_i1, TRINITY_DN47779_c1_g2_i1, TRINITY_DN54669_c2_g1_i1, TRINITY_DN52954_c3_g1_i1, TRINITY_DN64131_c1_g4_i1, TRINITY_DN48065_c2_g1_i1, TRINITY_DN64131_c1_g2_i1, TRINITY_DN64131_c1_g3_i1, TRINITY_DN52954_c3_g2_i1, TRINITY_DN64131_c2_g1_i1, TRINITY_DN64131_c3_g1_i1, TRINITY_DN64131_c3_g2_i1	map00860
Porphyrin and chlorophyll metabolism	76	1-naphthol glucuronyltransferase	ec:2.4.1.17	17	TRINITY_DN54766_c3_g3_i1, TRINITY_DN55415_c1_g1_i1, TRINITY_DN51499_c1_g1_i1, TRINITY_DN50200_c2_g1_i1, TRINITY_DN61696_c1_g2_i1, TRINITY_DN52822_c6_g1_i1, TRINITY_DN49341_c0_g2_i1, TRINITY_DN58223_c3_g1_i1, TRINITY_DN54252_c2_g2_i1, TRINITY_DN61696_c1_g8_i1, TRINITY_DN40695_c0_g2_i1, TRINITY_DN62211_c2_g1_i1, TRINITY_DN52822_c1_g1_i1, TRINITY_DN62544_c0_g1_i1, TRINITY_DN52378_c0_g1_i1, TRINITY_D…	map00860
Porphyrin and chlorophyll metabolism	76	oxidase	ec:1.3.3.4	2	TRINITY_DN61258_c4_g1_i1, TRINITY_DN61270_c0_g1_i1	map00860
Porphyrin and chlorophyll metabolism	76	oxidase	ec:1.3.3.3	6	TRINITY_DN44545_c1_g3_i1, TRINITY_DN53279_c0_g1_i1, TRINITY_DN55508_c4_g1_i1, TRINITY_DN56106_c5_g1_i1, TRINITY_DN45792_c1_g1_i1, TRINITY_DN56106_c0_g1_i1	map00860
Porphyrin and chlorophyll metabolism	76	chelatase	ec:6.6.1.1	3	TRINITY_DN64519_c3_g1_i1, TRINITY_DN52569_c1_g1_i1, TRINITY_DN50213_c0_g1_i1	map00860
Glycosphingolipid biosynthesis - globo series	27	2-alpha-L-fucosyltransferase	ec:2.4.1.69	25	TRINITY_DN8827_c0_g1_i1, TRINITY_DN44508_c4_g1_i1, TRINITY_DN63391_c6_g5_i1, TRINITY_DN44508_c3_g2_i1, TRINITY_DN63391_c1_g1_i1, TRINITY_DN57992_c5_g1_i1, TRINITY_DN44508_c1_g1_i1, TRINITY_DN67712_c0_g1_i1, TRINITY_DN63391_c7_g1_i1, TRINITY_DN38875_c2_g1_i1, TRINITY_DN63391_c12_g1_i1, TRINITY_DN44508_c4_g2_i1, TRINITY_DN55739_c0_g1_i1, TRINITY_DN44508_c3_g1_i1, TRINITY_DN63391_c6_g4_i1, TRINITY_D…	map00603
Glycosphingolipid biosynthesis - globo series	27	melibiase	ec:3.2.1.22	2	TRINITY_DN46160_c0_g2_i1, TRINITY_DN49309_c1_g1_i1	map00603
Cysteine and methionine metabolism	55	synthase	ec:3.1.3.77	3	TRINITY_DN93_c0_g1_i1, TRINITY_DN50369_c0_g1_i1, TRINITY_DN50881_c0_g1_i1	map00270
Cysteine and methionine metabolism	55	kinase	ec:2.7.1.100	2	TRINITY_DN49236_c0_g1_i1, TRINITY_DN65184_c3_g1_i1	map00270
Cysteine and methionine metabolism	55	gamma-lyase	ec:4.4.1.11	1	TRINITY_DN57544_c10_g1_i1	map00270
Cysteine and methionine metabolism	55	racemase	ec:5.1.1.10	3	TRINITY_DN54661_c2_g1_i1, TRINITY_DN53544_c4_g1_i1, TRINITY_DN59581_c3_g1_i1	map00270
Cysteine and methionine metabolism	55	synthase	ec:6.3.2.3	5	TRINITY_DN63681_c1_g1_i1, TRINITY_DN56109_c4_g2_i1, TRINITY_DN62959_c4_g1_i1, TRINITY_DN62959_c4_g2_i1, TRINITY_DN58811_c5_g1_i1	map00270
Cysteine and methionine metabolism	55	ligase	ec:6.3.2.2	1	TRINITY_DN51530_c2_g1_i1	map00270
Cysteine and methionine metabolism	55	synthase	ec:2.5.1.16	3	TRINITY_DN51616_c5_g1_i1, TRINITY_DN57639_c1_g1_i1, TRINITY_DN51751_c5_g1_i1	map00270
Cysteine and methionine metabolism	55	synthase	ec:2.5.1.22	1	TRINITY_DN46136_c0_g1_i1	map00270
Cysteine and methionine metabolism	55	O-acetyltransferase	ec:2.3.1.30	4	TRINITY_DN50292_c1_g1_i1, TRINITY_DN40150_c0_g1_i1, TRINITY_DN51529_c8_g1_i1, TRINITY_DN50292_c1_g3_i1	map00270
Cysteine and methionine metabolism	55	synthase	ec:2.5.1.47	11	TRINITY_DN52394_c8_g1_i1, TRINITY_DN67124_c0_g1_i1, TRINITY_DN48120_c1_g1_i1, TRINITY_DN52394_c3_g1_i1, TRINITY_DN59181_c3_g1_i1, TRINITY_DN52394_c5_g1_i1, TRINITY_DN55897_c0_g1_i1, TRINITY_DN52394_c6_g1_i1, TRINITY_DN68631_c0_g1_i1, TRINITY_DN52394_c6_g2_i1, TRINITY_DN48120_c4_g1_i1	map00270
Cysteine and methionine metabolism	55	1-phosphate dehydratase	ec:4.2.1.109	3	TRINITY_DN93_c0_g1_i1, TRINITY_DN50369_c0_g1_i1, TRINITY_DN50881_c0_g1_i1	map00270
Cysteine and methionine metabolism	55	ammonia-lyase	ec:4.3.1.17	1	TRINITY_DN54661_c2_g1_i1	map00270
Cysteine and methionine metabolism	55	dehydrogenase	ec:1.1.1.37	11	TRINITY_DN57405_c1_g1_i1, TRINITY_DN57923_c4_g1_i1, TRINITY_DN57405_c1_g2_i1, TRINITY_DN63686_c6_g1_i1, TRINITY_DN47042_c0_g1_i1, TRINITY_DN57405_c1_g3_i1, TRINITY_DN41712_c0_g1_i1, TRINITY_DN50197_c3_g3_i1, TRINITY_DN45225_c0_g1_i1, TRINITY_DN57405_c0_g1_i1, TRINITY_DN57923_c3_g1_i1	map00270
Cysteine and methionine metabolism	55	beta-lyase	ec:4.4.1.8	1	TRINITY_DN56068_c0_g1_i1	map00270
Cysteine and methionine metabolism	55	isomerase	ec:5.3.1.23	9	TRINITY_DN51868_c1_g1_i1, TRINITY_DN57078_c4_g1_i1, TRINITY_DN55273_c4_g1_i1, TRINITY_DN55273_c4_g2_i1, TRINITY_DN55273_c0_g2_i1, TRINITY_DN55273_c0_g1_i1, TRINITY_DN49836_c2_g1_i1, TRINITY_DN55273_c5_g2_i1, TRINITY_DN55273_c5_g1_i1	map00270
Glycosphingolipid biosynthesis - lacto and neolacto series	25	2-alpha-L-fucosyltransferase	ec:2.4.1.69	25	TRINITY_DN8827_c0_g1_i1, TRINITY_DN44508_c4_g1_i1, TRINITY_DN63391_c6_g5_i1, TRINITY_DN44508_c3_g2_i1, TRINITY_DN63391_c1_g1_i1, TRINITY_DN57992_c5_g1_i1, TRINITY_DN44508_c1_g1_i1, TRINITY_DN67712_c0_g1_i1, TRINITY_DN63391_c7_g1_i1, TRINITY_DN38875_c2_g1_i1, TRINITY_DN63391_c12_g1_i1, TRINITY_DN44508_c4_g2_i1, TRINITY_DN55739_c0_g1_i1, TRINITY_DN44508_c3_g1_i1, TRINITY_DN63391_c6_g4_i1, TRINITY_D…	map00601
Nicotinate and nicotinamide metabolism	40	diphosphatase	ec:3.6.1.9	2	TRINITY_DN60369_c4_g3_i1, TRINITY_DN47658_c0_g1_i1	map00760
Nicotinate and nicotinamide metabolism	40	dehydrogenase (NAD+)	ec:1.2.1.24	2	TRINITY_DN57151_c1_g1_i1, TRINITY_DN52174_c4_g1_i1	map00760
Nicotinate and nicotinamide metabolism	40	kinase	ec:2.7.1.23	1	TRINITY_DN58950_c1_g1_i1	map00760
Nicotinate and nicotinamide metabolism	40	adenylyltransferase	ec:2.7.7.1	3	TRINITY_DN58825_c0_g2_i1, TRINITY_DN58825_c0_g3_i1, TRINITY_DN58825_c0_g1_i1	map00760
Nicotinate and nicotinamide metabolism	40	diphosphatase	ec:3.6.1.22	1	TRINITY_DN47658_c0_g1_i1	map00760
Nicotinate and nicotinamide metabolism	40	dehydrogenase [NAD(P)+]	ec:1.2.1.16	2	TRINITY_DN57151_c1_g1_i1, TRINITY_DN52174_c4_g1_i1	map00760
Nicotinate and nicotinamide metabolism	40	uridine 5'-nucleotidase	ec:3.1.3.5	2	TRINITY_DN56408_c3_g1_i1, TRINITY_DN59734_c0_g2_i1	map00760
Nicotinate and nicotinamide metabolism	40	nucleosidase	ec:3.2.2.1	14	TRINITY_DN38806_c2_g1_i1, TRINITY_DN38806_c3_g1_i1, TRINITY_DN52513_c8_g1_i1, TRINITY_DN38806_c3_g2_i1, TRINITY_DN58016_c4_g3_i1, TRINITY_DN54612_c2_g1_i1, TRINITY_DN63279_c0_g4_i1, TRINITY_DN63279_c0_g3_i1, TRINITY_DN63279_c0_g1_i1, TRINITY_DN44207_c2_g1_i1, TRINITY_DN63279_c0_g2_i1, TRINITY_DN58016_c4_g1_i1, TRINITY_DN54173_c1_g1_i1, TRINITY_DN38806_c1_g1_i1	map00760
Nicotinate and nicotinamide metabolism	40	adenylyltransferase	ec:2.7.7.18	3	TRINITY_DN58825_c0_g2_i1, TRINITY_DN58825_c0_g3_i1, TRINITY_DN58825_c0_g1_i1	map00760
Nicotinate and nicotinamide metabolism	40	nicotinamide deaminase	ec:3.5.1.19	1	TRINITY_DN49263_c1_g1_i1	map00760
Nicotinate and nicotinamide metabolism	40	oxidase	ec:1.2.3.1	11	TRINITY_DN44040_c2_g1_i1, TRINITY_DN65607_c2_g4_i1, TRINITY_DN43565_c1_g1_i1, TRINITY_DN9832_c0_g1_i1, TRINITY_DN44040_c1_g1_i1, TRINITY_DN7612_c0_g1_i1, TRINITY_DN44040_c0_g2_i1, TRINITY_DN65607_c2_g1_i1, TRINITY_DN65607_c2_g2_i1, TRINITY_DN65607_c2_g3_i1, TRINITY_DN44040_c0_g1_i1	map00760
Nicotinate and nicotinamide metabolism	40	synthase (glutamine-hydrolysing)	ec:6.3.5.1	1	TRINITY_DN54228_c3_g1_i1	map00760
Nicotinate and nicotinamide metabolism	40	diphosphorylase (carboxylating)	ec:2.4.2.19	3	TRINITY_DN61388_c2_g1_i1, TRINITY_DN55417_c2_g1_i1, TRINITY_DN52131_c6_g1_i1	map00760
Sphingolipid metabolism	27	phosphodiesterase D	ec:3.1.4.41	1	TRINITY_DN63439_c3_g1_i1	map00600
Sphingolipid metabolism	27	phosphodiesterase	ec:3.1.4.12	1	TRINITY_DN51629_c2_g1_i1	map00600
Sphingolipid metabolism	27	kinase	ec:2.7.1.138	2	TRINITY_DN47732_c2_g1_i1, TRINITY_DN65732_c0_g1_i1	map00600
Sphingolipid metabolism	27	phosphatase	ec:3.1.3.4	12	TRINITY_DN56694_c5_g1_i1, TRINITY_DN45177_c3_g1_i1, TRINITY_DN59815_c1_g1_i1, TRINITY_DN47229_c1_g1_i1, TRINITY_DN41674_c0_g2_i1, TRINITY_DN50571_c0_g1_i1, TRINITY_DN50146_c2_g1_i1, TRINITY_DN59540_c2_g1_i1, TRINITY_DN58804_c1_g2_i1, TRINITY_DN56694_c6_g1_i1, TRINITY_DN64481_c1_g1_i1, TRINITY_DN56207_c3_g2_i1	map00600
Sphingolipid metabolism	27	psychosine hydrolase	ec:3.2.1.45	7	TRINITY_DN64122_c2_g2_i1, TRINITY_DN64122_c2_g1_i1, TRINITY_DN57135_c1_g1_i1, TRINITY_DN58328_c5_g1_i1, TRINITY_DN63351_c5_g1_i1, TRINITY_DN59042_c2_g4_i1, TRINITY_DN59042_c2_g1_i1	map00600
Sphingolipid metabolism	27	acylsphingosine deacylase	ec:3.5.1.23	1	TRINITY_DN59257_c3_g1_i1	map00600
Sphingolipid metabolism	27	glucosyltransferase	ec:2.4.1.80	1	TRINITY_DN61017_c1_g1_i1	map00600
Sphingolipid metabolism	27	melibiase	ec:3.2.1.22	2	TRINITY_DN46160_c0_g2_i1, TRINITY_DN49309_c1_g1_i1	map00600
C5-Branched dibasic acid metabolism	2	ligase (ADP-forming)	ec:6.2.1.5	2	TRINITY_DN54712_c10_g1_i1, TRINITY_DN46133_c0_g1_i1	map00660
Glycolysis / Gluconeogenesis	98	1-phosphotransferase	ec:2.7.1.90	7	TRINITY_DN46753_c0_g1_i1, TRINITY_DN49487_c0_g2_i1, TRINITY_DN55050_c0_g1_i1, TRINITY_DN64395_c1_g1_i1, TRINITY_DN46488_c0_g2_i1, TRINITY_DN43087_c0_g1_i1, TRINITY_DN51479_c0_g1_i1	map00010
Glycolysis / Gluconeogenesis	98	aldolase	ec:4.1.2.13	12	TRINITY_DN42189_c0_g1_i1, TRINITY_DN59861_c4_g2_i1, TRINITY_DN57691_c1_g1_i1, TRINITY_DN57691_c0_g1_i1, TRINITY_DN43211_c0_g1_i1, TRINITY_DN54088_c1_g1_i1, TRINITY_DN37185_c0_g2_i1, TRINITY_DN47696_c0_g1_i1, TRINITY_DN37185_c0_g3_i1, TRINITY_DN57691_c2_g1_i1, TRINITY_DN37185_c0_g1_i1, TRINITY_DN57691_c0_g2_i1	map00010
Glycolysis / Gluconeogenesis	98	carboxykinase (ATP)	ec:4.1.1.49	1	TRINITY_DN52281_c2_g1_i1	map00010
Glycolysis / Gluconeogenesis	98	kinase	ec:2.7.2.3	14	TRINITY_DN54202_c3_g1_i1, TRINITY_DN54202_c3_g2_i1, TRINITY_DN64810_c5_g1_i1, TRINITY_DN59699_c8_g1_i1, TRINITY_DN54788_c0_g1_i1, TRINITY_DN38318_c0_g5_i1, TRINITY_DN38318_c0_g6_i1, TRINITY_DN54202_c4_g1_i1, TRINITY_DN38318_c0_g1_i1, TRINITY_DN38318_c0_g2_i1, TRINITY_DN50862_c0_g1_i1, TRINITY_DN38318_c0_g4_i1, TRINITY_DN38318_c0_g3_i1, TRINITY_DN65010_c4_g1_i1	map00010
Glycolysis / Gluconeogenesis	98	kinase	ec:2.7.1.40	15	TRINITY_DN60343_c2_g2_i1, TRINITY_DN54738_c2_g1_i1, TRINITY_DN57432_c4_g1_i1, TRINITY_DN50106_c3_g1_i1, TRINITY_DN50106_c2_g6_i1, TRINITY_DN50106_c4_g1_i1, TRINITY_DN50106_c2_g3_i1, TRINITY_DN50106_c2_g1_i1, TRINITY_DN62057_c1_g1_i1, TRINITY_DN62658_c0_g1_i1, TRINITY_DN50214_c1_g1_i1, TRINITY_DN49957_c7_g1_i1, TRINITY_DN50106_c5_g1_i1, TRINITY_DN49957_c3_g1_i1, TRINITY_DN60343_c2_g1_i1	map00010
Glycolysis / Gluconeogenesis	98	glucokinase (phosphorylating)	ec:2.7.1.2	7	TRINITY_DN57730_c1_g2_i1, TRINITY_DN55934_c5_g1_i1, TRINITY_DN56800_c0_g1_i1, TRINITY_DN58525_c4_g1_i1, TRINITY_DN60263_c1_g1_i1, TRINITY_DN58506_c0_g1_i1, TRINITY_DN62623_c2_g1_i1	map00010
Glycolysis / Gluconeogenesis	98	hexokinase type IV glucokinase	ec:2.7.1.1	10	TRINITY_DN57730_c1_g2_i1, TRINITY_DN55934_c5_g1_i1, TRINITY_DN56800_c0_g1_i1, TRINITY_DN56248_c2_g6_i1, TRINITY_DN58525_c4_g1_i1, TRINITY_DN60263_c1_g1_i1, TRINITY_DN58506_c0_g1_i1, TRINITY_DN47932_c0_g1_i1, TRINITY_DN57954_c1_g1_i1, TRINITY_DN62623_c2_g1_i1	map00010
Glycolysis / Gluconeogenesis	98	dehydrogenase (NAD(P)+) (phosphorylating)	ec:1.2.1.59	2	TRINITY_DN62729_c4_g1_i1, TRINITY_DN62729_c5_g1_i1	map00010
Glycolysis / Gluconeogenesis	98	phosphohexokinase	ec:2.7.1.11	7	TRINITY_DN46753_c0_g1_i1, TRINITY_DN49487_c0_g2_i1, TRINITY_DN55050_c0_g1_i1, TRINITY_DN64395_c1_g1_i1, TRINITY_DN46488_c0_g2_i1, TRINITY_DN43087_c0_g1_i1, TRINITY_DN51479_c0_g1_i1	map00010
Glycolysis / Gluconeogenesis	98	decarboxylase	ec:4.1.1.1	1	TRINITY_DN63534_c1_g1_i1	map00010
Glycolysis / Gluconeogenesis	98	acetyltransferase	ec:2.3.1.12	2	TRINITY_DN53098_c4_g1_i1, TRINITY_DN51962_c0_g1_i1	map00010
Glycolysis / Gluconeogenesis	98	hexose diphosphatase	ec:3.1.3.11	5	TRINITY_DN50661_c0_g1_i1, TRINITY_DN54223_c6_g2_i1, TRINITY_DN49443_c6_g1_i1, TRINITY_DN62612_c2_g1_i1, TRINITY_DN46850_c0_g1_i1	map00010
Glycolysis / Gluconeogenesis	98	dehydrogenase (phosphorylating)	ec:1.2.1.12	2	TRINITY_DN62729_c4_g1_i1, TRINITY_DN62729_c5_g1_i1	map00010
Glycolysis / Gluconeogenesis	98	dehydrogenase	ec:1.8.1.4	3	TRINITY_DN52639_c1_g1_i1, TRINITY_DN54423_c0_g2_i1, TRINITY_DN62095_c1_g1_i1	map00010
Glycolysis / Gluconeogenesis	98	isomerase	ec:5.3.1.1	3	TRINITY_DN50032_c3_g1_i1, TRINITY_DN49393_c0_g1_i1, TRINITY_DN44464_c0_g1_i1	map00010
Glycolysis / Gluconeogenesis	98	isomerase	ec:5.3.1.9	2	TRINITY_DN59230_c2_g1_i1, TRINITY_DN52995_c2_g2_i1	map00010
Glycolysis / Gluconeogenesis	98	dehydrogenase (NADP+)	ec:1.1.1.2	1	TRINITY_DN60889_c0_g1_i1	map00010
Glycolysis / Gluconeogenesis	98	dehydrogenase	ec:1.1.1.1	1	TRINITY_DN47826_c0_g1_i1	map00010
Glycolysis / Gluconeogenesis	98	hydratase	ec:4.2.1.11	7	TRINITY_DN49468_c2_g1_i1, TRINITY_DN48143_c0_g1_i1, TRINITY_DN45589_c0_g1_i1, TRINITY_DN46428_c1_g1_i1, TRINITY_DN52333_c2_g1_i1, TRINITY_DN52333_c1_g1_i1, TRINITY_DN63884_c4_g2_i1	map00010
Glycolysis / Gluconeogenesis	98	dehydrogenase [NAD(P)+]	ec:1.2.1.5	2	TRINITY_DN57151_c1_g1_i1, TRINITY_DN52174_c4_g1_i1	map00010
Glycolysis / Gluconeogenesis	98	dehydrogenase (NAD+)	ec:1.2.1.3	4	TRINITY_DN57151_c1_g1_i1, TRINITY_DN58156_c3_g1_i1, TRINITY_DN52174_c4_g1_i1, TRINITY_DN50807_c0_g1_i1	map00010
Glycolysis / Gluconeogenesis	98	(alpha-D-glucose-1,6-bisphosphate-dependent)	ec:5.4.2.2	2	TRINITY_DN48711_c0_g2_i1, TRINITY_DN46429_c0_g1_i1	map00010
Glycolysis / Gluconeogenesis	98	dehydrogenase (acetyl-transferring)	ec:1.2.4.1	6	TRINITY_DN49780_c0_g1_i1, TRINITY_DN50872_c1_g1_i1, TRINITY_DN51176_c0_g1_i1, TRINITY_DN49780_c5_g1_i1, TRINITY_DN50879_c0_g1_i1, TRINITY_DN49780_c7_g1_i1	map00010
Starch and sucrose metabolism	307	diphosphatase	ec:3.6.1.9	2	TRINITY_DN60369_c4_g3_i1, TRINITY_DN47658_c0_g1_i1	map00500
Starch and sucrose metabolism	307	glucokinase (phosphorylating)	ec:2.7.1.2	7	TRINITY_DN57730_c1_g2_i1, TRINITY_DN55934_c5_g1_i1, TRINITY_DN56800_c0_g1_i1, TRINITY_DN58525_c4_g1_i1, TRINITY_DN60263_c1_g1_i1, TRINITY_DN58506_c0_g1_i1, TRINITY_DN62623_c2_g1_i1	map00500
Starch and sucrose metabolism	307	hexokinase type IV glucokinase	ec:2.7.1.1	10	TRINITY_DN57730_c1_g2_i1, TRINITY_DN55934_c5_g1_i1, TRINITY_DN56800_c0_g1_i1, TRINITY_DN56248_c2_g6_i1, TRINITY_DN58525_c4_g1_i1, TRINITY_DN60263_c1_g1_i1, TRINITY_DN58506_c0_g1_i1, TRINITY_DN47932_c0_g1_i1, TRINITY_DN57954_c1_g1_i1, TRINITY_DN62623_c2_g1_i1	map00500
Starch and sucrose metabolism	307	fructokinase (phosphorylating)	ec:2.7.1.4	10	TRINITY_DN57730_c1_g2_i1, TRINITY_DN55934_c5_g1_i1, TRINITY_DN56800_c0_g1_i1, TRINITY_DN56248_c2_g6_i1, TRINITY_DN58525_c4_g1_i1, TRINITY_DN60263_c1_g1_i1, TRINITY_DN58506_c0_g1_i1, TRINITY_DN47932_c0_g1_i1, TRINITY_DN57954_c1_g1_i1, TRINITY_DN62623_c2_g1_i1	map00500
Starch and sucrose metabolism	307	trehalose 6-phosphatase	ec:3.1.3.12	12	TRINITY_DN38784_c1_g1_i1, TRINITY_DN52648_c2_g1_i1, TRINITY_DN61784_c7_g1_i1, TRINITY_DN57817_c0_g1_i1, TRINITY_DN664_c0_g1_i1, TRINITY_DN54935_c2_g1_i1, TRINITY_DN38724_c0_g2_i1, TRINITY_DN38724_c0_g1_i1, TRINITY_DN38784_c2_g1_i1, TRINITY_DN62830_c2_g1_i1, TRINITY_DN64554_c2_g2_i1, TRINITY_DN54064_c1_g1_i1	map00500
Starch and sucrose metabolism	307	diphosphatase	ec:3.6.1.21	1	TRINITY_DN58708_c0_g1_i1	map00500
Starch and sucrose metabolism	307	pectin demethoxylase	ec:3.1.1.11	26	TRINITY_DN43261_c1_g1_i1, TRINITY_DN61818_c2_g1_i1, TRINITY_DN38142_c0_g1_i1, TRINITY_DN62027_c2_g2_i1, TRINITY_DN47169_c2_g1_i1, TRINITY_DN61947_c0_g1_i1, TRINITY_DN58894_c3_g1_i1, TRINITY_DN47169_c3_g2_i1, TRINITY_DN47169_c3_g4_i1, TRINITY_DN54901_c0_g1_i1, TRINITY_DN43287_c0_g1_i1, TRINITY_DN45581_c0_g1_i1, TRINITY_DN58894_c1_g1_i1, TRINITY_DN43261_c1_g2_i1, TRINITY_DN63306_c3_g1_i1, TRINITY_D…	map00500
Starch and sucrose metabolism	307	endo-1,4-beta-D-glucanase	ec:3.2.1.4	26	TRINITY_DN47669_c0_g1_i1, TRINITY_DN67267_c0_g2_i1, TRINITY_DN49501_c5_g1_i1, TRINITY_DN53319_c3_g1_i1, TRINITY_DN48161_c3_g1_i1, TRINITY_DN43012_c2_g1_i1, TRINITY_DN46919_c3_g1_i1, TRINITY_DN62455_c2_g1_i1, TRINITY_DN62455_c2_g3_i1, TRINITY_DN57195_c2_g1_i1, TRINITY_DN53319_c0_g1_i1, TRINITY_DN43012_c0_g1_i1, TRINITY_DN53319_c4_g2_i1, TRINITY_DN48161_c2_g1_i1, TRINITY_DN37836_c0_g1_i1, TRINITY_D…	map00500
Starch and sucrose metabolism	307	saccharogen amylase	ec:3.2.1.2	3	TRINITY_DN51228_c0_g1_i1, TRINITY_DN38069_c0_g1_i1, TRINITY_DN44995_c0_g1_i1	map00500
Starch and sucrose metabolism	307	glycogenase	ec:3.2.1.1	1	TRINITY_DN56926_c1_g1_i1	map00500
Starch and sucrose metabolism	307	isomerase	ec:5.3.1.9	2	TRINITY_DN59230_c2_g1_i1, TRINITY_DN52995_c2_g2_i1	map00500
Starch and sucrose metabolism	307	alpha-glucosidase	ec:3.2.1.48	4	TRINITY_DN62292_c1_g1_i1, TRINITY_DN51574_c3_g1_i1, TRINITY_DN52864_c4_g1_i1, TRINITY_DN52864_c4_g2_i1	map00500
Starch and sucrose metabolism	307	1,3-beta-glucosidase	ec:3.2.1.58	3	TRINITY_DN46559_c0_g1_i1, TRINITY_DN6553_c0_g2_i1, TRINITY_DN6553_c0_g1_i1	map00500
Starch and sucrose metabolism	307	adenylyltransferase	ec:2.7.7.27	9	TRINITY_DN61226_c1_g1_i1, TRINITY_DN52044_c3_g2_i1, TRINITY_DN62527_c5_g1_i1, TRINITY_DN53804_c0_g1_i1, TRINITY_DN45696_c0_g1_i1, TRINITY_DN53061_c3_g1_i1, TRINITY_DN53061_c3_g2_i1, TRINITY_DN48285_c0_g1_i1, TRINITY_DN50684_c1_g1_i1	map00500
Starch and sucrose metabolism	307	(alpha-D-glucose-1,6-bisphosphate-dependent)	ec:5.4.2.2	2	TRINITY_DN48711_c0_g2_i1, TRINITY_DN46429_c0_g1_i1	map00500
Starch and sucrose metabolism	307	gentiobiase	ec:3.2.1.21	17	TRINITY_DN56074_c0_g2_i1, TRINITY_DN3889_c0_g1_i1, TRINITY_DN41493_c0_g1_i1, TRINITY_DN50163_c8_g3_i1, TRINITY_DN56074_c0_g1_i1, TRINITY_DN50163_c7_g1_i1, TRINITY_DN46559_c0_g1_i1, TRINITY_DN52367_c0_g1_i1, TRINITY_DN53674_c5_g2_i1, TRINITY_DN5754_c0_g1_i1, TRINITY_DN6553_c0_g2_i1, TRINITY_DN49445_c4_g1_i1, TRINITY_DN45477_c2_g3_i1, TRINITY_DN51352_c1_g1_i1, TRINITY_DN6553_c0_g1_i1, TRINITY_DN454…	map00500
Starch and sucrose metabolism	307	trehalase	ec:3.2.1.28	1	TRINITY_DN57632_c1_g1_i1	map00500
Starch and sucrose metabolism	307	invertase	ec:3.2.1.26	4	TRINITY_DN62292_c1_g1_i1, TRINITY_DN51574_c3_g1_i1, TRINITY_DN52864_c4_g1_i1, TRINITY_DN52864_c4_g2_i1	map00500
Starch and sucrose metabolism	307	6-dehydrogenase	ec:1.1.1.22	1	TRINITY_DN49428_c0_g1_i1	map00500
Starch and sucrose metabolism	307	endo-1,3-beta-D-glucosidase	ec:3.2.1.39	6	TRINITY_DN3889_c0_g1_i1, TRINITY_DN41493_c0_g1_i1, TRINITY_DN52367_c0_g1_i1, TRINITY_DN45477_c2_g3_i1, TRINITY_DN45477_c2_g2_i1, TRINITY_DN45477_c2_g1_i1	map00500
Starch and sucrose metabolism	307	4-alpha-galacturonosyltransferase	ec:2.4.1.43	30	TRINITY_DN65373_c3_g6_i1, TRINITY_DN65373_c3_g2_i1, TRINITY_DN45102_c1_g1_i1, TRINITY_DN61934_c2_g1_i1, TRINITY_DN59832_c6_g1_i1, TRINITY_DN65373_c3_g4_i1, TRINITY_DN53491_c2_g1_i1, TRINITY_DN40310_c0_g1_i1, TRINITY_DN60338_c2_g2_i1, TRINITY_DN60414_c2_g1_i1, TRINITY_DN60979_c0_g1_i1, TRINITY_DN60338_c1_g1_i1, TRINITY_DN60645_c2_g1_i1, TRINITY_DN61397_c1_g1_i1, TRINITY_DN43063_c0_g2_i1, TRINITY_D…	map00500
Starch and sucrose metabolism	307	1,4-beta-xylosidase	ec:3.2.1.37	10	TRINITY_DN64310_c0_g1_i1, TRINITY_DN59855_c4_g1_i1, TRINITY_DN62825_c3_g1_i1, TRINITY_DN3864_c0_g1_i1, TRINITY_DN55491_c3_g1_i1, TRINITY_DN62825_c3_g2_i1, TRINITY_DN55491_c0_g1_i1, TRINITY_DN41485_c0_g1_i1, TRINITY_DN55491_c2_g1_i1, TRINITY_DN55491_c1_g1_i1	map00500
Starch and sucrose metabolism	307	1-naphthol glucuronyltransferase	ec:2.4.1.17	17	TRINITY_DN54766_c3_g3_i1, TRINITY_DN55415_c1_g1_i1, TRINITY_DN51499_c1_g1_i1, TRINITY_DN50200_c2_g1_i1, TRINITY_DN61696_c1_g2_i1, TRINITY_DN52822_c6_g1_i1, TRINITY_DN49341_c0_g2_i1, TRINITY_DN58223_c3_g1_i1, TRINITY_DN54252_c2_g2_i1, TRINITY_DN61696_c1_g8_i1, TRINITY_DN40695_c0_g2_i1, TRINITY_DN62211_c2_g1_i1, TRINITY_DN52822_c1_g1_i1, TRINITY_DN62544_c0_g1_i1, TRINITY_DN52378_c0_g1_i1, TRINITY_D…	map00500
Starch and sucrose metabolism	307	synthase	ec:2.4.1.14	6	TRINITY_DN59347_c0_g1_i1, TRINITY_DN61569_c0_g1_i1, TRINITY_DN49187_c1_g1_i1, TRINITY_DN55442_c2_g1_i1, TRINITY_DN60309_c10_g1_i1, TRINITY_DN59260_c3_g1_i1	map00500
Starch and sucrose metabolism	307	synthase	ec:2.4.1.13	10	TRINITY_DN61569_c0_g1_i1, TRINITY_DN49187_c1_g1_i1, TRINITY_DN59355_c0_g1_i1, TRINITY_DN55442_c2_g1_i1, TRINITY_DN60309_c10_g1_i1, TRINITY_DN46477_c0_g1_i1, TRINITY_DN64884_c4_g1_i1, TRINITY_DN59260_c3_g1_i1, TRINITY_DN49097_c5_g1_i1, TRINITY_DN52812_c1_g1_i1	map00500
Starch and sucrose metabolism	307	synthase (UDP-forming)	ec:2.4.1.12	75	TRINITY_DN54384_c2_g1_i1, TRINITY_DN55180_c4_g1_i1, TRINITY_DN47665_c1_g1_i1, TRINITY_DN57887_c1_g1_i1, TRINITY_DN51705_c0_g1_i1, TRINITY_DN64506_c5_g1_i1, TRINITY_DN60501_c0_g1_i1, TRINITY_DN55180_c1_g1_i1, TRINITY_DN64506_c1_g1_i1, TRINITY_DN51443_c1_g1_i1, TRINITY_DN55180_c0_g1_i1, TRINITY_DN65103_c3_g1_i1, TRINITY_DN53644_c1_g3_i1, TRINITY_DN53150_c3_g1_i1, TRINITY_DN65402_c1_g1_i1, TRINITY_D…	map00500
Starch and sucrose metabolism	307	synthase	ec:2.4.1.11	14	TRINITY_DN52638_c0_g1_i1, TRINITY_DN65682_c1_g3_i1, TRINITY_DN63627_c2_g1_i1, TRINITY_DN52572_c2_g1_i1, TRINITY_DN52572_c5_g1_i1, TRINITY_DN65682_c1_g1_i1, TRINITY_DN52572_c1_g1_i1, TRINITY_DN61973_c0_g1_i1, TRINITY_DN61465_c2_g1_i1, TRINITY_DN60415_c0_g2_i1, TRINITY_DN60415_c0_g1_i1, TRINITY_DN52572_c4_g1_i1, TRINITY_DN56116_c1_g1_i1, TRINITY_DN52572_c3_g1_i1	map00500
Starch and sucrose metabolism	307	synthase (glycosyl-transferring)	ec:2.4.1.21	3	TRINITY_DN65682_c1_g3_i1, TRINITY_DN60415_c0_g2_i1, TRINITY_DN60415_c0_g1_i1	map00500
Starch and sucrose metabolism	307	pectin depolymerase	ec:3.2.1.15	33	TRINITY_DN59730_c3_g2_i1, TRINITY_DN62093_c2_g1_i1, TRINITY_DN60511_c1_g1_i1, TRINITY_DN49061_c0_g1_i1, TRINITY_DN56444_c0_g1_i1, TRINITY_DN50123_c0_g1_i1, TRINITY_DN56976_c3_g1_i1, TRINITY_DN60383_c5_g1_i1, TRINITY_DN56976_c3_g3_i1, TRINITY_DN44135_c1_g1_i1, TRINITY_DN50428_c0_g1_i1, TRINITY_DN56270_c5_g1_i1, TRINITY_DN65099_c3_g1_i1, TRINITY_DN59237_c3_g1_i1, TRINITY_DN59730_c0_g1_i1, TRINITY_D…	map00500
Ether lipid metabolism	30	synthase	ec:2.3.1.25	1	TRINITY_DN52487_c5_g1_i1	map00565
Ether lipid metabolism	30	A2	ec:3.1.1.4	3	TRINITY_DN44941_c1_g1_i1, TRINITY_DN45446_c0_g1_i1, TRINITY_DN59876_c1_g1_i1	map00565
Ether lipid metabolism	30	phosphatase	ec:3.1.3.4	12	TRINITY_DN56694_c5_g1_i1, TRINITY_DN45177_c3_g1_i1, TRINITY_DN59815_c1_g1_i1, TRINITY_DN47229_c1_g1_i1, TRINITY_DN41674_c0_g2_i1, TRINITY_DN50571_c0_g1_i1, TRINITY_DN50146_c2_g1_i1, TRINITY_DN59540_c2_g1_i1, TRINITY_DN58804_c1_g2_i1, TRINITY_DN56694_c6_g1_i1, TRINITY_DN64481_c1_g1_i1, TRINITY_DN56207_c3_g2_i1	map00565
Ether lipid metabolism	30	D	ec:3.1.4.4	14	TRINITY_DN55543_c0_g1_i1, TRINITY_DN62668_c3_g3_i1, TRINITY_DN63659_c1_g1_i1, TRINITY_DN64494_c3_g2_i1, TRINITY_DN64494_c3_g1_i1, TRINITY_DN64494_c1_g1_i1, TRINITY_DN51193_c2_g1_i1, TRINITY_DN40890_c1_g2_i1, TRINITY_DN64494_c0_g1_i1, TRINITY_DN64494_c2_g1_i1, TRINITY_DN40890_c1_g1_i1, TRINITY_DN51193_c1_g1_i1, TRINITY_DN60884_c0_g1_i1, TRINITY_DN52068_c0_g1_i1	map00565
Cutin, suberine and wax biosynthesis	3	O-acyltransferase	ec:2.3.1.20	3	TRINITY_DN52429_c0_g1_i1, TRINITY_DN46128_c6_g1_i1, TRINITY_DN60563_c2_g1_i1	map00073
Glycerophospholipid metabolism	90	phosphodiesterase	ec:3.1.4.46	26	TRINITY_DN56832_c3_g1_i1, TRINITY_DN62293_c2_g2_i1, TRINITY_DN48351_c1_g1_i1, TRINITY_DN62293_c6_g3_i1, TRINITY_DN58692_c3_g3_i1, TRINITY_DN62293_c6_g1_i1, TRINITY_DN48351_c0_g2_i1, TRINITY_DN56832_c0_g2_i1, TRINITY_DN62293_c4_g1_i1, TRINITY_DN60924_c10_g1_i1, TRINITY_DN45243_c5_g1_i1, TRINITY_DN63255_c4_g1_i1, TRINITY_DN58335_c0_g1_i1, TRINITY_DN62293_c2_g1_i1, TRINITY_DN8065_c0_g1_i1, TRINITY_D…	map00564
Glycerophospholipid metabolism	90	kinase (ATP)	ec:2.7.1.107	14	TRINITY_DN59979_c0_g1_i1, TRINITY_DN60674_c0_g1_i1, TRINITY_DN59979_c0_g2_i1, TRINITY_DN56770_c7_g2_i1, TRINITY_DN59979_c1_g1_i1, TRINITY_DN46112_c0_g1_i1, TRINITY_DN54873_c1_g1_i1, TRINITY_DN64405_c1_g2_i1, TRINITY_DN54873_c2_g1_i1, TRINITY_DN59485_c5_g1_i1, TRINITY_DN59485_c2_g1_i1, TRINITY_DN56770_c7_g1_i1, TRINITY_DN54873_c3_g1_i1, TRINITY_DN61819_c3_g1_i1	map00564
Glycerophospholipid metabolism	90	1-O-acyltransferase	ec:2.3.1.15	1	TRINITY_DN61325_c2_g4_i1	map00564
Glycerophospholipid metabolism	90	A2	ec:3.1.1.4	3	TRINITY_DN44941_c1_g1_i1, TRINITY_DN45446_c0_g1_i1, TRINITY_DN59876_c1_g1_i1	map00564
Glycerophospholipid metabolism	90	A1	ec:3.1.1.32	1	TRINITY_DN57970_c0_g2_i1	map00564
Glycerophospholipid metabolism	90	phosphatase	ec:3.1.3.4	12	TRINITY_DN56694_c5_g1_i1, TRINITY_DN45177_c3_g1_i1, TRINITY_DN59815_c1_g1_i1, TRINITY_DN47229_c1_g1_i1, TRINITY_DN41674_c0_g2_i1, TRINITY_DN50571_c0_g1_i1, TRINITY_DN50146_c2_g1_i1, TRINITY_DN59540_c2_g1_i1, TRINITY_DN58804_c1_g2_i1, TRINITY_DN56694_c6_g1_i1, TRINITY_DN64481_c1_g1_i1, TRINITY_DN56207_c3_g2_i1	map00564
Glycerophospholipid metabolism	90	N-methyltransferase	ec:2.1.1.71	1	TRINITY_DN49477_c0_g1_i1	map00564
Glycerophospholipid metabolism	90	dehydrogenase (NAD+)	ec:1.1.1.8	5	TRINITY_DN50495_c0_g1_i1, TRINITY_DN57048_c2_g2_i1, TRINITY_DN58750_c8_g2_i1, TRINITY_DN55877_c2_g1_i1, TRINITY_DN58750_c8_g1_i1	map00564
Glycerophospholipid metabolism	90	N-methyltransferase	ec:2.1.1.103	7	TRINITY_DN63666_c5_g1_i1, TRINITY_DN63666_c11_g1_i1, TRINITY_DN52558_c1_g1_i1, TRINITY_DN63666_c9_g1_i1, TRINITY_DN63666_c10_g2_i1, TRINITY_DN63666_c1_g1_i1, TRINITY_DN52558_c0_g1_i1	map00564
Glycerophospholipid metabolism	90	cytidylyltransferase	ec:2.7.7.41	2	TRINITY_DN49283_c1_g1_i1, TRINITY_DN64933_c6_g3_i1	map00564
Glycerophospholipid metabolism	90	3-phosphatidyltransferase	ec:2.7.8.11	2	TRINITY_DN56466_c5_g1_i1, TRINITY_DN56466_c5_g2_i1	map00564
Glycerophospholipid metabolism	90	dehydrogenase [NAD(P)+]	ec:1.1.1.94	5	TRINITY_DN50495_c0_g1_i1, TRINITY_DN57048_c2_g2_i1, TRINITY_DN58750_c8_g2_i1, TRINITY_DN55877_c2_g1_i1, TRINITY_DN58750_c8_g1_i1	map00564
Glycerophospholipid metabolism	90	cytidylyltransferase	ec:2.7.7.14	1	TRINITY_DN64408_c1_g2_i1	map00564
Glycerophospholipid metabolism	90	D	ec:3.1.4.4	14	TRINITY_DN55543_c0_g1_i1, TRINITY_DN62668_c3_g3_i1, TRINITY_DN63659_c1_g1_i1, TRINITY_DN64494_c3_g2_i1, TRINITY_DN64494_c3_g1_i1, TRINITY_DN64494_c1_g1_i1, TRINITY_DN51193_c2_g1_i1, TRINITY_DN40890_c1_g2_i1, TRINITY_DN64494_c0_g1_i1, TRINITY_DN64494_c2_g1_i1, TRINITY_DN40890_c1_g1_i1, TRINITY_DN51193_c1_g1_i1, TRINITY_DN60884_c0_g1_i1, TRINITY_DN52068_c0_g1_i1	map00564
Glycerophospholipid metabolism	90	dehydrogenase	ec:1.1.5.3	1	TRINITY_DN57893_c0_g1_i1	map00564
Synthesis and degradation of ketone bodies	4	synthase	ec:2.3.3.10	4	TRINITY_DN60661_c1_g1_i1, TRINITY_DN56246_c0_g1_i1, TRINITY_DN56246_c1_g2_i1, TRINITY_DN56246_c1_g1_i1	map00072
Glycosylphosphatidylinositol(GPI)-anchor biosynthesis	3	N-acetylglucosaminyltransferase	ec:2.4.1.198	3	TRINITY_DN50060_c0_g1_i1, TRINITY_DN54352_c0_g1_i1, TRINITY_DN59316_c6_g1_i1	map00563
Fatty acid degradation	24	ligase	ec:6.2.1.3	8	TRINITY_DN53169_c1_g1_i1, TRINITY_DN63804_c3_g1_i1, TRINITY_DN58694_c1_g1_i1, TRINITY_DN55173_c0_g1_i1, TRINITY_DN63804_c3_g2_i1, TRINITY_DN49254_c1_g1_i1, TRINITY_DN51451_c6_g3_i1, TRINITY_DN61134_c3_g1_i1	map00071
Fatty acid degradation	24	hydratase	ec:4.2.1.74	1	TRINITY_DN56052_c5_g1_i1	map00071
Fatty acid degradation	24	1-monooxygenase	ec:1.14.15.3	1	TRINITY_DN48590_c6_g1_i1	map00071
Fatty acid degradation	24	dehydrogenase	ec:1.1.1.1	1	TRINITY_DN47826_c0_g1_i1	map00071
Fatty acid degradation	24	hydratase	ec:4.2.1.17	1	TRINITY_DN50255_c0_g1_i1	map00071
Fatty acid degradation	24	dehydrogenase (NAD+)	ec:1.2.1.3	4	TRINITY_DN57151_c1_g1_i1, TRINITY_DN58156_c3_g1_i1, TRINITY_DN52174_c4_g1_i1, TRINITY_DN50807_c0_g1_i1	map00071
Fatty acid degradation	24	dehydrogenase	ec:1.1.1.35	3	TRINITY_DN61363_c1_g1_i1, TRINITY_DN50255_c0_g1_i1, TRINITY_DN56052_c5_g1_i1	map00071
Fatty acid degradation	24	oxidase	ec:1.3.3.6	7	TRINITY_DN47587_c3_g1_i1, TRINITY_DN64695_c1_g4_i1, TRINITY_DN51542_c14_g1_i1, TRINITY_DN47587_c4_g1_i1, TRINITY_DN47587_c2_g1_i1, TRINITY_DN47587_c0_g2_i1, TRINITY_DN47587_c0_g1_i1	map00071
Inositol phosphate metabolism	33	4-kinase	ec:2.7.1.67	2	TRINITY_DN63890_c1_g1_i1, TRINITY_DN56310_c0_g1_i1	map00562
Inositol phosphate metabolism	33	5-kinase	ec:2.7.1.68	3	TRINITY_DN64509_c3_g1_i1, TRINITY_DN59805_c3_g1_i1, TRINITY_DN61012_c0_g2_i1	map00562
Inositol phosphate metabolism	33	3-kinase	ec:2.7.1.64	1	TRINITY_DN53917_c2_g2_i1	map00562
Inositol phosphate metabolism	33	5-phosphatase	ec:3.1.3.36	5	TRINITY_DN61539_c2_g1_i1, TRINITY_DN55488_c1_g1_i1, TRINITY_DN63418_c1_g4_i1, TRINITY_DN46780_c2_g1_i1, TRINITY_DN63418_c1_g2_i1	map00562
Inositol phosphate metabolism	33	phospholipase C	ec:3.1.4.11	5	TRINITY_DN46490_c2_g1_i1, TRINITY_DN56218_c0_g3_i1, TRINITY_DN60220_c0_g1_i1, TRINITY_DN46731_c0_g1_i1, TRINITY_DN56447_c2_g1_i1	map00562
Inositol phosphate metabolism	33	phosphatase	ec:3.1.3.25	2	TRINITY_DN45455_c0_g1_i1, TRINITY_DN55756_c0_g1_i1	map00562
Inositol phosphate metabolism	33	dehydrogenase (acetylating)	ec:1.2.1.18	1	TRINITY_DN58156_c3_g1_i1	map00562
Inositol phosphate metabolism	33	1-kinase	ec:2.7.1.134	6	TRINITY_DN51431_c3_g1_i1, TRINITY_DN57547_c6_g1_i1, TRINITY_DN57449_c2_g2_i1, TRINITY_DN58120_c3_g1_i1, TRINITY_DN52222_c1_g1_i1, TRINITY_DN56215_c7_g1_i1	map00562
Inositol phosphate metabolism	33	2-kinase	ec:2.7.1.158	1	TRINITY_DN60394_c1_g1_i1	map00562
Inositol phosphate metabolism	33	5/6-kinase	ec:2.7.1.159	6	TRINITY_DN51431_c3_g1_i1, TRINITY_DN57547_c6_g1_i1, TRINITY_DN57449_c2_g2_i1, TRINITY_DN58120_c3_g1_i1, TRINITY_DN52222_c1_g1_i1, TRINITY_DN56215_c7_g1_i1	map00562
Inositol phosphate metabolism	33	isomerase	ec:5.3.1.1	3	TRINITY_DN50032_c3_g1_i1, TRINITY_DN49393_c0_g1_i1, TRINITY_DN44464_c0_g1_i1	map00562
Inositol phosphate metabolism	33	3-phosphatidyltransferase	ec:2.7.8.11	2	TRINITY_DN56466_c5_g1_i1, TRINITY_DN56466_c5_g2_i1	map00562
Inositol phosphate metabolism	33	synthase	ec:5.5.1.4	1	TRINITY_DN56035_c8_g1_i1	map00562
Inositol phosphate metabolism	33	oxygenase	ec:1.13.99.1	1	TRINITY_DN49946_c4_g1_i1	map00562
Benzoxazinoid biosynthesis	1	lyase	ec:4.1.2.8	1	TRINITY_DN45601_c2_g1_i1	map00402
Glycerolipid metabolism	67	kinase (ATP)	ec:2.7.1.107	14	TRINITY_DN59979_c0_g1_i1, TRINITY_DN60674_c0_g1_i1, TRINITY_DN59979_c0_g2_i1, TRINITY_DN56770_c7_g2_i1, TRINITY_DN59979_c1_g1_i1, TRINITY_DN46112_c0_g1_i1, TRINITY_DN54873_c1_g1_i1, TRINITY_DN64405_c1_g2_i1, TRINITY_DN54873_c2_g1_i1, TRINITY_DN59485_c5_g1_i1, TRINITY_DN59485_c2_g1_i1, TRINITY_DN56770_c7_g1_i1, TRINITY_DN54873_c3_g1_i1, TRINITY_DN61819_c3_g1_i1	map00561
Glycerolipid metabolism	67	kinase	ec:2.7.1.30	7	TRINITY_DN65204_c0_g5_i1, TRINITY_DN65204_c0_g6_i1, TRINITY_DN65204_c0_g4_i1, TRINITY_DN65204_c0_g1_i1, TRINITY_DN65204_c0_g2_i1, TRINITY_DN65204_c0_g3_i1, TRINITY_DN65089_c6_g5_i1	map00561
Glycerolipid metabolism	67	1-O-acyltransferase	ec:2.3.1.15	1	TRINITY_DN61325_c2_g4_i1	map00561
Glycerolipid metabolism	67	lipase	ec:3.1.1.23	16	TRINITY_DN45713_c1_g1_i1, TRINITY_DN55795_c2_g2_i1, TRINITY_DN65745_c0_g1_i1, TRINITY_DN55795_c2_g1_i1, TRINITY_DN45868_c0_g1_i1, TRINITY_DN37856_c1_g1_i1, TRINITY_DN46637_c2_g1_i1, TRINITY_DN55795_c0_g1_i1, TRINITY_DN43610_c1_g1_i1, TRINITY_DN43610_c2_g1_i1, TRINITY_DN47977_c1_g2_i1, TRINITY_DN64621_c0_g1_i1, TRINITY_DN64621_c1_g1_i1, TRINITY_DN64621_c1_g3_i1, TRINITY_DN46637_c0_g2_i1, TRINITY_D…	map00561
Glycerolipid metabolism	67	O-acyltransferase	ec:2.3.1.20	3	TRINITY_DN52429_c0_g1_i1, TRINITY_DN46128_c6_g1_i1, TRINITY_DN60563_c2_g1_i1	map00561
Glycerolipid metabolism	67	galactolipid lipase	ec:3.1.1.26	1	TRINITY_DN61837_c2_g2_i1	map00561
Glycerolipid metabolism	67	lipase	ec:3.1.1.3	4	TRINITY_DN62021_c6_g2_i1, TRINITY_DN50320_c2_g1_i1, TRINITY_DN47596_c0_g1_i1, TRINITY_DN51631_c1_g1_i1	map00561
Glycerolipid metabolism	67	phosphatase	ec:3.1.3.4	12	TRINITY_DN56694_c5_g1_i1, TRINITY_DN45177_c3_g1_i1, TRINITY_DN59815_c1_g1_i1, TRINITY_DN47229_c1_g1_i1, TRINITY_DN41674_c0_g2_i1, TRINITY_DN50571_c0_g1_i1, TRINITY_DN50146_c2_g1_i1, TRINITY_DN59540_c2_g1_i1, TRINITY_DN58804_c1_g2_i1, TRINITY_DN56694_c6_g1_i1, TRINITY_DN64481_c1_g1_i1, TRINITY_DN56207_c3_g2_i1	map00561
Glycerolipid metabolism	67	dehydrogenase (NADP+)	ec:1.1.1.2	1	TRINITY_DN60889_c0_g1_i1	map00561
Glycerolipid metabolism	67	dehydrogenase (NAD+)	ec:1.2.1.3	4	TRINITY_DN57151_c1_g1_i1, TRINITY_DN58156_c3_g1_i1, TRINITY_DN52174_c4_g1_i1, TRINITY_DN50807_c0_g1_i1	map00561
Glycerolipid metabolism	67	melibiase	ec:3.2.1.22	2	TRINITY_DN46160_c0_g2_i1, TRINITY_DN49309_c1_g1_i1	map00561
Glycerolipid metabolism	67	reductase	ec:1.1.1.21	1	TRINITY_DN60889_c0_g1_i1	map00561
Glycerolipid metabolism	67	synthase	ec:2.4.1.46	2	TRINITY_DN41531_c0_g1_i1, TRINITY_DN51009_c2_g1_i1	map00561
Phenylalanine, tyrosine and tryptophan biosynthesis	26	synthase	ec:4.1.1.48	4	TRINITY_DN44676_c3_g2_i1, TRINITY_DN59869_c2_g2_i1, TRINITY_DN63781_c4_g3_i1, TRINITY_DN57187_c1_g1_i1	map00400
Phenylalanine, tyrosine and tryptophan biosynthesis	26	kinase	ec:2.7.1.71	3	TRINITY_DN51778_c3_g1_i1, TRINITY_DN49999_c3_g1_i1, TRINITY_DN58740_c0_g1_i1	map00400
Phenylalanine, tyrosine and tryptophan biosynthesis	26	synthase	ec:4.2.3.5	1	TRINITY_DN44987_c0_g1_i1	map00400
Phenylalanine, tyrosine and tryptophan biosynthesis	26	dehydrogenase	ec:1.1.1.282	2	TRINITY_DN59564_c1_g2_i1, TRINITY_DN55829_c1_g1_i1	map00400
Phenylalanine, tyrosine and tryptophan biosynthesis	26	mutase	ec:5.4.99.5	3	TRINITY_DN49912_c0_g1_i1, TRINITY_DN55409_c4_g1_i1, TRINITY_DN52326_c1_g1_i1	map00400
Phenylalanine, tyrosine and tryptophan biosynthesis	26	synthase	ec:4.2.1.20	6	TRINITY_DN53944_c2_g2_i1, TRINITY_DN37447_c0_g1_i1, TRINITY_DN45601_c2_g1_i1, TRINITY_DN56937_c3_g1_i1, TRINITY_DN59376_c4_g1_i1, TRINITY_DN51322_c3_g1_i1	map00400
Phenylalanine, tyrosine and tryptophan biosynthesis	26	transaminase	ec:2.6.1.9	2	TRINITY_DN53959_c1_g1_i1, TRINITY_DN64808_c0_g1_i1	map00400
Phenylalanine, tyrosine and tryptophan biosynthesis	26	dehydratase	ec:4.2.1.10	2	TRINITY_DN59564_c1_g2_i1, TRINITY_DN55829_c1_g1_i1	map00400
Phenylalanine, tyrosine and tryptophan biosynthesis	26	synthase	ec:2.5.1.54	5	TRINITY_DN47803_c0_g1_i1, TRINITY_DN57376_c2_g4_i1, TRINITY_DN57376_c2_g2_i1, TRINITY_DN47803_c1_g1_i1, TRINITY_DN57376_c0_g1_i1	map00400
Phenylalanine, tyrosine and tryptophan biosynthesis	26	dehydrogenase	ec:1.1.1.25	2	TRINITY_DN59564_c1_g2_i1, TRINITY_DN55829_c1_g1_i1	map00400
Phenylalanine, tyrosine and tryptophan biosynthesis	26	isomerase	ec:5.3.1.24	4	TRINITY_DN44676_c3_g2_i1, TRINITY_DN59869_c2_g2_i1, TRINITY_DN63781_c4_g3_i1, TRINITY_DN57187_c1_g1_i1	map00400
Cyanoamino acid metabolism	25	N-monooxygenase	ec:1.14.13.41	1	TRINITY_DN61573_c0_g1_i1	map00460
Cyanoamino acid metabolism	25	hydroxymethyltransferase	ec:2.1.2.1	3	TRINITY_DN56893_c0_g1_i1, TRINITY_DN46831_c1_g1_i1, TRINITY_DN45979_c0_g1_i1	map00460
Cyanoamino acid metabolism	25	glutamyl transpeptidase	ec:2.3.2.2	2	TRINITY_DN59740_c0_g1_i1, TRINITY_DN58310_c1_g1_i1	map00460
Cyanoamino acid metabolism	25	gentiobiase	ec:3.2.1.21	17	TRINITY_DN56074_c0_g2_i1, TRINITY_DN3889_c0_g1_i1, TRINITY_DN41493_c0_g1_i1, TRINITY_DN50163_c8_g3_i1, TRINITY_DN56074_c0_g1_i1, TRINITY_DN50163_c7_g1_i1, TRINITY_DN46559_c0_g1_i1, TRINITY_DN52367_c0_g1_i1, TRINITY_DN53674_c5_g2_i1, TRINITY_DN5754_c0_g1_i1, TRINITY_DN6553_c0_g2_i1, TRINITY_DN49445_c4_g1_i1, TRINITY_DN45477_c2_g3_i1, TRINITY_DN51352_c1_g1_i1, TRINITY_DN6553_c0_g1_i1, TRINITY_DN454…	map00460
Cyanoamino acid metabolism	25	asparaginase II	ec:3.5.1.1	2	TRINITY_DN42277_c1_g2_i1, TRINITY_DN52972_c0_g1_i1	map00460
Isoquinoline alkaloid biosynthesis	25	oxidase	ec:1.10.3.1	8	TRINITY_DN41917_c2_g1_i1, TRINITY_DN39159_c5_g1_i1, TRINITY_DN39159_c4_g2_i1, TRINITY_DN41917_c1_g1_i1, TRINITY_DN41917_c0_g2_i1, TRINITY_DN41917_c0_g1_i1, TRINITY_DN55949_c0_g1_i1, TRINITY_DN55949_c0_g2_i1	map00950
Isoquinoline alkaloid biosynthesis	25	oxidase	ec:1.4.3.21	17	TRINITY_DN63307_c2_g1_i1, TRINITY_DN63307_c6_g4_i1, TRINITY_DN63307_c1_g1_i1, TRINITY_DN63307_c6_g6_i1, TRINITY_DN63307_c6_g3_i1, TRINITY_DN58046_c2_g1_i1, TRINITY_DN58046_c2_g2_i1, TRINITY_DN63307_c6_g5_i1, TRINITY_DN63307_c5_g1_i1, TRINITY_DN53859_c4_g2_i1, TRINITY_DN51803_c2_g1_i1, TRINITY_DN53859_c4_g1_i1, TRINITY_DN63307_c6_g2_i1, TRINITY_DN63307_c6_g1_i1, TRINITY_DN55298_c0_g1_i1, TRINITY_D…	map00950
Lysine biosynthesis	7	decarboxylase	ec:4.1.1.20	2	TRINITY_DN60542_c1_g1_i1, TRINITY_DN63839_c0_g1_i1	map00300
Lysine biosynthesis	7	aminotransferase	ec:2.6.1.83	1	TRINITY_DN60126_c3_g1_i1	map00300
Lysine biosynthesis	7	epimerase	ec:5.1.1.7	1	TRINITY_DN53544_c4_g1_i1	map00300
Lysine biosynthesis	7	reductase	ec:1.17.1.8	3	TRINITY_DN48881_c0_g1_i1, TRINITY_DN52650_c0_g1_i1, TRINITY_DN59715_c0_g1_i1	map00300
Phenylalanine metabolism	37	4-monooxygenase	ec:1.14.13.11	2	TRINITY_DN52051_c9_g2_i1, TRINITY_DN52051_c2_g1_i1	map00360
Phenylalanine metabolism	37	ligase	ec:6.2.1.12	1	TRINITY_DN54217_c4_g1_i1	map00360
Phenylalanine metabolism	37	transaminase	ec:2.6.1.9	2	TRINITY_DN53959_c1_g1_i1, TRINITY_DN64808_c0_g1_i1	map00360
Phenylalanine metabolism	37	ammonia-lyase	ec:4.3.1.24	12	TRINITY_DN62897_c3_g1_i1, TRINITY_DN47581_c2_g2_i1, TRINITY_DN47581_c3_g1_i1, TRINITY_DN47581_c2_g1_i1, TRINITY_DN47581_c6_g1_i1, TRINITY_DN56021_c1_g1_i1, TRINITY_DN47581_c1_g1_i1, TRINITY_DN4533_c0_g1_i1, TRINITY_DN4533_c0_g2_i1, TRINITY_DN47581_c4_g2_i1, TRINITY_DN62897_c1_g1_i1, TRINITY_DN56021_c5_g1_i1	map00360
Phenylalanine metabolism	37	ammonia-lyase	ec:4.3.1.25	12	TRINITY_DN62897_c3_g1_i1, TRINITY_DN47581_c2_g2_i1, TRINITY_DN47581_c3_g1_i1, TRINITY_DN47581_c2_g1_i1, TRINITY_DN47581_c6_g1_i1, TRINITY_DN56021_c1_g1_i1, TRINITY_DN47581_c1_g1_i1, TRINITY_DN4533_c0_g1_i1, TRINITY_DN4533_c0_g2_i1, TRINITY_DN47581_c4_g2_i1, TRINITY_DN62897_c1_g1_i1, TRINITY_DN56021_c5_g1_i1	map00360
Phenylalanine metabolism	37	hydratase	ec:4.2.1.17	1	TRINITY_DN50255_c0_g1_i1	map00360
Phenylalanine metabolism	37	dehydrogenase [NAD(P)+]	ec:1.2.1.5	2	TRINITY_DN57151_c1_g1_i1, TRINITY_DN52174_c4_g1_i1	map00360
Phenylalanine metabolism	37	oxidase	ec:1.4.3.21	17	TRINITY_DN63307_c2_g1_i1, TRINITY_DN63307_c6_g4_i1, TRINITY_DN63307_c1_g1_i1, TRINITY_DN63307_c6_g6_i1, TRINITY_DN63307_c6_g3_i1, TRINITY_DN58046_c2_g1_i1, TRINITY_DN58046_c2_g2_i1, TRINITY_DN63307_c6_g5_i1, TRINITY_DN63307_c5_g1_i1, TRINITY_DN53859_c4_g2_i1, TRINITY_DN51803_c2_g1_i1, TRINITY_DN53859_c4_g1_i1, TRINITY_DN63307_c6_g2_i1, TRINITY_DN63307_c6_g1_i1, TRINITY_DN55298_c0_g1_i1, TRINITY_D…	map00360
T cell receptor signaling pathway	153	phosphatase	ec:3.1.3.16	153	TRINITY_DN46117_c1_g1_i1, TRINITY_DN58884_c1_g1_i1, TRINITY_DN65439_c4_g1_i1, TRINITY_DN60344_c1_g1_i1, TRINITY_DN61539_c2_g1_i1, TRINITY_DN64526_c3_g1_i1, TRINITY_DN56533_c1_g4_i1, TRINITY_DN51659_c0_g1_i1, TRINITY_DN56437_c4_g5_i1, TRINITY_DN59111_c2_g1_i1, TRINITY_DN62180_c2_g1_i1, TRINITY_DN62014_c3_g1_i1, TRINITY_DN55988_c1_g1_i1, TRINITY_DN64842_c2_g1_i1, TRINITY_DN54768_c1_g1_i1, TRINITY_D…	map04660
Monobactam biosynthesis	6	adenylyltransferase	ec:2.7.7.4	3	TRINITY_DN58337_c3_g1_i1, TRINITY_DN58337_c3_g2_i1, TRINITY_DN37475_c0_g3_i1	map00261
Monobactam biosynthesis	6	reductase	ec:1.17.1.8	3	TRINITY_DN48881_c0_g1_i1, TRINITY_DN52650_c0_g1_i1, TRINITY_DN59715_c0_g1_i1	map00261
Glycine, serine and threonine metabolism	49	hydroxymethyltransferase	ec:2.1.2.1	3	TRINITY_DN56893_c0_g1_i1, TRINITY_DN46831_c1_g1_i1, TRINITY_DN45979_c0_g1_i1	map00260
Glycine, serine and threonine metabolism	49	transaminase	ec:2.6.1.52	1	TRINITY_DN54922_c0_g1_i1	map00260
Glycine, serine and threonine metabolism	49	racemase	ec:5.1.1.10	3	TRINITY_DN54661_c2_g1_i1, TRINITY_DN53544_c4_g1_i1, TRINITY_DN59581_c3_g1_i1	map00260
Glycine, serine and threonine metabolism	49	dehydrogenase (aminomethyl-transferring)	ec:1.4.4.2	1	TRINITY_DN61790_c4_g2_i1	map00260
Glycine, serine and threonine metabolism	49	synthase	ec:4.2.3.1	4	TRINITY_DN60102_c2_g2_i1, TRINITY_DN60102_c2_g1_i1, TRINITY_DN60102_c1_g1_i1, TRINITY_DN60102_c0_g1_i1	map00260
Glycine, serine and threonine metabolism	49	aldolase	ec:4.1.2.5	2	TRINITY_DN54775_c2_g3_i1, TRINITY_DN54694_c7_g1_i1	map00260
Glycine, serine and threonine metabolism	49	dehydrogenase	ec:1.8.1.4	3	TRINITY_DN52639_c1_g1_i1, TRINITY_DN54423_c0_g2_i1, TRINITY_DN62095_c1_g1_i1	map00260
Glycine, serine and threonine metabolism	49	dehydrogenase	ec:1.1.1.1	1	TRINITY_DN47826_c0_g1_i1	map00260
Glycine, serine and threonine metabolism	49	synthase	ec:4.2.1.20	6	TRINITY_DN53944_c2_g2_i1, TRINITY_DN37447_c0_g1_i1, TRINITY_DN45601_c2_g1_i1, TRINITY_DN56937_c3_g1_i1, TRINITY_DN59376_c4_g1_i1, TRINITY_DN51322_c3_g1_i1	map00260
Glycine, serine and threonine metabolism	49	dehydrogenase	ec:1.1.1.95	4	TRINITY_DN53959_c1_g1_i1, TRINITY_DN51642_c2_g1_i1, TRINITY_DN52165_c1_g3_i1, TRINITY_DN6183_c0_g1_i1	map00260
Glycine, serine and threonine metabolism	49	ammonia-lyase	ec:4.3.1.17	1	TRINITY_DN54661_c2_g1_i1	map00260
Glycine, serine and threonine metabolism	49	ammonia-lyase	ec:4.3.1.18	1	TRINITY_DN54661_c2_g1_i1	map00260
Glycine, serine and threonine metabolism	49	ammonia-lyase	ec:4.3.1.19	1	TRINITY_DN47697_c0_g2_i1	map00260
Glycine, serine and threonine metabolism	49	reductase	ec:1.1.1.81	3	TRINITY_DN57444_c0_g1_i1, TRINITY_DN44549_c5_g1_i1, TRINITY_DN51070_c0_g1_i1	map00260
Glycine, serine and threonine metabolism	49	oxidase	ec:1.4.3.21	17	TRINITY_DN63307_c2_g1_i1, TRINITY_DN63307_c6_g4_i1, TRINITY_DN63307_c1_g1_i1, TRINITY_DN63307_c6_g6_i1, TRINITY_DN63307_c6_g3_i1, TRINITY_DN58046_c2_g1_i1, TRINITY_DN58046_c2_g2_i1, TRINITY_DN63307_c6_g5_i1, TRINITY_DN63307_c5_g1_i1, TRINITY_DN53859_c4_g2_i1, TRINITY_DN51803_c2_g1_i1, TRINITY_DN53859_c4_g1_i1, TRINITY_DN63307_c6_g2_i1, TRINITY_DN63307_c6_g1_i1, TRINITY_DN55298_c0_g1_i1, TRINITY_D…	map00260
Steroid biosynthesis	11	reductase	ec:1.3.1.70	1	TRINITY_DN47416_c0_g1_i1	map00100
Steroid biosynthesis	11	synthase	ec:2.5.1.21	1	TRINITY_DN63280_c2_g1_i1	map00100
Steroid biosynthesis	11	Delta-isomerase	ec:5.3.3.5	3	TRINITY_DN39076_c0_g1_i1, TRINITY_DN48382_c0_g1_i1, TRINITY_DN39585_c1_g1_i1	map00100
Steroid biosynthesis	11	14alpha-demethylase	ec:1.14.13.70	6	TRINITY_DN54271_c0_g1_i1, TRINITY_DN37150_c2_g1_i1, TRINITY_DN37150_c0_g1_i1, TRINITY_DN38417_c0_g1_i1, TRINITY_DN37150_c1_g1_i1, TRINITY_DN47614_c0_g1_i1	map00100
Vitamin B6 metabolism	21	5'-phosphate synthase	ec:1.4.3.5	4	TRINITY_DN56093_c1_g1_i1, TRINITY_DN67046_c0_g1_i1, TRINITY_DN57463_c5_g1_i1, TRINITY_DN56490_c6_g1_i1	map00750
Vitamin B6 metabolism	21	transaminase	ec:2.6.1.52	1	TRINITY_DN54922_c0_g1_i1	map00750
Vitamin B6 metabolism	21	kinase	ec:2.7.1.35	1	TRINITY_DN57642_c9_g1_i1	map00750
Vitamin B6 metabolism	21	synthase	ec:4.2.3.1	4	TRINITY_DN60102_c2_g2_i1, TRINITY_DN60102_c2_g1_i1, TRINITY_DN60102_c1_g1_i1, TRINITY_DN60102_c0_g1_i1	map00750
Vitamin B6 metabolism	21	oxidase	ec:1.2.3.1	11	TRINITY_DN44040_c2_g1_i1, TRINITY_DN65607_c2_g4_i1, TRINITY_DN43565_c1_g1_i1, TRINITY_DN9832_c0_g1_i1, TRINITY_DN44040_c1_g1_i1, TRINITY_DN7612_c0_g1_i1, TRINITY_DN44040_c0_g2_i1, TRINITY_DN65607_c2_g1_i1, TRINITY_DN65607_c2_g2_i1, TRINITY_DN65607_c2_g3_i1, TRINITY_DN44040_c0_g1_i1	map00750
Phosphatidylinositol signaling system	42	kinase (ATP)	ec:2.7.1.107	14	TRINITY_DN59979_c0_g1_i1, TRINITY_DN60674_c0_g1_i1, TRINITY_DN59979_c0_g2_i1, TRINITY_DN56770_c7_g2_i1, TRINITY_DN59979_c1_g1_i1, TRINITY_DN46112_c0_g1_i1, TRINITY_DN54873_c1_g1_i1, TRINITY_DN64405_c1_g2_i1, TRINITY_DN54873_c2_g1_i1, TRINITY_DN59485_c5_g1_i1, TRINITY_DN59485_c2_g1_i1, TRINITY_DN56770_c7_g1_i1, TRINITY_DN54873_c3_g1_i1, TRINITY_DN61819_c3_g1_i1	map04070
Phosphatidylinositol signaling system	42	4-kinase	ec:2.7.1.67	2	TRINITY_DN63890_c1_g1_i1, TRINITY_DN56310_c0_g1_i1	map04070
Phosphatidylinositol signaling system	42	5-kinase	ec:2.7.1.68	3	TRINITY_DN64509_c3_g1_i1, TRINITY_DN59805_c3_g1_i1, TRINITY_DN61012_c0_g2_i1	map04070
Phosphatidylinositol signaling system	42	5-phosphatase	ec:3.1.3.36	5	TRINITY_DN61539_c2_g1_i1, TRINITY_DN55488_c1_g1_i1, TRINITY_DN63418_c1_g4_i1, TRINITY_DN46780_c2_g1_i1, TRINITY_DN63418_c1_g2_i1	map04070
Phosphatidylinositol signaling system	42	phospholipase C	ec:3.1.4.11	5	TRINITY_DN46490_c2_g1_i1, TRINITY_DN56218_c0_g3_i1, TRINITY_DN60220_c0_g1_i1, TRINITY_DN46731_c0_g1_i1, TRINITY_DN56447_c2_g1_i1	map04070
Phosphatidylinositol signaling system	42	phosphatase	ec:3.1.3.25	2	TRINITY_DN45455_c0_g1_i1, TRINITY_DN55756_c0_g1_i1	map04070
Phosphatidylinositol signaling system	42	2-kinase	ec:2.7.1.158	1	TRINITY_DN60394_c1_g1_i1	map04070
Phosphatidylinositol signaling system	42	5/6-kinase	ec:2.7.1.159	6	TRINITY_DN51431_c3_g1_i1, TRINITY_DN57547_c6_g1_i1, TRINITY_DN57449_c2_g2_i1, TRINITY_DN58120_c3_g1_i1, TRINITY_DN52222_c1_g1_i1, TRINITY_DN56215_c7_g1_i1	map04070
Phosphatidylinositol signaling system	42	cytidylyltransferase	ec:2.7.7.41	2	TRINITY_DN49283_c1_g1_i1, TRINITY_DN64933_c6_g3_i1	map04070
Phosphatidylinositol signaling system	42	3-phosphatidyltransferase	ec:2.7.8.11	2	TRINITY_DN56466_c5_g1_i1, TRINITY_DN56466_c5_g2_i1	map04070
Butanoate metabolism	28	synthase	ec:2.3.3.10	4	TRINITY_DN60661_c1_g1_i1, TRINITY_DN56246_c0_g1_i1, TRINITY_DN56246_c1_g2_i1, TRINITY_DN56246_c1_g1_i1	map00650
Butanoate metabolism	28	dehydrogenase	ec:1.3.5.1	9	TRINITY_DN56479_c0_g3_i1, TRINITY_DN56479_c0_g4_i1, TRINITY_DN56479_c0_g2_i1, TRINITY_DN56479_c0_g1_i1, TRINITY_DN9593_c0_g1_i1, TRINITY_DN56479_c0_g6_i1, TRINITY_DN60143_c0_g1_i1, TRINITY_DN56479_c0_g5_i1, TRINITY_DN52451_c6_g1_i1	map00650
Butanoate metabolism	28	dehydrogenase (NAD+)	ec:1.2.1.24	2	TRINITY_DN57151_c1_g1_i1, TRINITY_DN52174_c4_g1_i1	map00650
Butanoate metabolism	28	dehydrogenase [NAD(P)+]	ec:1.2.1.16	2	TRINITY_DN57151_c1_g1_i1, TRINITY_DN52174_c4_g1_i1	map00650
Butanoate metabolism	28	decarboxylase	ec:4.1.1.15	6	TRINITY_DN46881_c1_g1_i1, TRINITY_DN53632_c0_g1_i1, TRINITY_DN53632_c0_g2_i1, TRINITY_DN46881_c0_g1_i1, TRINITY_DN53632_c1_g1_i1, TRINITY_DN53632_c1_g2_i1	map00650
Butanoate metabolism	28	hydratase	ec:4.2.1.17	1	TRINITY_DN50255_c0_g1_i1	map00650
Butanoate metabolism	28	reductase	ec:1.1.1.36	2	TRINITY_DN46371_c0_g1_i1, TRINITY_DN41643_c0_g1_i1	map00650
Butanoate metabolism	28	dehydrogenase	ec:1.1.1.35	3	TRINITY_DN61363_c1_g1_i1, TRINITY_DN50255_c0_g1_i1, TRINITY_DN56052_c5_g1_i1	map00650
Butanoate metabolism	28	dehydrogenase	ec:1.1.99.2	2	TRINITY_DN64876_c3_g2_i1, TRINITY_DN64876_c3_g1_i1	map00650
Fatty acid elongation	3	hydratase	ec:4.2.1.74	1	TRINITY_DN56052_c5_g1_i1	map00062
Fatty acid elongation	3	hydratase	ec:4.2.1.17	1	TRINITY_DN50255_c0_g1_i1	map00062
Fatty acid elongation	3	dehydrogenase	ec:1.1.1.35	3	TRINITY_DN61363_c1_g1_i1, TRINITY_DN50255_c0_g1_i1, TRINITY_DN56052_c5_g1_i1	map00062
Fatty acid biosynthesis	10	ligase	ec:6.2.1.3	8	TRINITY_DN53169_c1_g1_i1, TRINITY_DN63804_c3_g1_i1, TRINITY_DN58694_c1_g1_i1, TRINITY_DN55173_c0_g1_i1, TRINITY_DN63804_c3_g2_i1, TRINITY_DN49254_c1_g1_i1, TRINITY_DN51451_c6_g3_i1, TRINITY_DN61134_c3_g1_i1	map00061
Fatty acid biosynthesis	10	9-desaturase	ec:1.14.19.2	2	TRINITY_DN49680_c1_g1_i1, TRINITY_DN51113_c0_g1_i1	map00061
Peptidoglycan biosynthesis	3	ligase	ec:6.3.2.4	1	TRINITY_DN63725_c3_g5_i1	map00550
Peptidoglycan biosynthesis	3	beta-N-acetylglucosaminyltransferase	ec:2.4.1.227	1	TRINITY_DN45789_c3_g1_i1	map00550
Peptidoglycan biosynthesis	3	MraY transferase	ec:2.7.8.13	1	TRINITY_DN60720_c2_g1_i1	map00550
Stilbenoid, diarylheptanoid and gingerol biosynthesis	2	4-monooxygenase	ec:1.14.13.11	2	TRINITY_DN52051_c9_g2_i1, TRINITY_DN52051_c2_g1_i1	map00945
Selenocompound metabolism	18	lyase	ec:4.4.1.16	3	TRINITY_DN53699_c3_g2_i1, TRINITY_DN53699_c5_g1_i1, TRINITY_DN64381_c2_g1_i1	map00450
Selenocompound metabolism	18	gamma-lyase	ec:4.4.1.11	1	TRINITY_DN57544_c10_g1_i1	map00450
Selenocompound metabolism	18	adenylyltransferase	ec:2.7.7.4	3	TRINITY_DN58337_c3_g1_i1, TRINITY_DN58337_c3_g2_i1, TRINITY_DN37475_c0_g3_i1	map00450
Selenocompound metabolism	18	reductase	ec:1.8.1.9	3	TRINITY_DN50579_c2_g1_i1, TRINITY_DN58280_c2_g2_i1, TRINITY_DN58280_c2_g1_i1	map00450
Selenocompound metabolism	18	S-methyltransferase	ec:2.1.1.12	2	TRINITY_DN63682_c2_g1_i1, TRINITY_DN63682_c3_g1_i1	map00450
Selenocompound metabolism	18	beta-lyase	ec:4.4.1.8	1	TRINITY_DN56068_c0_g1_i1	map00450
Selenocompound metabolism	18	ligase	ec:6.1.1.10	5	TRINITY_DN53166_c4_g2_i1, TRINITY_DN53166_c2_g1_i1, TRINITY_DN53166_c3_g1_i1, TRINITY_DN42971_c4_g1_i1, TRINITY_DN58124_c4_g1_i1	map00450
Flavonoid biosynthesis	14	synthase	ec:2.3.1.74	4	TRINITY_DN64223_c2_g4_i1, TRINITY_DN64223_c2_g3_i1, TRINITY_DN64223_c2_g2_i1, TRINITY_DN50208_c0_g1_i1	map00941
Flavonoid biosynthesis	14	4-monooxygenase	ec:1.14.13.11	2	TRINITY_DN52051_c9_g2_i1, TRINITY_DN52051_c2_g1_i1	map00941
Flavonoid biosynthesis	14	synthase	ec:1.14.11.23	2	TRINITY_DN52739_c4_g1_i1, TRINITY_DN52739_c3_g1_i1	map00941
Flavonoid biosynthesis	14	oxygenase	ec:1.14.11.19	1	TRINITY_DN53229_c0_g1_i1	map00941
Flavonoid biosynthesis	14	3-dioxygenase	ec:1.14.11.9	1	TRINITY_DN64821_c0_g1_i1	map00941
Flavonoid biosynthesis	14	isomerase	ec:5.5.1.6	4	TRINITY_DN63870_c0_g1_i1, TRINITY_DN53045_c3_g1_i1, TRINITY_DN44439_c0_g1_i1, TRINITY_DN57005_c1_g1_i1	map00941
Phenylpropanoid biosynthesis	237	dehydrogenase	ec:1.1.1.195	6	TRINITY_DN48317_c4_g3_i1, TRINITY_DN48317_c4_g2_i1, TRINITY_DN51498_c3_g1_i1, TRINITY_DN48317_c4_g1_i1, TRINITY_DN43285_c0_g1_i1, TRINITY_DN42539_c0_g1_i1	map00940
Phenylpropanoid biosynthesis	237	lactoperoxidase	ec:1.11.1.7	198	TRINITY_DN50216_c2_g1_i1, TRINITY_DN50989_c1_g4_i1, TRINITY_DN53677_c0_g1_i1, TRINITY_DN46170_c0_g1_i1, TRINITY_DN67130_c0_g1_i1, TRINITY_DN59558_c2_g1_i1, TRINITY_DN59654_c1_g1_i1, TRINITY_DN56723_c3_g1_i1, TRINITY_DN61068_c4_g1_i1, TRINITY_DN57930_c1_g1_i1, TRINITY_DN55509_c3_g1_i1, TRINITY_DN61066_c3_g1_i1, TRINITY_DN50347_c7_g1_i1, TRINITY_DN64754_c2_g1_i1, TRINITY_DN50690_c0_g1_i1, TRINITY_D…	map00940
Phenylpropanoid biosynthesis	237	reductase	ec:1.2.1.44	1	TRINITY_DN60398_c0_g1_i1	map00940
Phenylpropanoid biosynthesis	237	4-monooxygenase	ec:1.14.13.11	2	TRINITY_DN52051_c9_g2_i1, TRINITY_DN52051_c2_g1_i1	map00940
Phenylpropanoid biosynthesis	237	ligase	ec:6.2.1.12	1	TRINITY_DN54217_c4_g1_i1	map00940
Phenylpropanoid biosynthesis	237	ammonia-lyase	ec:4.3.1.24	12	TRINITY_DN62897_c3_g1_i1, TRINITY_DN47581_c2_g2_i1, TRINITY_DN47581_c3_g1_i1, TRINITY_DN47581_c2_g1_i1, TRINITY_DN47581_c6_g1_i1, TRINITY_DN56021_c1_g1_i1, TRINITY_DN47581_c1_g1_i1, TRINITY_DN4533_c0_g1_i1, TRINITY_DN4533_c0_g2_i1, TRINITY_DN47581_c4_g2_i1, TRINITY_DN62897_c1_g1_i1, TRINITY_DN56021_c5_g1_i1	map00940
Phenylpropanoid biosynthesis	237	ammonia-lyase	ec:4.3.1.25	12	TRINITY_DN62897_c3_g1_i1, TRINITY_DN47581_c2_g2_i1, TRINITY_DN47581_c3_g1_i1, TRINITY_DN47581_c2_g1_i1, TRINITY_DN47581_c6_g1_i1, TRINITY_DN56021_c1_g1_i1, TRINITY_DN47581_c1_g1_i1, TRINITY_DN4533_c0_g1_i1, TRINITY_DN4533_c0_g2_i1, TRINITY_DN47581_c4_g2_i1, TRINITY_DN62897_c1_g1_i1, TRINITY_DN56021_c5_g1_i1	map00940
Phenylpropanoid biosynthesis	237	gentiobiase	ec:3.2.1.21	17	TRINITY_DN56074_c0_g2_i1, TRINITY_DN3889_c0_g1_i1, TRINITY_DN41493_c0_g1_i1, TRINITY_DN50163_c8_g3_i1, TRINITY_DN56074_c0_g1_i1, TRINITY_DN50163_c7_g1_i1, TRINITY_DN46559_c0_g1_i1, TRINITY_DN52367_c0_g1_i1, TRINITY_DN53674_c5_g2_i1, TRINITY_DN5754_c0_g1_i1, TRINITY_DN6553_c0_g2_i1, TRINITY_DN49445_c4_g1_i1, TRINITY_DN45477_c2_g3_i1, TRINITY_DN51352_c1_g1_i1, TRINITY_DN6553_c0_g1_i1, TRINITY_DN454…	map00940
Tyrosine metabolism	44	beta-diketonase	ec:3.7.1.2	1	TRINITY_DN51943_c0_g1_i1	map00350
Tyrosine metabolism	44	1,2-dioxygenase	ec:1.13.11.5	1	TRINITY_DN59656_c1_g1_i1	map00350
Tyrosine metabolism	44	isomerase	ec:5.2.1.2	1	TRINITY_DN62422_c0_g3_i1	map00350
Tyrosine metabolism	44	dehydrogenase [NAD(P)+]	ec:1.2.1.16	2	TRINITY_DN57151_c1_g1_i1, TRINITY_DN52174_c4_g1_i1	map00350
Tyrosine metabolism	44	dehydrogenase	ec:1.1.1.1	1	TRINITY_DN47826_c0_g1_i1	map00350
Tyrosine metabolism	44	transaminase	ec:2.6.1.9	2	TRINITY_DN53959_c1_g1_i1, TRINITY_DN64808_c0_g1_i1	map00350
Tyrosine metabolism	44	dehydrogenase [NAD(P)+]	ec:1.2.1.5	2	TRINITY_DN57151_c1_g1_i1, TRINITY_DN52174_c4_g1_i1	map00350
Tyrosine metabolism	44	oxidase	ec:1.10.3.1	8	TRINITY_DN41917_c2_g1_i1, TRINITY_DN39159_c5_g1_i1, TRINITY_DN39159_c4_g2_i1, TRINITY_DN41917_c1_g1_i1, TRINITY_DN41917_c0_g2_i1, TRINITY_DN41917_c0_g1_i1, TRINITY_DN55949_c0_g1_i1, TRINITY_DN55949_c0_g2_i1	map00350
Tyrosine metabolism	44	oxidase	ec:1.2.3.1	11	TRINITY_DN44040_c2_g1_i1, TRINITY_DN65607_c2_g4_i1, TRINITY_DN43565_c1_g1_i1, TRINITY_DN9832_c0_g1_i1, TRINITY_DN44040_c1_g1_i1, TRINITY_DN7612_c0_g1_i1, TRINITY_DN44040_c0_g2_i1, TRINITY_DN65607_c2_g1_i1, TRINITY_DN65607_c2_g2_i1, TRINITY_DN65607_c2_g3_i1, TRINITY_DN44040_c0_g1_i1	map00350
Tyrosine metabolism	44	oxidase	ec:1.4.3.21	17	TRINITY_DN63307_c2_g1_i1, TRINITY_DN63307_c6_g4_i1, TRINITY_DN63307_c1_g1_i1, TRINITY_DN63307_c6_g6_i1, TRINITY_DN63307_c6_g3_i1, TRINITY_DN58046_c2_g1_i1, TRINITY_DN58046_c2_g2_i1, TRINITY_DN63307_c6_g5_i1, TRINITY_DN63307_c5_g1_i1, TRINITY_DN53859_c4_g2_i1, TRINITY_DN51803_c2_g1_i1, TRINITY_DN53859_c4_g1_i1, TRINITY_DN63307_c6_g2_i1, TRINITY_DN63307_c6_g1_i1, TRINITY_DN55298_c0_g1_i1, TRINITY_D…	map00350
Alanine, aspartate and glutamate metabolism	33	transaminase (isomerizing)	ec:2.6.1.16	1	TRINITY_DN58774_c2_g1_i1	map00250
Alanine, aspartate and glutamate metabolism	33	ligase	ec:6.3.1.2	6	TRINITY_DN48609_c4_g1_i1, TRINITY_DN48609_c4_g2_i1, TRINITY_DN45063_c0_g1_i1, TRINITY_DN46842_c4_g1_i1, TRINITY_DN61965_c4_g1_i1, TRINITY_DN48609_c3_g1_i1	map00250
Alanine, aspartate and glutamate metabolism	33	dehydrogenase (NAD+)	ec:1.2.1.24	2	TRINITY_DN57151_c1_g1_i1, TRINITY_DN52174_c4_g1_i1	map00250
Alanine, aspartate and glutamate metabolism	33	dehydrogenase [NAD(P)+]	ec:1.2.1.16	2	TRINITY_DN57151_c1_g1_i1, TRINITY_DN52174_c4_g1_i1	map00250
Alanine, aspartate and glutamate metabolism	33	decarboxylase	ec:4.1.1.15	6	TRINITY_DN46881_c1_g1_i1, TRINITY_DN53632_c0_g1_i1, TRINITY_DN53632_c0_g2_i1, TRINITY_DN46881_c0_g1_i1, TRINITY_DN53632_c1_g1_i1, TRINITY_DN53632_c1_g2_i1	map00250
Alanine, aspartate and glutamate metabolism	33	synthase (NADH)	ec:1.4.1.14	3	TRINITY_DN68253_c0_g1_i1, TRINITY_DN48245_c1_g1_i1, TRINITY_DN60481_c1_g1_i1	map00250
Alanine, aspartate and glutamate metabolism	33	synthase (glutamine-hydrolysing)	ec:6.3.5.4	6	TRINITY_DN44200_c0_g1_i1, TRINITY_DN54644_c3_g1_i1, TRINITY_DN51608_c1_g1_i1, TRINITY_DN54644_c5_g1_i1, TRINITY_DN56798_c4_g1_i1, TRINITY_DN64453_c1_g1_i1	map00250
Alanine, aspartate and glutamate metabolism	33	phosphoribosyldiphosphate 5-amidotransferase	ec:2.4.2.14	2	TRINITY_DN50059_c0_g1_i1, TRINITY_DN64842_c1_g1_i1	map00250
Alanine, aspartate and glutamate metabolism	33	dehydrogenase [NAD(P)+]	ec:1.4.1.3	2	TRINITY_DN57263_c4_g1_i1, TRINITY_DN56394_c2_g1_i1	map00250
Alanine, aspartate and glutamate metabolism	33	dehydrogenase	ec:1.4.1.2	1	TRINITY_DN57263_c4_g1_i1	map00250
Alanine, aspartate and glutamate metabolism	33	glutaminase I	ec:3.5.1.2	2	TRINITY_DN49682_c1_g1_i1, TRINITY_DN54228_c3_g1_i1	map00250
Alanine, aspartate and glutamate metabolism	33	asparaginase II	ec:3.5.1.1	2	TRINITY_DN42277_c1_g2_i1, TRINITY_DN52972_c0_g1_i1	map00250
Alanine, aspartate and glutamate metabolism	33	alpha-keto acid-omega-amidase	ec:3.5.1.3	1	TRINITY_DN53816_c2_g1_i1	map00250
Riboflavin metabolism	8	reductase	ec:1.1.1.193	1	TRINITY_DN56130_c2_g1_i1	map00740
Riboflavin metabolism	8	synthase	ec:4.1.99.12	3	TRINITY_DN60434_c2_g1_i1, TRINITY_DN51119_c3_g1_i1, TRINITY_DN54486_c1_g1_i1	map00740
Riboflavin metabolism	8	diphosphatase	ec:3.6.1.18	1	TRINITY_DN60369_c4_g3_i1	map00740
Riboflavin metabolism	8	synthase	ec:2.5.1.9	1	TRINITY_DN58203_c0_g1_i1	map00740
Riboflavin metabolism	8	deaminase	ec:3.5.4.26	2	TRINITY_DN59352_c3_g1_i1, TRINITY_DN56130_c2_g1_i1	map00740
Riboflavin metabolism	8	cyclohydrolase II	ec:3.5.4.25	4	TRINITY_DN60434_c2_g1_i1, TRINITY_DN51119_c3_g1_i1, TRINITY_DN54486_c1_g1_i1, TRINITY_DN52037_c1_g1_i1	map00740
Propanoate metabolism	9	dehydrogenase (CoA-acylating)	ec:1.2.1.27	1	TRINITY_DN58156_c3_g1_i1	map00640
Propanoate metabolism	9	decarboxylase	ec:4.1.1.9	1	TRINITY_DN57212_c0_g2_i1	map00640
Propanoate metabolism	9	ligase (ADP-forming)	ec:6.2.1.5	2	TRINITY_DN54712_c10_g1_i1, TRINITY_DN46133_c0_g1_i1	map00640
Propanoate metabolism	9	ligase (GDP-forming)	ec:6.2.1.4	2	TRINITY_DN54712_c10_g1_i1, TRINITY_DN46133_c0_g1_i1	map00640
Propanoate metabolism	9	(2-methylpropanoyl)transferase	ec:2.3.1.168	1	TRINITY_DN52110_c3_g1_i1	map00640
Propanoate metabolism	9	dehydrogenase (acetylating)	ec:1.2.1.18	1	TRINITY_DN58156_c3_g1_i1	map00640
Propanoate metabolism	9	dehydrogenase	ec:1.8.1.4	3	TRINITY_DN52639_c1_g1_i1, TRINITY_DN54423_c0_g2_i1, TRINITY_DN62095_c1_g1_i1	map00640
Propanoate metabolism	9	hydratase	ec:4.2.1.17	1	TRINITY_DN50255_c0_g1_i1	map00640
Ascorbate and aldarate metabolism	28	dehydrogenase (ascorbate)	ec:1.8.5.1	4	TRINITY_DN51287_c1_g1_i1, TRINITY_DN60858_c2_g1_i1, TRINITY_DN60858_c3_g1_i1, TRINITY_DN60860_c1_g5_i1	map00053
Ascorbate and aldarate metabolism	28	reductase (NADH)	ec:1.6.5.4	1	TRINITY_DN51475_c0_g1_i1	map00053
Ascorbate and aldarate metabolism	28	dehydrogenase (NAD+)	ec:1.2.1.3	4	TRINITY_DN57151_c1_g1_i1, TRINITY_DN58156_c3_g1_i1, TRINITY_DN52174_c4_g1_i1, TRINITY_DN50807_c0_g1_i1	map00053
Ascorbate and aldarate metabolism	28	6-dehydrogenase	ec:1.1.1.22	1	TRINITY_DN49428_c0_g1_i1	map00053
Ascorbate and aldarate metabolism	28	1-naphthol glucuronyltransferase	ec:2.4.1.17	17	TRINITY_DN54766_c3_g3_i1, TRINITY_DN55415_c1_g1_i1, TRINITY_DN51499_c1_g1_i1, TRINITY_DN50200_c2_g1_i1, TRINITY_DN61696_c1_g2_i1, TRINITY_DN52822_c6_g1_i1, TRINITY_DN49341_c0_g2_i1, TRINITY_DN58223_c3_g1_i1, TRINITY_DN54252_c2_g2_i1, TRINITY_DN61696_c1_g8_i1, TRINITY_DN40695_c0_g2_i1, TRINITY_DN62211_c2_g1_i1, TRINITY_DN52822_c1_g1_i1, TRINITY_DN62544_c0_g1_i1, TRINITY_DN52378_c0_g1_i1, TRINITY_D…	map00053
Ascorbate and aldarate metabolism	28	oxygenase	ec:1.13.99.1	1	TRINITY_DN49946_c4_g1_i1	map00053
Galactose metabolism	41	glucokinase (phosphorylating)	ec:2.7.1.2	7	TRINITY_DN57730_c1_g2_i1, TRINITY_DN55934_c5_g1_i1, TRINITY_DN56800_c0_g1_i1, TRINITY_DN58525_c4_g1_i1, TRINITY_DN60263_c1_g1_i1, TRINITY_DN58506_c0_g1_i1, TRINITY_DN62623_c2_g1_i1	map00052
Galactose metabolism	41	hexokinase type IV glucokinase	ec:2.7.1.1	10	TRINITY_DN57730_c1_g2_i1, TRINITY_DN55934_c5_g1_i1, TRINITY_DN56800_c0_g1_i1, TRINITY_DN56248_c2_g6_i1, TRINITY_DN58525_c4_g1_i1, TRINITY_DN60263_c1_g1_i1, TRINITY_DN58506_c0_g1_i1, TRINITY_DN47932_c0_g1_i1, TRINITY_DN57954_c1_g1_i1, TRINITY_DN62623_c2_g1_i1	map00052
Galactose metabolism	41	galactokinase (phosphorylating)	ec:2.7.1.6	2	TRINITY_DN60163_c6_g1_i1, TRINITY_DN55260_c1_g1_i1	map00052
Galactose metabolism	41	phosphohexokinase	ec:2.7.1.11	7	TRINITY_DN46753_c0_g1_i1, TRINITY_DN49487_c0_g2_i1, TRINITY_DN55050_c0_g1_i1, TRINITY_DN64395_c1_g1_i1, TRINITY_DN46488_c0_g2_i1, TRINITY_DN43087_c0_g1_i1, TRINITY_DN51479_c0_g1_i1	map00052
Galactose metabolism	41	3-alpha-galactosyltransferase	ec:2.4.1.123	2	TRINITY_DN55342_c1_g1_i1, TRINITY_DN55342_c2_g1_i1	map00052
Galactose metabolism	41	4-epimerase	ec:5.1.3.2	3	TRINITY_DN54634_c4_g1_i1, TRINITY_DN63118_c0_g1_i1, TRINITY_DN52526_c4_g1_i1	map00052
Galactose metabolism	41	uridylyltransferase	ec:2.7.7.12	1	TRINITY_DN55349_c4_g1_i1	map00052
Galactose metabolism	41	galactosyltransferase	ec:2.4.1.82	7	TRINITY_DN65012_c3_g1_i1, TRINITY_DN60186_c7_g2_i1, TRINITY_DN65012_c4_g1_i1, TRINITY_DN65012_c4_g2_i1, TRINITY_DN49309_c2_g1_i1, TRINITY_DN65209_c2_g1_i1, TRINITY_DN65209_c2_g2_i1	map00052
Galactose metabolism	41	(alpha-D-glucose-1,6-bisphosphate-dependent)	ec:5.4.2.2	2	TRINITY_DN48711_c0_g2_i1, TRINITY_DN46429_c0_g1_i1	map00052
Galactose metabolism	41	invertase	ec:3.2.1.26	4	TRINITY_DN62292_c1_g1_i1, TRINITY_DN51574_c3_g1_i1, TRINITY_DN52864_c4_g1_i1, TRINITY_DN52864_c4_g2_i1	map00052
Galactose metabolism	41	melibiase	ec:3.2.1.22	2	TRINITY_DN46160_c0_g2_i1, TRINITY_DN49309_c1_g1_i1	map00052
Galactose metabolism	41	reductase	ec:1.1.1.21	1	TRINITY_DN60889_c0_g1_i1	map00052
Fructose and mannose metabolism	61	1-phosphotransferase	ec:2.7.1.90	7	TRINITY_DN46753_c0_g1_i1, TRINITY_DN49487_c0_g2_i1, TRINITY_DN55050_c0_g1_i1, TRINITY_DN64395_c1_g1_i1, TRINITY_DN46488_c0_g2_i1, TRINITY_DN43087_c0_g1_i1, TRINITY_DN51479_c0_g1_i1	map00051
Fructose and mannose metabolism	61	aldolase	ec:4.1.2.13	12	TRINITY_DN42189_c0_g1_i1, TRINITY_DN59861_c4_g2_i1, TRINITY_DN57691_c1_g1_i1, TRINITY_DN57691_c0_g1_i1, TRINITY_DN43211_c0_g1_i1, TRINITY_DN54088_c1_g1_i1, TRINITY_DN37185_c0_g2_i1, TRINITY_DN47696_c0_g1_i1, TRINITY_DN37185_c0_g3_i1, TRINITY_DN57691_c2_g1_i1, TRINITY_DN37185_c0_g1_i1, TRINITY_DN57691_c0_g2_i1	map00051
Fructose and mannose metabolism	61	hexokinase type IV glucokinase	ec:2.7.1.1	10	TRINITY_DN57730_c1_g2_i1, TRINITY_DN55934_c5_g1_i1, TRINITY_DN56800_c0_g1_i1, TRINITY_DN56248_c2_g6_i1, TRINITY_DN58525_c4_g1_i1, TRINITY_DN60263_c1_g1_i1, TRINITY_DN58506_c0_g1_i1, TRINITY_DN47932_c0_g1_i1, TRINITY_DN57954_c1_g1_i1, TRINITY_DN62623_c2_g1_i1	map00051
Fructose and mannose metabolism	61	mannokinase (phosphorylating)	ec:2.7.1.7	7	TRINITY_DN57730_c1_g2_i1, TRINITY_DN55934_c5_g1_i1, TRINITY_DN56800_c0_g1_i1, TRINITY_DN58525_c4_g1_i1, TRINITY_DN60263_c1_g1_i1, TRINITY_DN58506_c0_g1_i1, TRINITY_DN62623_c2_g1_i1	map00051
Fructose and mannose metabolism	61	fructokinase (phosphorylating)	ec:2.7.1.4	10	TRINITY_DN57730_c1_g2_i1, TRINITY_DN55934_c5_g1_i1, TRINITY_DN56800_c0_g1_i1, TRINITY_DN56248_c2_g6_i1, TRINITY_DN58525_c4_g1_i1, TRINITY_DN60263_c1_g1_i1, TRINITY_DN58506_c0_g1_i1, TRINITY_DN47932_c0_g1_i1, TRINITY_DN57954_c1_g1_i1, TRINITY_DN62623_c2_g1_i1	map00051
Fructose and mannose metabolism	61	phosphohexokinase	ec:2.7.1.11	7	TRINITY_DN46753_c0_g1_i1, TRINITY_DN49487_c0_g2_i1, TRINITY_DN55050_c0_g1_i1, TRINITY_DN64395_c1_g1_i1, TRINITY_DN46488_c0_g2_i1, TRINITY_DN43087_c0_g1_i1, TRINITY_DN51479_c0_g1_i1	map00051
Fructose and mannose metabolism	61	hexose diphosphatase	ec:3.1.3.11	5	TRINITY_DN50661_c0_g1_i1, TRINITY_DN54223_c6_g2_i1, TRINITY_DN49443_c6_g1_i1, TRINITY_DN62612_c2_g1_i1, TRINITY_DN46850_c0_g1_i1	map00051
Fructose and mannose metabolism	61	diphosphatase	ec:3.6.1.21	1	TRINITY_DN58708_c0_g1_i1	map00051
Fructose and mannose metabolism	61	synthase	ec:1.1.1.271	1	TRINITY_DN51917_c0_g1_i1	map00051
Fructose and mannose metabolism	61	isomerase	ec:5.3.1.1	3	TRINITY_DN50032_c3_g1_i1, TRINITY_DN49393_c0_g1_i1, TRINITY_DN44464_c0_g1_i1	map00051
Fructose and mannose metabolism	61	isomerase	ec:5.3.1.8	6	TRINITY_DN57952_c7_g1_i1, TRINITY_DN57952_c7_g2_i1, TRINITY_DN57952_c1_g2_i1, TRINITY_DN57952_c1_g1_i1, TRINITY_DN50029_c0_g1_i1, TRINITY_DN57952_c5_g1_i1	map00051
Fructose and mannose metabolism	61	isomerase	ec:5.3.1.5	1	TRINITY_DN52010_c0_g1_i1	map00051
Fructose and mannose metabolism	61	isomerase	ec:5.3.1.6	3	TRINITY_DN43229_c0_g1_i1, TRINITY_DN52699_c1_g1_i1, TRINITY_DN52699_c1_g2_i1	map00051
Fructose and mannose metabolism	61	endo-1,4-beta-mannosidase	ec:3.2.1.78	8	TRINITY_DN57059_c4_g1_i1, TRINITY_DN68172_c0_g1_i1, TRINITY_DN57334_c1_g1_i1, TRINITY_DN58129_c2_g2_i1, TRINITY_DN56192_c1_g2_i1, TRINITY_DN56192_c1_g3_i1, TRINITY_DN56192_c1_g1_i1, TRINITY_DN52121_c0_g1_i1	map00051
Fructose and mannose metabolism	61	mannose phosphomutase	ec:5.4.2.8	3	TRINITY_DN47786_c4_g1_i1, TRINITY_DN63438_c3_g1_i1, TRINITY_DN57119_c9_g4_i1	map00051
Fructose and mannose metabolism	61	reductase	ec:1.1.1.21	1	TRINITY_DN60889_c0_g1_i1	map00051
Lipopolysaccharide biosynthesis	3	4'-kinase	ec:2.7.1.130	1	TRINITY_DN60539_c0_g1_i1	map00540
Lipopolysaccharide biosynthesis	3	synthase	ec:2.4.1.182	1	TRINITY_DN62901_c5_g1_i1	map00540
Lipopolysaccharide biosynthesis	3	O-acyltransferase	ec:2.3.1.129	1	TRINITY_DN58762_c4_g1_i1	map00540
Histidine metabolism	13	N-methyltransferase	ec:2.1.1.8	2	TRINITY_DN64578_c1_g1_i1, TRINITY_DN59074_c2_g1_i1	map00340
Histidine metabolism	13	diphosphatase	ec:3.6.1.31	3	TRINITY_DN48731_c2_g1_i1, TRINITY_DN48731_c3_g1_i1, TRINITY_DN62294_c0_g1_i1	map00340
Histidine metabolism	13	transaminase	ec:2.6.1.9	2	TRINITY_DN53959_c1_g1_i1, TRINITY_DN64808_c0_g1_i1	map00340
Histidine metabolism	13	dehydratase	ec:4.2.1.19	1	TRINITY_DN54171_c0_g1_i1	map00340
Histidine metabolism	13	dehydrogenase [NAD(P)+]	ec:1.2.1.5	2	TRINITY_DN57151_c1_g1_i1, TRINITY_DN52174_c4_g1_i1	map00340
Histidine metabolism	13	dehydrogenase (NAD+)	ec:1.2.1.3	4	TRINITY_DN57151_c1_g1_i1, TRINITY_DN58156_c3_g1_i1, TRINITY_DN52174_c4_g1_i1, TRINITY_DN50807_c0_g1_i1	map00340
Histidine metabolism	13	dehydrogenase	ec:1.1.1.23	1	TRINITY_DN51298_c0_g1_i1	map00340
Histidine metabolism	13	cyclohydrolase	ec:3.5.4.19	3	TRINITY_DN48731_c2_g1_i1, TRINITY_DN48731_c3_g1_i1, TRINITY_DN62294_c0_g1_i1	map00340
mTOR signaling pathway	16	protein kinase	ec:2.7.11.24	16	TRINITY_DN61003_c8_g2_i1, TRINITY_DN63178_c2_g1_i1, TRINITY_DN58378_c4_g1_i1, TRINITY_DN52679_c3_g1_i1, TRINITY_DN62713_c0_g1_i1, TRINITY_DN45527_c1_g1_i1, TRINITY_DN58378_c4_g2_i1, TRINITY_DN57474_c1_g1_i1, TRINITY_DN57291_c1_g1_i1, TRINITY_DN45527_c1_g2_i1, TRINITY_DN57570_c0_g1_i1, TRINITY_DN57291_c1_g2_i1, TRINITY_DN49290_c1_g1_i1, TRINITY_DN59737_c0_g1_i1, TRINITY_DN50515_c1_g2_i1, TRINITY_D…	map04150
Retinol metabolism	31	13,14-reductase	ec:1.3.99.23	1	TRINITY_DN61641_c2_g1_i1	map00830
Retinol metabolism	31	1-monooxygenase	ec:1.14.15.3	1	TRINITY_DN48590_c6_g1_i1	map00830
Retinol metabolism	31	dehydrogenase	ec:1.1.1.1	1	TRINITY_DN47826_c0_g1_i1	map00830
Retinol metabolism	31	oxidase	ec:1.2.3.1	11	TRINITY_DN44040_c2_g1_i1, TRINITY_DN65607_c2_g4_i1, TRINITY_DN43565_c1_g1_i1, TRINITY_DN9832_c0_g1_i1, TRINITY_DN44040_c1_g1_i1, TRINITY_DN7612_c0_g1_i1, TRINITY_DN44040_c0_g2_i1, TRINITY_DN65607_c2_g1_i1, TRINITY_DN65607_c2_g2_i1, TRINITY_DN65607_c2_g3_i1, TRINITY_DN44040_c0_g1_i1	map00830
Retinol metabolism	31	1-naphthol glucuronyltransferase	ec:2.4.1.17	17	TRINITY_DN54766_c3_g3_i1, TRINITY_DN55415_c1_g1_i1, TRINITY_DN51499_c1_g1_i1, TRINITY_DN50200_c2_g1_i1, TRINITY_DN61696_c1_g2_i1, TRINITY_DN52822_c6_g1_i1, TRINITY_DN49341_c0_g2_i1, TRINITY_DN58223_c3_g1_i1, TRINITY_DN54252_c2_g2_i1, TRINITY_DN61696_c1_g8_i1, TRINITY_DN40695_c0_g2_i1, TRINITY_DN62211_c2_g1_i1, TRINITY_DN52822_c1_g1_i1, TRINITY_DN62544_c0_g1_i1, TRINITY_DN52378_c0_g1_i1, TRINITY_D…	map00830
Steroid hormone biosynthesis	59	kinase	ec:2.7.4.6	7	TRINITY_DN55837_c0_g1_i1, TRINITY_DN50251_c2_g2_i1, TRINITY_DN47052_c1_g1_i1, TRINITY_DN43673_c0_g1_i1, TRINITY_DN52024_c3_g2_i1, TRINITY_DN52024_c3_g1_i1, TRINITY_DN52952_c0_g1_i1	map00240
Pyrimidine metabolism	59	carbamoylaspartic dehydrase	ec:3.5.2.3	2	TRINITY_DN64497_c1_g2_i1, TRINITY_DN64497_c1_g1_i1	map00240
Pyrimidine metabolism	59	kinase	ec:2.7.4.9	1	TRINITY_DN48827_c4_g1_i1	map00240
Pyrimidine metabolism	59	hydantoinase	ec:3.5.2.2	1	TRINITY_DN60538_c10_g1_i1	map00240
Pyrimidine metabolism	59	diphosphate phosphatase	ec:3.6.1.6	2	TRINITY_DN56880_c0_g2_i1, TRINITY_DN56880_c0_g1_i1	map00240
Pyrimidine metabolism	59	dehydrogenase (quinone)	ec:1.3.5.2	3	TRINITY_DN43730_c0_g1_i1, TRINITY_DN51540_c2_g2_i1, TRINITY_DN51540_c2_g1_i1	map00240
Pyrimidine metabolism	59	decarboxylase	ec:4.1.1.23	5	TRINITY_DN61891_c6_g1_i1, TRINITY_DN40757_c0_g1_i1, TRINITY_DN61891_c7_g1_i1, TRINITY_DN61891_c5_g1_i1, TRINITY_DN56993_c4_g1_i1	map00240
Pyrimidine metabolism	59	kinase	ec:2.7.1.48	8	TRINITY_DN47892_c1_g1_i1, TRINITY_DN53275_c1_g1_i1, TRINITY_DN64010_c5_g1_i1, TRINITY_DN55737_c2_g1_i1, TRINITY_DN59359_c3_g1_i1, TRINITY_DN57666_c4_g2_i1, TRINITY_DN63954_c4_g1_i1, TRINITY_DN55293_c1_g1_i1	map00240
Pyrimidine metabolism	59	deaminase	ec:3.5.4.5	1	TRINITY_DN47078_c0_g1_i1	map00240
Pyrimidine metabolism	59	reductase	ec:1.17.4.1	4	TRINITY_DN63259_c0_g1_i1, TRINITY_DN61117_c2_g1_i1, TRINITY_DN59118_c0_g1_i1, TRINITY_DN61117_c1_g2_i1	map00240
Pyrimidine metabolism	59	kinase	ec:2.7.1.21	1	TRINITY_DN54218_c1_g1_i1	map00240
Pyrimidine metabolism	59	diphosphatase	ec:3.6.1.19	2	TRINITY_DN56256_c0_g1_i1, TRINITY_DN62244_c6_g1_i1	map00240
Pyrimidine metabolism	59	diphosphatase	ec:3.6.1.23	1	TRINITY_DN56256_c0_g1_i1	map00240
Pyrimidine metabolism	59	RNA polymerase	ec:2.7.7.6	8	TRINITY_DN52892_c0_g2_i1, TRINITY_DN63783_c5_g5_i1, TRINITY_DN63783_c5_g3_i1, TRINITY_DN56224_c0_g1_i1, TRINITY_DN63783_c5_g4_i1, TRINITY_DN50061_c4_g1_i1, TRINITY_DN62307_c5_g1_i1, TRINITY_DN58995_c0_g1_i1	map00240
Pyrimidine metabolism	59	DNA polymerase	ec:2.7.7.7	1	TRINITY_DN65597_c0_g4_i1	map00240
Pyrimidine metabolism	59	nucleotidyltransferase	ec:2.7.7.8	2	TRINITY_DN60161_c0_g1_i1, TRINITY_DN59666_c3_g1_i1	map00240
Pyrimidine metabolism	59	reductase	ec:1.8.1.9	3	TRINITY_DN50579_c2_g1_i1, TRINITY_DN58280_c2_g2_i1, TRINITY_DN58280_c2_g1_i1	map00240
Pyrimidine metabolism	59	uridine 5'-nucleotidase	ec:3.1.3.5	2	TRINITY_DN56408_c3_g1_i1, TRINITY_DN59734_c0_g2_i1	map00240
Pyrimidine metabolism	59	dehydrogenase (NADP+)	ec:1.3.1.2	2	TRINITY_DN51540_c2_g2_i1, TRINITY_DN51540_c2_g1_i1	map00240
Pyrimidine metabolism	59	dehydrogenase (NAD+)	ec:1.3.1.1	1	TRINITY_DN56130_c2_g1_i1	map00240
Pyrimidine metabolism	59	phosphoribosyltransferase	ec:2.4.2.10	5	TRINITY_DN61891_c6_g1_i1, TRINITY_DN40757_c0_g1_i1, TRINITY_DN61891_c7_g1_i1, TRINITY_DN61891_c5_g1_i1, TRINITY_DN56993_c4_g1_i1	map00240
Pyrimidine metabolism	59	kinase	ec:2.7.4.22	2	TRINITY_DN53727_c2_g1_i1, TRINITY_DN52938_c2_g1_i1	map00240
Pyrimidine metabolism	59	phosphoribosyltransferase	ec:2.4.2.9	2	TRINITY_DN53275_c1_g1_i1, TRINITY_DN55293_c1_g1_i1	map00240
Pyrimidine metabolism	59	kinase	ec:2.7.4.14	3	TRINITY_DN51276_c0_g1_i1, TRINITY_DN50410_c0_g2_i1, TRINITY_DN49057_c5_g1_i1	map00240
Thiamine metabolism	535	kinase	ec:2.7.4.7	2	TRINITY_DN44829_c0_g2_i1, TRINITY_DN64978_c2_g2_i1	map00730
Thiamine metabolism	535	desulfurase	ec:2.8.1.7	3	TRINITY_DN53699_c3_g2_i1, TRINITY_DN53699_c5_g1_i1, TRINITY_DN57308_c1_g1_i1	map00730
Thiamine metabolism	535	kinase	ec:2.7.1.50	1	TRINITY_DN47946_c0_g1_i1	map00730
Thiamine metabolism	535	kinase	ec:2.7.1.49	2	TRINITY_DN44829_c0_g2_i1, TRINITY_DN64978_c2_g2_i1	map00730
Thiamine metabolism	535	synthase	ec:2.2.1.7	3	TRINITY_DN64788_c4_g1_i1, TRINITY_DN61518_c5_g1_i1, TRINITY_DN60585_c5_g1_i1	map00730
Thiamine metabolism	535	phosphatase	ec:3.6.1.15	523	TRINITY_DN50906_c8_g1_i1, TRINITY_DN65260_c2_g1_i1, TRINITY_DN65398_c1_g2_i1, TRINITY_DN47298_c0_g1_i1, TRINITY_DN58799_c3_g1_i1, TRINITY_DN42396_c0_g1_i1, TRINITY_DN63101_c2_g1_i1, TRINITY_DN39452_c2_g1_i1, TRINITY_DN46985_c2_g1_i1, TRINITY_DN51158_c4_g1_i1, TRINITY_DN49425_c0_g1_i1, TRINITY_DN39716_c0_g1_i1, TRINITY_DN49176_c12_g1_i1, TRINITY_DN53496_c1_g1_i1, TRINITY_DN65447_c3_g1_i1, TRINITY_…	map00730
Thiamine metabolism	535	diphosphokinase	ec:2.7.6.2	3	TRINITY_DN46476_c0_g1_i1, TRINITY_DN57254_c3_g1_i1, TRINITY_DN54926_c2_g1_i1	map00730
Thiamine metabolism	535	phosphate synthase	ec:2.5.1.3	2	TRINITY_DN44829_c0_g2_i1, TRINITY_DN64978_c2_g2_i1	map00730
Atrazine degradation	1	ec:3.5.1.5 urease	ec:3.5.1.5	1	TRINITY_DN63949_c4_g1_i1	map00791
Folate biosynthesis	11	aldolase	ec:4.1.2.25	1	TRINITY_DN52535_c4_g1_i1	map00790
Folate biosynthesis	11	hydrolase	ec:3.4.19.9	2	TRINITY_DN50532_c7_g1_i1, TRINITY_DN40729_c0_g1_i1	map00790
Folate biosynthesis	11	pyranopterin phosphate synthase	ec:4.1.99.18	1	TRINITY_DN53801_c2_g1_i1	map00790
Folate biosynthesis	11	synthase	ec:6.3.2.12	2	TRINITY_DN55152_c1_g1_i1, TRINITY_DN55152_c1_g2_i1	map00790
Folate biosynthesis	11	synthase	ec:6.3.2.17	4	TRINITY_DN58820_c0_g2_i1, TRINITY_DN45239_c4_g1_i1, TRINITY_DN55152_c1_g1_i1, TRINITY_DN55152_c1_g2_i1	map00790
Folate biosynthesis	11	synthase	ec:2.5.1.15	1	TRINITY_DN59554_c4_g1_i1	map00790
Folate biosynthesis	11	diphosphokinase	ec:2.7.6.3	1	TRINITY_DN59554_c4_g1_i1	map00790
Folate biosynthesis	11	synthase	ec:2.8.1.12	2	TRINITY_DN50638_c6_g2_i1, TRINITY_DN38259_c1_g1_i1	map00790
Steroid hormone biosynthesis	24	dehydrogenase	ec:1.1.1.145	7	TRINITY_DN45334_c5_g2_i1, TRINITY_DN65521_c1_g2_i1, TRINITY_DN56129_c2_g1_i1, TRINITY_DN51421_c3_g1_i1, TRINITY_DN42587_c0_g1_i1, TRINITY_DN65521_c1_g1_i1, TRINITY_DN45334_c4_g1_i1	map00140
Steroid hormone biosynthesis	24	1-naphthol glucuronyltransferase	ec:2.4.1.17	17	TRINITY_DN54766_c3_g3_i1, TRINITY_DN55415_c1_g1_i1, TRINITY_DN51499_c1_g1_i1, TRINITY_DN50200_c2_g1_i1, TRINITY_DN61696_c1_g2_i1, TRINITY_DN52822_c6_g1_i1, TRINITY_DN49341_c0_g2_i1, TRINITY_DN58223_c3_g1_i1, TRINITY_DN54252_c2_g2_i1, TRINITY_DN61696_c1_g8_i1, TRINITY_DN40695_c0_g2_i1, TRINITY_DN62211_c2_g1_i1, TRINITY_DN52822_c1_g1_i1, TRINITY_DN62544_c0_g1_i1, TRINITY_DN52378_c0_g1_i1, TRINITY_D…	map00140
Glyoxylate and dicarboxylate metabolism	80	hydroxymethyltransferase	ec:2.1.2.1	3	TRINITY_DN56893_c0_g1_i1, TRINITY_DN46831_c1_g1_i1, TRINITY_DN45979_c0_g1_i1	map00630
Glyoxylate and dicarboxylate metabolism	80	carboxylase	ec:4.1.1.39	5	TRINITY_DN62914_c5_g1_i1, TRINITY_DN69632_c0_g1_i1, TRINITY_DN54604_c2_g1_i1, TRINITY_DN47668_c0_g2_i1, TRINITY_DN44083_c0_g1_i1	map00630
Glyoxylate and dicarboxylate metabolism	80	ligase	ec:6.3.1.2	6	TRINITY_DN48609_c4_g1_i1, TRINITY_DN48609_c4_g2_i1, TRINITY_DN45063_c0_g1_i1, TRINITY_DN46842_c4_g1_i1, TRINITY_DN61965_c4_g1_i1, TRINITY_DN48609_c3_g1_i1	map00630
Glyoxylate and dicarboxylate metabolism	80	lyase	ec:4.1.3.1	1	TRINITY_DN45332_c0_g1_i1	map00630
Glyoxylate and dicarboxylate metabolism	80	equilase	ec:1.11.1.6	4	TRINITY_DN69219_c0_g1_i1, TRINITY_DN61666_c1_g1_i1, TRINITY_DN51271_c0_g1_i1, TRINITY_DN49272_c1_g1_i1	map00630
Glyoxylate and dicarboxylate metabolism	80	decarboxylase	ec:4.1.1.2	28	TRINITY_DN45634_c0_g1_i1, TRINITY_DN58732_c0_g1_i1, TRINITY_DN61150_c1_g2_i1, TRINITY_DN45607_c1_g1_i1, TRINITY_DN52524_c2_g1_i1, TRINITY_DN41173_c0_g1_i1, TRINITY_DN51164_c0_g1_i1, TRINITY_DN41434_c0_g2_i1, TRINITY_DN67148_c0_g1_i1, TRINITY_DN52524_c2_g3_i1, TRINITY_DN47314_c3_g1_i1, TRINITY_DN47314_c2_g2_i1, TRINITY_DN44693_c0_g1_i1, TRINITY_DN58732_c0_g2_i1, TRINITY_DN47339_c0_g1_i1, TRINITY_D…	map00630
Glyoxylate and dicarboxylate metabolism	80	ligase	ec:6.2.1.8	1	TRINITY_DN58363_c0_g1_i1	map00630
Glyoxylate and dicarboxylate metabolism	80	phosphatase	ec:3.1.3.18	1	TRINITY_DN57200_c1_g1_i1	map00630
Glyoxylate and dicarboxylate metabolism	80	synthase (ferredoxin)	ec:1.4.7.1	1	TRINITY_DN55433_c0_g1_i1	map00630
Glyoxylate and dicarboxylate metabolism	80	reductase (NADP+)	ec:1.1.1.79	4	TRINITY_DN57444_c0_g1_i1, TRINITY_DN47591_c1_g1_i1, TRINITY_DN44549_c5_g1_i1, TRINITY_DN51070_c0_g1_i1	map00630
Glyoxylate and dicarboxylate metabolism	80	deformylase	ec:3.5.1.10	1	TRINITY_DN57139_c4_g3_i1	map00630
Glyoxylate and dicarboxylate metabolism	80	reductase	ec:1.1.1.81	3	TRINITY_DN57444_c0_g1_i1, TRINITY_DN44549_c5_g1_i1, TRINITY_DN51070_c0_g1_i1	map00630
Glyoxylate and dicarboxylate metabolism	80	dehydrogenase	ec:1.2.1.2	2	TRINITY_DN53959_c1_g1_i1, TRINITY_DN6183_c0_g1_i1	map00630
Glyoxylate and dicarboxylate metabolism	80	dehydrogenase	ec:1.1.1.37	11	TRINITY_DN57405_c1_g1_i1, TRINITY_DN57923_c4_g1_i1, TRINITY_DN57405_c1_g2_i1, TRINITY_DN63686_c6_g1_i1, TRINITY_DN47042_c0_g1_i1, TRINITY_DN57405_c1_g3_i1, TRINITY_DN41712_c0_g1_i1, TRINITY_DN50197_c3_g3_i1, TRINITY_DN45225_c0_g1_i1, TRINITY_DN57405_c0_g1_i1, TRINITY_DN57923_c3_g1_i1	map00630
Glyoxylate and dicarboxylate metabolism	80	reductase	ec:1.1.1.36	2	TRINITY_DN46371_c0_g1_i1, TRINITY_DN41643_c0_g1_i1	map00630
Glyoxylate and dicarboxylate metabolism	80	synthase	ec:2.3.3.9	2	TRINITY_DN60755_c2_g1_i1, TRINITY_DN60755_c2_g2_i1	map00630
Glyoxylate and dicarboxylate metabolism	80	(Si)-synthase	ec:2.3.3.1	3	TRINITY_DN42882_c0_g1_i1, TRINITY_DN50789_c4_g2_i1, TRINITY_DN50789_c4_g1_i1	map00630
Glyoxylate and dicarboxylate metabolism	80	kynurenine formamidase	ec:3.5.1.9	5	TRINITY_DN58462_c6_g2_i1, TRINITY_DN58462_c6_g1_i1, TRINITY_DN58462_c6_g5_i1, TRINITY_DN51529_c2_g1_i1, TRINITY_DN43733_c2_g2_i1	map00630
Glycosaminoglycan biosynthesis - heparan sulfate / heparin	18	4-alpha-N-acetylglucosaminyltransferase	ec:2.4.1.223	1	TRINITY_DN64303_c9_g2_i1	map00534
Glycosaminoglycan biosynthesis - heparan sulfate / heparin	18	3-beta-galactosyltransferase	ec:2.4.1.134	1	TRINITY_DN62281_c4_g1_i1	map00534
Glycosaminoglycan biosynthesis - heparan sulfate / heparin	18	3-beta-glucuronosyltransferase	ec:2.4.1.135	15	TRINITY_DN54766_c3_g3_i1, TRINITY_DN55415_c1_g1_i1, TRINITY_DN50200_c2_g1_i1, TRINITY_DN61696_c1_g2_i1, TRINITY_DN52822_c6_g1_i1, TRINITY_DN49341_c0_g2_i1, TRINITY_DN58223_c3_g1_i1, TRINITY_DN54252_c2_g2_i1, TRINITY_DN61696_c1_g8_i1, TRINITY_DN62211_c2_g1_i1, TRINITY_DN52822_c1_g1_i1, TRINITY_DN62544_c0_g1_i1, TRINITY_DN52378_c0_g1_i1, TRINITY_DN61696_c1_g7_i1, TRINITY_DN54252_c2_g1_i1	map00534
Glycosaminoglycan biosynthesis - heparan sulfate / heparin	18	xylosyltransferase	ec:2.4.2.26	1	TRINITY_DN61373_c1_g2_i1	map00534
Glycosaminoglycan biosynthesis - chondroitin sulfate / dermatan sulfate	17	3-beta-galactosyltransferase	ec:2.4.1.134	1	TRINITY_DN62281_c4_g1_i1	map00532
Glycosaminoglycan biosynthesis - chondroitin sulfate / dermatan sulfate	17	3-beta-glucuronosyltransferase	ec:2.4.1.135	15	TRINITY_DN54766_c3_g3_i1, TRINITY_DN55415_c1_g1_i1, TRINITY_DN50200_c2_g1_i1, TRINITY_DN61696_c1_g2_i1, TRINITY_DN52822_c6_g1_i1, TRINITY_DN49341_c0_g2_i1, TRINITY_DN58223_c3_g1_i1, TRINITY_DN54252_c2_g2_i1, TRINITY_DN61696_c1_g8_i1, TRINITY_DN62211_c2_g1_i1, TRINITY_DN52822_c1_g1_i1, TRINITY_DN62544_c0_g1_i1, TRINITY_DN52378_c0_g1_i1, TRINITY_DN61696_c1_g7_i1, TRINITY_DN54252_c2_g1_i1	map00532
Glycosaminoglycan biosynthesis - chondroitin sulfate / dermatan sulfate	17	xylosyltransferase	ec:2.4.2.26	1	TRINITY_DN61373_c1_g2_i1	map00532
Pentose and glucuronate interconversions	96	lyase	ec:4.2.2.2	4	TRINITY_DN56977_c2_g3_i1, TRINITY_DN59542_c0_g2_i1, TRINITY_DN56977_c2_g2_i1, TRINITY_DN45985_c1_g1_i1	map00040
Pentose and glucuronate interconversions	96	xylulokinase (phosphorylating)	ec:2.7.1.17	7	TRINITY_DN52141_c0_g1_i1, TRINITY_DN50909_c0_g1_i1, TRINITY_DN50909_c0_g2_i1, TRINITY_DN65157_c3_g3_i1, TRINITY_DN50909_c0_g3_i1, TRINITY_DN65157_c3_g5_i1, TRINITY_DN57566_c1_g1_i1	map00040
Pentose and glucuronate interconversions	96	3-epimerase	ec:5.1.3.1	2	TRINITY_DN46612_c0_g1_i1, TRINITY_DN49448_c0_g1_i1	map00040
Pentose and glucuronate interconversions	96	pectin demethoxylase	ec:3.1.1.11	26	TRINITY_DN43261_c1_g1_i1, TRINITY_DN61818_c2_g1_i1, TRINITY_DN38142_c0_g1_i1, TRINITY_DN62027_c2_g2_i1, TRINITY_DN47169_c2_g1_i1, TRINITY_DN61947_c0_g1_i1, TRINITY_DN58894_c3_g1_i1, TRINITY_DN47169_c3_g2_i1, TRINITY_DN47169_c3_g4_i1, TRINITY_DN54901_c0_g1_i1, TRINITY_DN43287_c0_g1_i1, TRINITY_DN45581_c0_g1_i1, TRINITY_DN58894_c1_g1_i1, TRINITY_DN43261_c1_g2_i1, TRINITY_DN63306_c3_g1_i1, TRINITY_D…	map00040
Pentose and glucuronate interconversions	96	isomerase	ec:5.3.1.5	1	TRINITY_DN52010_c0_g1_i1	map00040
Pentose and glucuronate interconversions	96	dehydrogenase (NADP+)	ec:1.1.1.2	1	TRINITY_DN60889_c0_g1_i1	map00040
Pentose and glucuronate interconversions	96	dehydrogenase (NAD+)	ec:1.2.1.3	4	TRINITY_DN57151_c1_g1_i1, TRINITY_DN58156_c3_g1_i1, TRINITY_DN52174_c4_g1_i1, TRINITY_DN50807_c0_g1_i1	map00040
Pentose and glucuronate interconversions	96	6-dehydrogenase	ec:1.1.1.22	1	TRINITY_DN49428_c0_g1_i1	map00040
Pentose and glucuronate interconversions	96	reductase	ec:1.1.1.21	1	TRINITY_DN60889_c0_g1_i1	map00040
Pentose and glucuronate interconversions	96	1-naphthol glucuronyltransferase	ec:2.4.1.17	17	TRINITY_DN54766_c3_g3_i1, TRINITY_DN55415_c1_g1_i1, TRINITY_DN51499_c1_g1_i1, TRINITY_DN50200_c2_g1_i1, TRINITY_DN61696_c1_g2_i1, TRINITY_DN52822_c6_g1_i1, TRINITY_DN49341_c0_g2_i1, TRINITY_DN58223_c3_g1_i1, TRINITY_DN54252_c2_g2_i1, TRINITY_DN61696_c1_g8_i1, TRINITY_DN40695_c0_g2_i1, TRINITY_DN62211_c2_g1_i1, TRINITY_DN52822_c1_g1_i1, TRINITY_DN62544_c0_g1_i1, TRINITY_DN52378_c0_g1_i1, TRINITY_D…	map00040
Pentose and glucuronate interconversions	96	pectin depolymerase	ec:3.2.1.15	33	TRINITY_DN59730_c3_g2_i1, TRINITY_DN62093_c2_g1_i1, TRINITY_DN60511_c1_g1_i1, TRINITY_DN49061_c0_g1_i1, TRINITY_DN56444_c0_g1_i1, TRINITY_DN50123_c0_g1_i1, TRINITY_DN56976_c3_g1_i1, TRINITY_DN60383_c5_g1_i1, TRINITY_DN56976_c3_g3_i1, TRINITY_DN44135_c1_g1_i1, TRINITY_DN50428_c0_g1_i1, TRINITY_DN56270_c5_g1_i1, TRINITY_DN65099_c3_g1_i1, TRINITY_DN59237_c3_g1_i1, TRINITY_DN59730_c0_g1_i1, TRINITY_D…	map00040
				6039
